# Supplementary material for: Identification of Regional Soil Quality Factors and Indicators: An Alluvial PlainFrom Central Anatolia
Source: Copernicus journal article supplement (doi:10.5194/se-2016-138), 2016-10-26
Supplement: Supplementary file [file se-2016-138-AC1-supplement.pdf]

# 1 Identification of Regional Soil Quality Factors and Indicators: An Alluvial Plain

## 2 From Central Anatolia

3 Cevdet Şeker <sup>a</sup>, Hasan Hüseyin Özyatekin <sup>a,\*</sup>, Hamza Negiş <sup>a</sup>, İlknur Gümüş <sup>a</sup>, Mert Dedeoğlu  
4 <sup>a</sup>, Emel Atmaca <sup>a</sup>, Ümmühan Karaca <sup>a</sup>

5  
6 <sup>a</sup>Selçuk University, Agriculture Faculty, Department of Soil Science and Plant Nutrition, 42079 Konya  
7 TURKEY

8 \*Corresponding Author

### 9 Abstract

10 Sustainable agriculture largely depends on soil quality (SQ). The evaluation of  
11 agricultural soil quality is essential for economic success and environmental stability in  
12 rapidly developing regions. A wide variety of methods are currently used to evaluate soil  
13 quality using vastly different indicators.

14 This study was conducted in one of the most important irrigated agriculture areas of  
15 Konya in central Anatolia, Turkey, to analyze the soil quality indicators of Çumra County in  
16 combination with an indicator selection method, the minimum data set (MDS). A total of 38  
17 soil parameters were used to select the most suitable indicators with the MDS method. We  
18 therefore determined a minimum data set with principle component analysis (PCA) to assess  
19 soil quality in the study area and soil quality was evaluated on the basis of a scoring function.

20 Field capacity (FC33), bulk density (Pb), aggregate stability (AS) and permanent  
21 wilting point (WP) from physical soil properties, and electrical conductivity (EC), Mn, total  
22 nitrogen (TN), available phosphorus (AP), pH and NO<sub>3</sub>-N from chemical soil properties, and  
23 urease enzyme activity (UA), root health value (RHV), organic carbon (OC), respiration (R)  
24 and potentially mineralized nitrogen (PMN) from biological properties were chosen as a MDS  
25 from total data sets to assessment of soil quality by principle component (PCA), correlation  
26 analysis and expert opinion.

27 According the results, chosen properties were found as the most sensitive indicators of  
28 soil quality and they can be used as indicators for evaluating and monitoring soil quality at a  
29 regional scale.

30 Keywords: Soil quality, Çumra plain, indicators, minimum data set,

**Açıklama [hn1]:** The way he wants  
the referee was corrected.

## 31 1. Introduction

32 Soil is an important non-renewable natural resource on which humanity and all flora and  
33 fauna are dependent. The ever increasing growth of the human population has brought about a  
34 global food safety problem, and it has become an urgent necessity to obtain greater efficiency  
35 per unit area. In developing countries, the intense use of land on the grounds of progress  
36 through fast economic development has brought about serious limitations on the sustainable  
37 use of soils and created a major problem in soil quality. Furthermore, the negative effects of  
38 land degradation from various causes on agricultural productivity and the indirect effects on  
39 environmental and food safety and quality of life have also become global problems.  
40 Increasing the amount of agricultural lands may seem to be a solution to fulfill the food  
41 demand. On the other hand, the amount of agricultural land is already at a maximum level in  
42 most countries (Eswaran et al., 2001). Thus, for both the resolution of this problem and the  
43 sustainable use of soils, it is much more important to focus on improving the soil quality  
44 rather than increasing the amount of arable land (Rasheed et al., 1996; Yemefack et al., 2006).

45 Soil quality is defined as the capacity of the soil to sustain biological productivity and  
46 preserve the environmental quality and health of plants and animals within the boundaries of  
47 the ecosystem (Doran and Parkin, 1994). Karlen et al. (1997) defined soil quality as the soil's  
48 ability to support sustainable plant and animal production, improve human and environmental  
49 health, enhance the quality of water and air as the function of the properties of each soil type,  
50 and they regarded it as the manifestation of the natural and dynamic properties of soils.

51 The efficient and sustainable usage of soils, which are among our most important natural  
52 resources, can be achieved by defining their properties through proper methods, determining  
53 the restrictions that affect their productivity and the properties that affect sustainability.  
54 Assessing and monitoring soil quality can provide effective tools for determining the

**Açıklama [hn2]:** The way he wants  
the referee was corrected.

55 properties of degraded soil (Bindraban et al., 2000), revealing sustainable land practices for  
56 land managers (Karlen et al., 2011; McGrath and Zhang, 2003) and defining the elements  
57 needed for plant nutrition (Yu-Dong et al., 2013). Thus, soil quality has received great  
58 attention in the last 15 years. In recent years the number of studies assessing soil quality in  
59 different management and product systems has increased worldwide, and several methods and  
60 scoring models have been developed for the determination of soil quality.

61 In the past, soil quality was accepted as the natural capacity of soil that provides the main  
62 plant nutrients. However, it is currently regarded as an immaterial property of soils due to its  
63 dependency on land usage and soil management practices, ecosystem and environmental  
64 interactions, socio-economic and political priorities and several other external factors (Doran  
65 and Jones, 1996). So, it is not possible to use a single soil property to digitize soil quality. On  
66 the other hand, the combined assessment of several parameters formed by the combination of  
67 certain soil properties provides important indicators for monitoring and assessing soil quality.

68 In general, soil quality parameters are defined as the processes and properties of soil that are  
69 sensitive to the changes in soil functions (Aparicio and Costa, 2007; Doran and Jones, 1996).  
70 It is very important to establish simple, sensitive and practical methods for the assessment of  
71 soil quality and to select indicators accordingly. The quality parameters to be selected must  
72 correlate well with the natural processes in the ecosystem. They must also respond to  
73 significant external change in a measurable way, be related to the measurable soil functions  
74 (natural or human-based), be integrated with the physical, chemical and biological properties  
75 and processes of soil, provide the basic inputs needed for estimating soil properties or  
76 functions that are difficult to measured directly, be relatively practical to use in field  
77 conditions, and they must be components of the current data bases (Aparicio and Costa, 2007;  
78 Chen, 1998; Doran and Parkin, 1994; Doran et al., 1996; Dumanski and Pieri, 2000; Herrick  
79 and Jones, 2002).

80 The following properties are reported to be suitable for use as soil quality factors and  
81 indicators when studies on soil quality are evaluated:

82 Physical properties: texture, bulk density, water retention, aeration, compression, hydraulic  
83 properties, aggregation state, consistence properties, and surface crusting (Arshad and Coen,  
84 1992; Burger and Kelting, 1998; Doran and Parkin, 1994; Kay<sup>1</sup> et al., 1996; Larson and  
85 Pierce, 1991; Powers et al., 1998); Chemical properties: pH, salt content, total organic carbon,  
86 total nitrogen, organic nitrogen, soluble carbon, mineral nitrogen, total phosphorus,  
87 extractable ammonium, nitrate, phosphor, potassium, calcium, magnesium, microelements,  
88 contaminants, cation change capacity (Doran and Parkin, 1994; Harris et al., 1996; Larson and  
89 Pierce, 1994; Reganold and Palmer, 1995); Biological properties: microbial carbon, microbial  
90 nitrogen, soil respiration, biological activity, enzyme activities, root development,  
91 germination and growth (Blair et al., 1995; Dick et al., 1996; Doran and Parkin, 1994; Fauci  
92 and Dick, 1994; Gregorich et al., 1994; Harris et al., 1996; Linden et al., 1994; Rice et al.,  
93 1996; Turco et al., 1992); Genetic properties: soil color, type of structure, the thickness and  
94 depth of the impermeable layer that is genetically formed, the thickness of horizon A and  
95 depth of the clay accumulation horizon (Brejda et al., 2000a; Brejda et al., 2000b; Doran and  
96 Parkin, 1994; Qi et al., 2009).

97 To digitize and reveal out soil quality, it is necessary to determine and score the measurable  
98 soil quality parameters. Selection of the indicators to be used is very important for the  
99 determination of soil quality. Several properties affect the soil quality in varying degrees.  
100 Many of the above-mentioned physical, chemical and biological parameters are reported to be  
101 suitable for use as indicators. On the other hand, the concurrent use of all these properties as  
102 quality indicators is both impractical and contrary to the main principles of quality assessment  
103 parameters. Doran et al. (1996) advised that the number of indicators used to determine soil  
104 quality should be as few as possible. In general, the greater the number of indicators, the more

105 comprehensively the soil quality can be determined. However, when a high correlation exists  
106 among the indicators, significant effects may emerge as a problem. Carrying out too many  
107 soil analyses is also laborious. Therefore, neglecting some indicators should be considered.  
108 On the other hand, if the indicators to be neglected are not well selected, non-realistic losses  
109 in soil quality may emerge. Therefore, these authors recommended several approaches. They  
110 recommended some soil quality indicator sets for the assessment of soil quality based on the  
111 total data set (TDS) (Doran and Parkin, 1994; Karlen et al., 1997; Larson and Pierce, 1994).  
112 On the other hand, some studies proposed that instead of using all the properties, certain  
113 parameters such as the presence or absence of a correlation among the parameters and the  
114 measurement practicality could be considered. The MDS formed by representative indicators  
115 selected by various methods such as multiple-variant regression analysis (Doran and Parkin,  
116 1994; Li and Lindstrom, 2001), principal components analysis, factor analysis (Brejda et al.,  
117 2000b; Shukla et al., 2004) and cluster analysis (Einax and Soldt, 1999) could be used for the  
118 determination of soil quality (Andrews et al., 2002; Govaerts et al., 2006; Rezaei et al., 2006).  
119 Other authors stated that just as in the Delphi data set (DDS) (Zhang et al., 2004), soil quality  
120 could be determined by using the indicators that are selected according to expert views  
121 (Herrick and Jones, 2002).

122 The effective and productive use of soils for many years can be achieved by protecting or  
123 improving soil properties. This can be accomplished through approaches that consider the  
124 physical, chemical and biological properties of soils and solutions based on these factors. In  
125 the Middle Eastern Anatolia region in Turkey, sufficient data are lacking about the general  
126 soil quality and the parameters that could be used to determine the soil quality. The Çumra  
127 Plain is one of the most fluvial plains in Turkey. In this study, we aimed to select the  
128 parameters that could be used to establish regional quality indexes and to determine the  
129 variables that affect soil quality.

## 2. MATERIALS AND METHODS

### 2.1. Site description

The study area (Çumra Plain) is a part of the Great Konya Basin in Konya Province, Turkey, is located in the Central Anatolian Plateau (N 37.3° - 37.8° latitude and E 32.5°- 33.3° longitude). The alluvial plains and fans comprise the sediments of several rivers debouching into the southern part of the basin. The alluvial fans or inland deltas consist of sediments ranging from coarse sand to a heavy clay texture. The climate is semi-arid with mild summers and very cold winters. The Konya meteorological station's long-term records show a mean annual precipitation of 296.8 mm, which mostly falls during winter and spring. The total evaporation is 996.6 mm, the mean annual temperature is 10.8°C, and the mean annual soil temperature at 50 cm is 13.1°C (MGM, 2014). The soil moisture and temperature regimes are xeric and mesic, respectively (Staff, 1999).

Detailed soil investigation reports and maps (1:15,000) were used to determine the research area (De Meester, 1970; Meester, 1971, 1970). Physiographically, the study area was a homogenous alluvial plain. When determining the study area on this detailed soil map that was prepared at series and phase levels, we considered the prevalence of the soil series. Accordingly, the *Alibey series*, which covered the largest area in the region, was selected as the study area. This series consists of deep loamy-textured soils formed on the main alluvial fan of the May River. It covers an area of approximately 4000 ha, which represents 6% of the Çumra Plain where irrigated farming is carried out, and is approximately 1023 m above sea level.

### 2.2 Soil Sampling and Analysis

The map of the series, including the coordinate information, was created to determine the points where soil samples would be taken. Samplings and measurements were carried out on

154 108 parcels of land on which wheat and sugar beet were grown in the years 2013-2014 and  
155 the necessary parameters were defined.

156 Degraded samples were taken from different points in each parcel at depths of 0-20 and 20-40  
157 cm and mixed samples were formed for each depth. Mixed samples taken from the surface to  
158 depths of 0-20 cm depth were divided into three subsamples, each of which weighed 1 kg  
159 (Gugino et al., 2009; Karlen et al., 2003). One of these subsamples was dried in the  
160 laboratory, sieved through a 2 mm sieve and used for chemical and physical analyses. The  
161 second was kept in the cooler in +4 °C for biological analysis. The third subsample was  
162 carried to the laboratory in proper containers to be used for the determination of aggregate  
163 stability. This subsample was not ground or sieved and was air dried.

**Açıklama [hn3]:** The way he wants  
the referee was corrected.

164 To determine the texture of the samples, the Bouyoucos hydrometer (Gee and Bauder, 1986)  
165 was used and the oven-dried weight of the non-degraded soil samples was divided into  
166 sample's density to obtain the bulk density ( $P_b$ ) (Blake and Hartge, 1986). The pycnometer  
167 method (Blake and Hartge, 1986) was used to find the particle density ( $P_k$ ) and bulk density  
168 and particle density were used to find porosity ( $P$ ) (Danielson et al., 1986). To find field  
169 capacity ( $FC$ ), a pressure plate was used to obtain the percentage of humidity remaining in the  
170 soil as weight at pressures of 10 kPa ( $FC_{10}$ ) and 33 kPa ( $FC_{33}$ ) (Klute, 1986). To find the  
171 permanent wilting percentage ( $PWP$ ), a pressure plate was used to obtain the percentage of  
172 humidity left in the soil as weight at 1500 kPa pressure (Klute, 1986), and to obtain the  
173 available water ( $AW$ ), the wilting point was deducted from the field capacities ( $FC_{10}$  and  
174  $FC_{33}$ ). Aggregate stability ( $AS$ ) was determined once the degraded samples taken from the  
175 field at 0-20 cm depth were oven dried at 40 °C (for 5 minutes they were kept under a total  
176 rain of 12.5 mm coming from a simulator with a precipitation intensity of 150 mm hour<sup>-1</sup>)  
177 (Gugino et al., 2009). Penetration resistance was measured using Eijkelkamp's penetrometer,  
178 which is pushed under the soil by hand. Upper-layer penetration resistance ( $PR_{0-20}$ ) was



179 measured by taking the averages of the penetration resistance values at 0-20 cm depth, and  
180 lower-layer penetration resistance ( $PR_{20-40}$ ) was measured by taking the averages of the  
181 penetration resistance values at 20-40 cm depth. pH measurement was made according to the  
182 CSHA manual procedure, so 1:1 soil : water ratio was used. Electrical conductivity (EC) was  
183 measured using an electrical conductivity device in a 1:1 soil and pure water mixture (Kacar,  
184 2009; Gugino et al., 2009). Total nitrogen was measured using a LECO CN-2000 device with  
185 the Dumas dry combustion method (Wright and Bailey, 2001). Ammonium nitrogen ( $NH_4^+ -$   
186  $N$ ) and nitrate nitrogen ( $NO_3^- - N$ ) were measured using the Kjeldahl device through  $H_2SO_4$   
187 titration in the solution obtained as a result of distillation first with MgO and then with  
188 Devardo alloy (Keeney and Nelson, 1982). Available phosphorus (AP) was determined by the  
189 Olsen method (Olsen et al., 1982). The solution was extracted using extractable Ca, Mg, Na  
190 and K, 1 N ammonium acetate solution and available Fe, Cu, Mn and Zn were determined  
191 with atomic absorption spectrophotometry through Diethylenetriaminepentaacetic acid  
192 (DTPA) extraction (Kacar, 2009). Organic matter was determined by using a LECO CN-2000  
193 device with Dumas dry combustion (Wright and Bailey, 2001). Active carbon was displayed  
194 at 550 nm on the spectrophotometer in samples with a shaken solution of 0.02 M potassium  
195 permanganate ( $KMnO_4$ ) (Blair et al., 1995; Gugino et al., 2009). Potential mineralizable  
196 nitrogen (PMN) was measured by  $H_2SO_4$  titration in the distilled solution together with MgO  
197 in a Kjeldahl device in extracts obtained from normal and incubated samples and the  
198 difference was obtained (Gugino et al., 2009). Roots of germinated bean plants were removed  
199 from the soil at the end of the blooming period to determine the root health value (RHV)  
200 (Gugino et al., 2009). The following activities were determined: urease enzyme activity (UA)  
201 (Hoffmann and Teicher, 1961), catalyzing enzyme activity (CA) (Beck, 1971), dehydrogenase  
202 enzyme activity (DA) (Thalmann, 1968), and soil respiration (R) (Isermeyer, 1952).  
203 Moreover, mycorrhizal fungi (MSN) were isolated and counted using 30×–40× enlarged

**Açıklama [hn4]:** The way he wants the referee was corrected.

**Açıklama [hn5]:** The way he wants the referee was corrected.

204 microscopic images of the fungi in samples prepared by washing through 38 µm sieves  
205 (Gerdemann and Nicolson, 1963).

## 206 **2.3 Indicators Selection**

207 Selection of the indicators to be used for the determination of soil quality is very important.  
208 Though it would be proper to assess all soil properties within the framework of soil quality,  
209 this is not practical. This is because several parameters are concerned with the assessment of  
210 soil quality, and assessing each of these would require both time and significant costs. Thus, it  
211 is necessary to select among the indicators to be used. The important thing here is that the  
212 parameters to be used as indicators should reflect the soil primarily in a simple and accurate  
213 way (Andrews et al., 2004). Various methods were used to assess soil quality and other  
214 environmental data, such as multiple-variable regression analysis (Doran and Parkin, 1994; Li  
215 and Lindstrom, 2001), principal components and factor analysis (Brejda et al., 2000b; Shukla  
216 et al., 2004), discriminant analysis (Brejda et al., 2000a) and cluster analysis (Einax and Soldt,  
217 1999).

218 In this study, we used principal components analysis among others to assess and monitor soil  
219 quality. For this purpose, the total data set was divided into three groups first to create the  
220 minimum data set from the total of 38 data sets obtained in the study. Physical properties were  
221 included in the first group, chemical properties in the second and biological properties in the  
222 third group. In the first stage, the Kaiser-Meyer-Olkin (KMO) and Bartlett test was conducted  
223 to verify whether the data included in each group were in conformity with the principal  
224 components analysis (Tatlidil, 2002). All properties had values above 0.5 and passed the  
225 KMO and Bartlett test (Table 1). In the second stage, principal components analysis (PCA)  
226 was conducted for each of four data groups to create the minimum data set and correlation  
227 matrixes of the data sets were established (Minitab, 1995). To determine the parameters that

may take part in the minimum data set, minimum data set recommendations were prepared for each series by considering the component loads determined through PCA, correlation load totals, inter-data correlations and analysis methods.

### **3. RESULTS AND DISCUSSION**

#### **3.1. Indicator Selection and Creating the Minimum Data Set**

The values concerning the physical, chemical and biological properties obtained at the end of the study are given in Table 2. The KMO and Bartlett tests were conducted to check whether the data sets that were created based on these properties were in conformity with the principal components analysis. The KMO and Bartlett test results are given in Table 1. The following percentages were obtained at the end of the KMO test: 63.4% for the physical properties (0.634>0.5), 66.7% for the chemical properties (0.0667>0.50), 62.9% (0.62.9>0.50) for the biological properties. The Bartlett test results were significant for all the data sets (significance level=0.000<0.05). These results showed that the physical, chemical and biological properties were in conformity with the principal components analysis and showed a high correlation among the variables (Karagöz and Kösterelioğlu, 2015). When selecting the number of principal components, it is necessary to make selections such that the minimum number of principal components can explain 2/3 (67%) of the total variance. This percentage can be increased up to 95%. On the other hand, as it is necessary to work with many principal components to increase the percentage after 67%, this ratio is kept limited and the number of principal components which meets 67% level is generally used. In the principal components test, we used the number of principal components (PC) whose was eigenvalue > 1 and which explained 2/3 of the total variance. This is because one of the most commonly accepted rules is to select the number of principal components that meets the number of R matrix or S matrix eigenvalues that are greater than 1 (Tatlidil, 2002). Therefore, the eigenvalues of the matrixes

252 were found, and the same number of principal components was selected as the number of  
253 eigenvalues with values greater than 1. For selecting the principal component properties to be  
254 used to create the minimum data set as quality indicators, we accepted as candidates for the  
255 minimum data set those properties whose principal component value had the highest  
256 percentage in the components cluster for explaining the variance. Properties such as the  
257 principal component loads, correlation load totals, inter-data correlations, and analysis  
258 methods were considered when determining the minimum data sets. When deciding which  
259 ones to choose among the properties that are highly correlated, we considered issues such as  
260 whether the property would be practical and inexpensive and whether a relationship existed  
261 between that property and the other properties.

262 Eigenvalues, variance explanation ratios and total variances of the physical properties of soils  
263 at the end of principal component analysis are given in Figure 1. A correlation matrix of the  
264 physical properties selected through the principal component analysis is given in Table 3.  
265 According to that, the first PC explained 43.7%, the second PC 20.2%, the third PC 8.9% and  
266 the fourth PC 7.90% of the variance. As the four PCs explained 80.8% of the total variance  
267 and had an eigenvalue  $\geq 1.1113$ , these four PCs were selected. The principal components  
268 results of the physical properties are given in Figure 3. The properties that contributed most to  
269 the first principal component were Sand (-0.381), Clay (0.294),  $FC_{10}$  (0.354),  $FC_{33}$  (0.379) and  
270 Silt (0.294); the properties contributing most to the second principal component were Pb (-  
271 0.457) and P (0.457); those contributing most to the third principal component were PWP (-  
272 0.564),  $AWC_{10}$  (0.359) and  $AWC_{33}$  (0.523); and the properties contributing most to the fourth  
273 principal component were  $PR_{0-20}$  (-0.481) and  $PR_{20-40}$  (-0.662). From the order of PCs  
274 achieved by assessing the physical properties of soils, Sand, Clay,  $FC_{10}$ ,  $FC_{33}$ , Silt, Pb, P,  
275  $PWP_{1500}$ ,  $AWC_{10}$ ,  $AWC_{33}$ ,  $PR_{0-20}$  and  $PR_{20-40}$  were qualified for selection as candidates for the  
276 minimum data set. However, as it is necessary to use the fewest data in determining soil

277 quality, we needed to select minimum data sets by considering the component data loads,  
278 correlation load totals, inter-data correlations, analysis methods and applicability.

279 According to these criteria, the correlation load totals of the candidate data in PC1, Sand,  
280 Clay, FC<sub>10</sub>, FC<sub>33</sub> and Silt, were 4.352, 3.153, 3.897, 4.099 and 4.209, respectively. It is not  
281 possible to change the values of Sand and Clay in practice and they have no sensitivity against  
282 the periodic climate and land management changes. Therefore, these two properties were  
283 eliminated from the minimum data set. Among the other three properties, FC<sub>33</sub> was the first  
284 physical soil property selected for inclusion in the minimum data set, as it had the highest  
285 correlation load (4.209), was extensively used and showed correlation with 11 of the physical  
286 properties of soil (Table 6). Furthermore, as the high values of FC<sub>33</sub> would mean a greater  
287 accumulation of water in the soils, it will be a quality indicator, particularly for dry and semi-  
288 dry regions to show that plants are less affected from water stress. This will also be valid for  
289 the other regions considering the cost-effective and sustainable use of water. The candidate  
290 PB and P data for PC2 had inner total correlation loads of **1.994**. Because of a high negative  
291 correlation between these two candidate properties ( $R^2 = -0.994$ ;  $p < 0.01$ , Table 9) and P was  
292 measured from Pb, Pb was selected as the second physical property of soil for inclusion in the  
293 minimum data set. The total inner correlation loads of the candidate properties of PC3, PWP,  
294 AWC<sub>10</sub> and AWC<sub>33</sub>, were 1.200, 1.981 and 1.861, respectively. As PWP had the lowest total  
295 correlation load among these three properties and a high positive correlation existed between  
296 AWC<sub>10</sub> and AWC<sub>33</sub> ( $R^2 = 0.821$ ;  $p < 0.0$ ; Table 9), AWC<sub>10</sub> was included in the minimum data  
297 set for PC3. As the candidate data of PC4, PR<sub>0-20</sub> and PR<sub>20-40</sub> indicated the compression at  
298 different depths in the soil, both parameters were included in the minimum data set.

299 In conclusion, FC<sub>33</sub>, Pb, AWC<sub>10</sub>, PR<sub>0-20</sub> and PR<sub>20-40</sub> among the physical soil quality parameters  
300 were included in the minimum data set, and among these selected properties Pb, AWC<sub>10</sub>, PR<sub>0-  
301 20</sub> and PR<sub>20-40</sub> are present in common soil quality assessment systems, such as the CSHA or

302 SMAF (Gugino et al., 2009; Karlen et al., 1997). These selected physical properties are used  
303 in the CSHA and SMAF and they were also reported by many researchers as the quality  
304 indicators for parameters such as  $FC_{33}$  that are not included in the CSHA (Erkossa et al., 2007;  
305 Moncada et al., 2014; Rashidi et al., 2010; Sánchez-Navarro et al., 2015; Yang et al., 2010).

306 At the end of the principal component analysis, the eigenvalues of the chemical properties of  
307 soils, variance explanation ratios and total ratios are given in Figure 2, and the correlation  
308 matrix of the selected chemical properties is given in Table 4. According to this, the first PC  
309 explained 29%, the second PC 19.4%, the third PC 10.7% and the fourth PC 8.7% of the  
310 variance. As these four PCs explained 67.8% of the total variance and had an eigenvalue  
311  $\geq 1.3042$ , they were selected. The principal components results of the chemical properties are  
312 given in Figure 2. The properties that contributed most to the first principal component were  
313 EC (0.447), Lime (0.335) and Mg (0.375); the properties contributing most to the second  
314 principal component were Ca (-0.484), Na (-0.342), K (-0.431), Cu (-0.359) and Mn (-0.417);  
315 the properties contributing most to the third principal component were TN (-0.475), AP (-  
316 0.401) and Zn (-0.411); and the properties that contributed most to the fourth principal  
317 component were pH (-0.359) and  $NO_3-N$  (0.381).

318 From the order of the PCs obtained from assessing the chemical properties of soils, EC, Lime,  
319 Mg, Ca, Na, K, Cu, Mn, TN, AP, Zn, pH and  $NO_3-N$  qualified as candidates for the minimum  
320 data set. However, as it is necessary to use the fewest data in determining the soil quality,  
321 minimum data sets were selected. The total inner correlation loads of the candidate properties  
322 of PC1, EC, Lime and Mg, were 1.585, 1.839 and 1.962, respectively. Although the total EC  
323 correlation load was lower than the other two properties, as the PC load was higher, the region  
324 was located in a dry to semi-dry climate zone and significant salinization problems existed in  
325 certain areas, it was included in the minimum set together with Lime. However, as Mg was  
326 highly correlated with EC ( $R^2=0.623$ ;  $p<0.01$ ) and Lime<sub>0-20</sub> ( $R^2=0.608$ ;  $p<0.01$ ) (Table 6) and

the Mg scopes of the soils subject to the study were above the sufficiency level in all samples, it was not included in the minimum data set.

The total inner correlation loads of the candidate properties of PC2, Ca, Na, K, Cu and Mn, were 3.019, 2.280, 2.891 and 2.131, respectively. As Ca had the highest total correlation load among these five properties and Mn remained below the level of sufficiency in certain samples ( $<14.0 \text{ mg Mn kg}^{-1}$  (FAO, 1990)), it was included in the minimum data set. However, as the Cu and K contents of the soils were above the level of sufficiency in all samples ( $>0.2 \text{ mg Cu kg}^{-1}$  (Follett, 1969);  $>110 \text{ mg K kg}^{-1}$  (FAO, 1990)) and Na was not a nutrient element, it was not included in the minimum data set. The total inner correlation loads of the candidate properties of PC3, TN, AP and Zn, were 1.244, 1.543 and 1.443, respectively. No significant correlation existed among these three properties, Zn remained below the sufficiency level ( $>0.7 \text{ mg Zn kg}^{-1}$  presence (FAO, 1990)), P was an important macro nutrient element and TN remained below the sufficiency level in most of the soils studied ( $<0.09\% \text{ N}$ ); thus, they were included in the minimum data sets for TN, AP and Zn. The total inner correlation load of the candidate properties of pH and  $\text{NO}_3\text{-N}$  was 1.425. Soil pH directly affects the usefulness of the nutrient elements.  $\text{NO}_3\text{-N}$  was lacking in our soils, and when it is excessive, it might cause environmental health problems, it was therefore included in the minimum data set. Similarly, pH, AP, Mn and Zn in CSHA and SMAF were also accepted as soil quality parameters (Andrews et al., 2004; Gugino et al., 2009). ). In conclusion, EC, Lime, Mg, Ca, Mn, TN, AP, Zn, pH and  $\text{NO}_3\text{-N}$  among the chemical soil quality parameters were selected as the variables that could be included in minimum data set. Most of these selected properties are also used as quality criteria in the CSHA and SMAF. Several other researchers reported that Lime, Ca, TN and  $\text{NO}_3\text{-N}$  that are not used in these assessment systems could be used as quality indicators (Baridón and Casas, 2014; Benintende et al., 2015; Liu et al., 2014; Mojiri et al., 2011; Sánchez-Navarro et al., 2015; Shirani et al., 2015; Viana et al., 2014; Zdruli et al., 2014).

From the principal component analysis, the eigenvalues for the biological properties of soils, variance explanation ratios and total ratios are given in Figure 3 and the correlation matrix for the selected physical properties is given in Table 5. The first PC explained 34%, the second PC 23.2% and the third PC 15.3% of the variance. As the three PCs explained 72.5% of the total variance and had an eigenvalue  $\geq 1.3738$ , these three PCs were selected. The properties that contributed most to the first principal component were the amounts of UA (0.486), DA (-0.412) and MSN (0.461); properties that contributed most to the second principal component were OC (-0.410), AC (0.411) and R (-0.426); properties that contributed most to the third principal component were PMN (0.584), RHV (-0.506) and CA (-0.380), and these became candidates for minimum data set. The total inner correlation loads of the candidate properties of PC1, the levels of UA, DA and MSN, were 2.248, 2.044 and 2.184, respectively. As urease had the highest total correlation load among these properties, UA was included in the minimum data set for PC1. Although dehydrogenase was the second property with the highest correlation total, due to the presence of significant correlations both between DA and UA and between DA and AC and the difficulty of determining the amount of MSN, the latter two properties were not included in the minimum data set. The properties that contributed the most to PC2 were OC, AC and R. The correlation load totals of these were 1.680, 1.043 and 1.671, respectively. Among these properties, R and OC, which had the highest principal component coefficient, were included in the minimum set for PC2. Only PMN, RHV and CA were selected as candidates for the PC3 data set. The correlation load totals of PMN, RHV and CA were 1.269, 1.685 and 1.526, respectively. They were included in the minimum data set, as the highest correlation load total was in the RHV. According to the results obtained, OC and R were accepted as soil quality parameters in the CSHA, and OC and R were accepted as soil quality parameters in the SMAF (Andrews et al., 2004; Gugino et al., 2009; Moebius-Clune et al., 2011). Though urease activity among these selected properties is not



377 listed in the CSHA or SMAF, many other researchers reported that these could be used as  
378 quality indicators (Baridón and Casas, 2014; Benintende et al., 2015; Masto et al., 2007;  
379 Saviozzi et al., 2001).

#### 380 **4. CONCLUSIONS**

381 This paper discusses the parameters that could be used to monitor the soil quality in the  
382 Konya Çumra region, one of the most important agricultural lands in Turkey.

383 The study also revealed the physical, chemical and biological parameters that could be used to  
384 assess the soil quality in the study area and in other areas. The MDS was created for the  
385 selection of indicators using the principal component analysis for this purpose. FC<sub>33</sub>, Pb,  
386 AW<sub>10</sub>, PR<sub>0-20</sub> and PR<sub>20-40</sub>, among the physical properties; EC, Mg, lime, Ca, Mn, TN, AP, Zn,  
387 pH and NO<sub>3</sub>-N among the chemical properties; and UA, OC, R and root health among the  
388 biological properties were selected as indicators that could be used in the assessment of soil  
389 quality. Score functions for the properties that exist in the CSHA and SMAF among these  
390 parameters can be used in scoring. On the other hand, other parameters such as FC<sub>33</sub>, lime, Ca,  
391 TN, NO<sub>3</sub>-N and urease were also found to be suitable for use in assessing soil quality.  
392 Consequently, scoring functions of these properties must be developed. In this study, the  
393 MDS method and principal components analysis were found to be appropriate statistical  
394 methods to select the quality indicators.

#### 395 **5. ACKNOWLEDGEMENTS**

396 This study was taken from a research project supported by TUBITAK (Scientific and  
397 Technological Research Council of Turkey, Project No.: TOVAG 112O314) and Selçuk  
398 University (S.U.) BAP Office (Coordinating Office of Scientific Research Projects, Project  
399 No.: 09201086). The authors would like to thank “the TUBITAK and S.U.-BAP staffs”.

## 400 REFERENCES

- 401 Andrews, S., Karlen, D., and Mitchell, J.: A comparison of soil quality indexing methods for  
402 vegetable production systems in Northern California, *Agriculture, ecosystems &*  
403 *environment*, 90, 25-45, 2002.
- 404 Andrews, S. S., Karlen, D. L., and Cambardella, C. A.: The soil management assessment  
405 framework, *Soil Science Society of America Journal*, 68, 1945-1962, 2004.
- 406 Aparicio, V. and Costa, J. L.: Soil quality indicators under continuous cropping systems in the  
407 Argentinean Pampas, *Soil and Tillage Research*, 96, 155-165, 2007.
- 408 Arshad, M. and Coen, G.: Characterization of soil quality: physical and chemical criteria,  
409 *American Journal of Alternative Agriculture*, 7, 25-31, 1992.
- 410 Baridón, J. E. and Casas, R. R.: Quality indicators in subtropical soils of Formosa, Argentina:  
411 Changes for agriculturization process, *International Soil and Water Conservation*  
412 *Research*, 2, 13-24, 2014.
- 413 Beck, T.: Die messung der katalaseaktivitaet von Böden, *Zeitschrift für Pflanzenernährung*  
414 *und Bodenkunde*, 130, 68-81, 1971.
- 415 Benintende, S., Benintende, M., Sterren, M., Saluzzio, M., and Barbagelata, P.: Biological  
416 variables as soil quality indicators: Effect of sampling time and ability to classify soils  
417 by their suitability, *Ecological Indicators*, 52, 147-152, 2015.
- 418 Bindraban, P., Stoorvogel, J., Jansen, D., Vlaming, J., and Groot, J.: Land quality indicators  
419 for sustainable land management: proposed method for yield gap and soil nutrient  
420 balance, *Agriculture, Ecosystems & Environment*, 81, 103-112, 2000.
- 421 Blair, G. J., Lefroy, R. D., and Lisle, L.: Soil carbon fractions based on their degree of  
422 oxidation, and the development of a carbon management index for agricultural  
423 systems, *Crop and Pasture Science*, 46, 1459-1466, 1995.

424 Blake, G. and Hartge, K.: Particle density, Methods of Soil Analysis: Part 1—Physical and  
425 Mineralogical Methods, 1986. 377-382, 1986.

426 Brejda, J. J., Karlen, D. L., Smith, J. L., and Allan, D. L.: Identification of regional soil  
427 quality factors and indicators II. Northern Mississippi Loess Hills and Palouse Prairie,  
428 Soil Science Society of America Journal, 64, 2125-2135, 2000a.

429 Brejda, J. J., Moorman, T. B., Karlen, D. L., and Dao, T. H.: Identification of regional soil  
430 quality factors and indicators I. Central and Southern High Plains, Soil Science  
431 Society of America Journal, 64, 2115-2124, 2000b.

432 Burger, J. A. and Kelting, D. L.: Soil quality monitoring for assessing sustainable forest  
433 management, The contribution of soil science to the development of and  
434 implementation of criteria and indicators of sustainable forest management, 1998. 17-  
435 52, 1998.

436 Chen, Z.: Selecting the indicators to evaluate the soil quality of Taiwan soils and approaching  
437 the national level of sustainable soil management, 1998, 131-171.

438 Danielson, R., Sutherland, P., and Klute, A.: Porosity, Methods of soil analysis. Part 1.  
439 Physical and mineralogical methods, 1986. 443-461, 1986.

440 De Meester, T.: Soils of the Great Konya Basin, Turkey, Agric. Res. Rep, 740, 290, 1970.

441 Dick, R. P., Breakwell, D. P., Turco, R. F., Doran, J., and Jones, A.: Soil enzyme activities  
442 and biodiversity measurements as integrative microbiological indicators, Methods for  
443 assessing soil quality., 1996. 247-271, 1996.

444 Doran, J. W. and Jones, A. J.: Methods for assessing soil quality, Soil Science Society of  
445 America Inc., 1996.

446 Doran, J. W. and Parkin, T. B.: Defining and assessing soil quality, Defining soil quality for a  
447 sustainable environment, 1994. 1-21, 1994.

448 Doran, J. W., Parkin, T. B., and Jones, A.: Quantitative indicators of soil quality: a minimum  
449 data set, *Methods for assessing soil quality*, 1996. 25-37, 1996.

450 Dumanski, J. and Pieri, C.: Land quality indicators: research plan, *Agriculture, Ecosystems &*  
451 *Environment*, 81, 93-102, 2000.

452 Einax, J. and Soldt, U.: Geostatistical and multivariate statistical methods for the assessment  
453 of polluted soils—merits and limitations, *Chemometrics and Intelligent Laboratory*  
454 *Systems*, 46, 79-91, 1999.

455 Erkossa, T., Itanna, F., and Stahr, K.: Indexing soil quality: a new paradigm in soil science  
456 research, *Soil Research*, 45, 129-137, 2007.

457 Eswaran, H., Lal, R., and Reich, P.: Land degradation: an overview, *Responses to Land*  
458 *degradation*, 2001. 20-35, 2001.

459 FAO: Micronutrient Assessment at The Country Level p 1-208, *An international study* (Ed.,  
460 M. Sillanpa). FAO Soil Bulletin 63. Published by FAO, Rome, Italy., 1990.

461 Fauci, M. F. and Dick, R. P.: Microbial biomass as an indicator of soil quality: Effects of  
462 long-term management and recent soil amendments, *Defining soil quality for a*  
463 *sustainable environment*, 1994. 229-234, 1994.

464 Follett, R. H.: Zn, Fe, Mn, and Cu in Colorado soils, 1969. 1969.

465 Gee, G. and Bauder, J.: Particle-size analysis In: Klute, A.(ed) *Methods of soil analysis*, Part  
466 1. American society of Agronomy, Inc., Ma, 1986. 1986.

467 Gerdemann, J. and Nicolson, T. H.: Spores of mycorrhizal Endogone species extracted from  
468 soil by wet sieving and decanting, *Transactions of the British Mycological society*, 46,  
469 235-244, 1963.

470 Govaerts, B., Sayre, K. D., and Deckers, J.: A minimum data set for soil quality assessment of  
471 wheat and maize cropping in the highlands of Mexico, *Soil and Tillage Research*, 87,  
472 163-174, 2006.

Gregorich, E., Monreal, C., Carter, M., Angers, D., and Ellert, B.: Towards a minimum data set to assess soil organic matter quality in agricultural soils, *Canadian journal of soil science*, 74, 367-385, 1994.

Gugino, B. K., Abawi, G. S., Idowu, O. J., Schindelbeck, R. R., Smith, L. L., Thies, J. E., Wolfe, D. W., and Van Es, H. M.: Cornell soil health assessment training manual, Cornell University College of Agriculture and Life Sciences, 2009.

Harris, R. F., Karlen, D. L., Mulla, D. J., Doran, J., and Jones, A.: A conceptual framework for assessment and management of soil quality and health, *Methods for assessing soil quality*, 1996. 61-82, 1996.

Herrick, J. E. and Jones, T. L.: A dynamic cone penetrometer for measuring soil penetration resistance, *Soil Science Society of America Journal*, 66, 1320-1324, 2002.

Hoffmann, G. and Teicher, K.: Ein kolorimetrisches Verfahren zur Bestimmung der Ureaseaktivität in Böden, *Zeitschrift für Pflanzenernährung, Düngung, Bodenkunde*, 95, 55-63, 1961.

Isermeyer, H.: Eine einfache Methode zur Bestimmung der Bodenatmung und der Karbonate im Boden, *Zeitschrift für Pflanzenernährung, Düngung, Bodenkunde*, 56, 26-38, 1952.

Kacar, B.: Toprak analizleri, Nobel Yayın Dağıtım, 2009.

Karagöz, Y. and Kösterelioğlu, İ.: İletişim becerileri değerlendirme ölçeğinin faktör analizi metodu ile geliştirilmesi, *Dumlupınar Üniversitesi Sosyal Bilimler Dergisi*, 21, 2015.

Karlen, D., Mausbach, M., Doran, J., Cline, R., Harris, R., and Schuman, G.: Soil quality: a concept, definition, and framework for evaluation (a guest editorial), *Soil Science Society of America Journal*, 61, 4-10, 1997.

Karlen, D. L., Birell, S. J., and Hess, J. R.: A five-year assessment of corn stover harvest in central Iowa, USA, *Soil and Tillage Research*, 115, 47-55, 2011.

497 Karlen, D. L., Ditzler, C. A., and Andrews, S. S.: Soil quality: why and how?, *Geoderma*,  
 498 114, 145-156, 2003.

499 Kay<sup>1</sup>, B., Grant, C., and Australia, S.: Structural aspects of soil quality, *Soil Quality is in the*  
 500 *Hands of the Land Manager*, 1996. 37, 1996.

501 Keeney, D. R. and Nelson, D.: Nitrogen—inorganic forms, *Methods of soil analysis. Part 2.*  
 502 *Chemical and microbiological properties*, 1982. 643-698, 1982.

503 Klute, A.: Water retention: laboratory methods, *Methods of Soil Analysis: Part 1—Physical*  
 504 *and Mineralogical Methods*, 1986. 635-662, 1986.

505 Larson, W. and Pierce, F.: *Conservation and enhancement of soil quality*, 1991.

506 Larson, W. E. and Pierce, F. J.: The dynamics of soil quality as a measure of sustainable  
 507 management, *Defining soil quality for a sustainable environment*, 1994. 37-51, 1994.

508 Li, Y. and Lindstrom, M.: Evaluating soil quality—soil redistribution relationship on terraces  
 509 and steep hillslope, *Soil Science Society of America Journal*, 65, 1500-1508, 2001.

510 Linden, D. R., Hendrix, P. F., Coleman, D. C., and van Vliet, P. C.: Faunal indicators of soil  
 511 quality, *Defining soil quality for a sustainable environment*, 1994. 91-106, 1994.

512 Liu, Z., Zhou, W., Shen, J., Li, S., He, P., and Liang, G.: Soil quality assessment of Albic  
 513 soils with different productivities for eastern China, *Soil and Tillage Research*, 140,  
 514 74-81, 2014.

515 Masto, R. E., Chhonkar, P. K., Singh, D., and Patra, A. K.: Soil quality response to long-term  
 516 nutrient and crop management on a semi-arid Inceptisol, *Agriculture, Ecosystems &*  
 517 *Environment*, 118, 130-142, 2007.

518 McGrath, D. and Zhang, C.: Spatial distribution of soil organic carbon concentrations in  
 519 grassland of Ireland, *Applied Geochemistry*, 18, 1629-1639, 2003.

520 Meester, T. d.: *Highly calcareous lacustrine soils in the Great Konya Basin, Turkey*, Pudoc,  
 521 Wageningen, The Netherlands, 1971. 1971.

522 Meester, T. d.: Soils of the Great Konya Basin, Turkiye, Wageningen: Pudoc, Centre for  
523 Agricultural Publishing and Documentation, 1970.

524 MGM: Müdürlüğü, Meteoroloji Genel İklim Verileri. Meteoroloji Genel Müdürlüğü, 2014.

525 Minitab: Minitab reference manual (Release 7.1). In: Minitab Inc., State Coll PA, 16801,  
526 USA, 1995.

527 Moebius-Clune, B., Idowu, O., Schindelbeck, R., Van Es, H., Wolfe, D., Abawi, G., and  
528 Gugino, B.: Developing standard protocols for soil quality monitoring and assessment.  
529 In: Innovations as key to the green revolution in Africa, Springer, 2011.

530 Mojiri, A., Kazemi, Z., and Amirossadat, Z.: Effects of land use changes and hillslope  
531 position on soil quality attributes (A case study: Fereydoonshahr, Iran), African  
532 journal of Agricultural research, 6, 1114-1119, 2011.

533 Moncada, M. P., Gabriels, D., and Cornelis, W. M.: Data-driven analysis of soil quality  
534 indicators using limited data, Geoderma, 235, 271-278, 2014.

535 Olsen, S., Sommers, L., and Page, A.: Methods of soil analysis. Part 2, Agron. Monogr, 9,  
536 403-430, 1982.

537 Powers, R. F., Tiarks, P., and Boyle, J. R.: Assessing soil quality: practicable standards for  
538 sustainable forest productivity in the United States, The contribution of soil science to  
539 the development of and implementation of criteria and indicators of sustainable forest  
540 management, 1998. 53-80, 1998.

541 Qi, Y., Darilek, J. L., Huang, B., Zhao, Y., Sun, W., and Gu, Z.: Evaluating soil quality  
542 indices in an agricultural region of Jiangsu Province, China, Geoderma, 149, 325-334,  
543 2009.

544 Rasheed, S., Li, Z., Xu, D., and Kovacs, A.: Presence of cell-free human immunodeficiency  
545 virus in cervicovaginal secretions is independent of viral load in the blood of human

546 immunodeficiency virus-infected women, American journal of obstetrics and  
547 gynecology, 175, 122-130, 1996.

548 Rashidi, M., Seilsepour, M., Ranjbar, I., Gholami, M., and Abbassi, S.: Evaluation of some  
549 soil quality indicators in the Varamin region, Iran, World Applied Sciences Journal, 9,  
550 101-108, 2010.

551 Reganold, J. P. and Palmer, A. S.: Significance of gravimetric versus volumetric  
552 measurements of soil quality under biodynamic, conventional, and continuous grass  
553 management, Journal of Soil and Water Conservation, 50, 298-305, 1995.

554 Rezaei, S. A., Gilkes, R. J., and Andrews, S. S.: A minimum data set for assessing soil quality  
555 in rangelands, Geoderma, 136, 229-234, 2006.

556 Rice, C. W., Moorman, T. B., and Beare, M.: Role of microbial biomass carbon and nitrogen  
557 in soil quality, Methods for assessing soil quality, 1996. 203-215, 1996.

558 Sánchez-Navarro, A., Gil-Vázquez, J., Delgado-Iniesta, M., Marín-Sanleandro, P., Blanco-  
559 Bernardeau, A., and Ortiz-Silla, R.: Establishing an index and identification of limiting  
560 parameters for characterizing soil quality in Mediterranean ecosystems, Catena, 131,  
561 35-45, 2015.

562 Saviozzi, A., Levi-Minzi, R., Cardelli, R., and Riffaldi, R.: A comparison of soil quality in  
563 adjacent cultivated, forest and native grassland soils, Plant and soil, 233, 251-259,  
564 2001.

565 Shirani, H., Habibi, M., Besalatpour, A., and Esfandiarpour, I.: Determining the features  
566 influencing physical quality of calcareous soils in a semiarid region of Iran using a  
567 hybrid PSO-DT algorithm, Geoderma, 259, 1-11, 2015.

568 Shukla, M., Lal, R., and Ebinger, M.: Soil quality indicators for the north Appalachian  
569 experimental watersheds in Coshocton Ohio, Soil Science, 169, 195-205, 2004.

570 Staff, S. S.: Keys to soil taxonomy, Soil Conservation Service, 1999.



571 Tatlidil, H.: Uygulamali çok degiskenli istatistiksel analiz, Ankara: Cem Web Ofset Ltd. Sti,  
572 2002. 424, 2002.

573 Thalmann, A.: Zur Methodik der bestimmung der dehydrogenaseaktivität im boden mittels  
574 triphenyltetrazoliumchlorid (TTC), Landwirtsch. Forsch, 21, 249-258, 1968.

575 Turco, R., Kennedy, A., and Jawson, M.: Microbial indicators of soil quality, Purdue Univ.,  
576 Lafayette, IN (United States), 1992.

577 Viana, R. M., Ferraz, J. B., Neves, A. F., Vieira, G., and Pereira, B. F.: Soil quality indicators  
578 for different restoration stages on Amazon rainforest, Soil and Tillage Research, 140,  
579 1-7, 2014.

580 Wright, A. F. and Bailey, J. S.: Organic carbon, total carbon, and total nitrogen  
581 determinations in soils of variable calcium carbonate contents using a Leco CN-2000  
582 dry combustion analyzer, Communications in Soil Science and Plant Analysis, 32,  
583 3243-3258, 2001.

584 Yang, J., Kim, S., Ok, Y., Lee, H., Kim, D., and Kim, K.: Determining minimum data set for  
585 soil quality assessment of organic farming system in Korea, 2010, 1-6.

586 Yemefack, M., Jetten, V. G., and Rossiter, D. G.: Developing a minimum data set for  
587 characterizing soil dynamics in shifting cultivation systems, Soil and Tillage Research,  
588 86, 84-98, 2006.

589 Yu-Dong, C., Huo-Yan, W., Jian-Min, Z., Lu, X., Bai-Shu, Z., Yong-Cun, Z., and Xiao-Qin,  
590 C.: Minimum data set for assessing soil quality in farmland of northeast China,  
591 Pedosphere, 23, 564-576, 2013.

592 Zdruli, P., Calabrese, J., Ladisa, G., and Otekhile, A.: Impacts of land cover change on soil  
593 quality of manmade soils cultivated with table grapes in the Apulia Region of south-  
594 eastern Italy, Catena, 121, 13-21, 2014.

595 Zhang, B., Zhang, Y., Chen, D., White, R., and Li, Y.: A quantitative evaluation system of  
596 soil productivity for intensive agriculture in China, *Geoderma*, 123, 319-331, 2004.

597 **Table 1.** Physical, Chemical and Biological Data Sets Belonging to the KMO and Barlett Sphericity Test

598

|                                                  | Physical<br>Properties | Chemical<br>Properties | Biological<br>Properties |
|--------------------------------------------------|------------------------|------------------------|--------------------------|
| Kaiser-Meyer-Olkin Measure of Sampling Adequacy  | 0.634                  | 0.667                  | 0.629                    |
| Bartlett's Test of Sphericity Approx. Chi-Square | 3967.603               | 977.069                | 453.937                  |
| Sphericity                                       | 91                     | 105                    | 36                       |
| Significance level                               | 0.000                  | 0.000                  | 0.000                    |

599

**Table 2.** Physical, Chemical and Biological Properties of Soil at Sampling Sites.

| Parameters            | Variable            |                                         | Mean   | %CV   | Min.   | Max.   |
|-----------------------|---------------------|-----------------------------------------|--------|-------|--------|--------|
| Physical Properties   | Sand                | %                                       | 40.32  | 27.55 | 17.10  | 61.88  |
|                       | Silt                | %                                       | 25.17  | 24.03 | 11.60  | 40.00  |
|                       | Clay                | %                                       | 34.52  | 21.76 | 18.05  | 53.53  |
|                       | Pb                  | g cm <sup>-3</sup>                      | 1.35   | 8.80  | 1.10   | 1.63   |
|                       | Pk                  | g cm <sup>-3</sup>                      | 2.64   | 0.99  | 2.54   | 2.71   |
|                       | P                   | %                                       | 48.85  | 9.22  | 38.38  | 58.00  |
|                       | FC <sub>10</sub>    | g g <sup>-1</sup>                       | 0.32   | 16.55 | 0.22   | 0.46   |
|                       | FC <sub>33</sub>    | g g <sup>-1</sup>                       | 0.24   | 17.17 | 0.17   | 0.38   |
|                       | PWP                 | g g <sup>-1</sup>                       | 0.14   | 21.92 | 0.10   | 0.25   |
|                       | AWC <sub>10</sub>   | g g <sup>-1</sup>                       | 0.18   | 21.61 | 0.09   | 0.29   |
|                       | AWC <sub>33</sub>   | g g <sup>-1</sup>                       | 0.10   | 27.36 | 0.04   | 0.20   |
|                       | AS                  | %                                       | 17.84  | 56.07 | 4.83   | 52.32  |
|                       | PR <sub>0-20</sub>  | PSI                                     | 208.08 | 37.70 | 83.00  | 415    |
|                       | PR <sub>20-40</sub> | PSI                                     | 314.82 | 31.32 | 147.00 | 689    |
| Chemical Properties   | pH                  | -                                       | 8.03   | 1.98  | 7.34   | 8.29   |
|                       | EC                  | μS m <sup>-1</sup>                      | 523.50 | 48.08 | 243.00 | 1748   |
|                       | Lime                | %                                       | 8.97   | 20.33 | 6.47   | 16.48  |
|                       | TN                  | %                                       | 0.08   | 35.65 | 0.03   | 0.16   |
|                       | NH <sub>4</sub> -N  | mg kg <sup>-1</sup>                     | 17.13  | 30.56 | 7.00   | 44.89  |
|                       | NO <sub>3</sub> -N  | mg kg <sup>-1</sup>                     | 25.07  | 83.61 | 3.46   | 129.88 |
|                       | AP                  | mg kg <sup>-1</sup>                     | 12.97  | 50.80 | 3.36   | 37.79  |
|                       | Ca                  | mg kg <sup>-1</sup>                     | 5089   | 28.82 | 2622   | 8160   |
|                       | Mg                  | mg kg <sup>-1</sup>                     | 818.90 | 53.54 | 220    | 1925   |
|                       | Na                  | mg kg <sup>-1</sup>                     | 82.36  | 38.41 | 25.00  | 203    |
|                       | K                   | mg kg <sup>-1</sup>                     | 577.50 | 33.95 | 307    | 1356   |
|                       | Fe                  | mg kg <sup>-1</sup>                     | 7.52   | 33.53 | 3.65   | 14.38  |
|                       | Cu                  | mg kg <sup>-1</sup>                     | 1.29   | 29.61 | 0.45   | 2.06   |
|                       | Mn                  | mg kg <sup>-1</sup>                     | 15.82  | 38.81 | 5.45   | 25.97  |
|                       | Zn                  | mg kg <sup>-1</sup>                     | 1.10   | 43.10 | 0.26   | 3.77   |
| Biological Properties | OC                  | %                                       | 0.71   | 31.90 | 0.29   | 1.43   |
|                       | AC                  | mg kg <sup>-1</sup>                     | 486.70 | 49.25 | 96     | 996    |
|                       | PMN                 | μg g <sup>-1</sup> w <sup>-1</sup>      | 9.59   | 50.37 | 0.51   | 20.26  |
|                       | RHV                 | -                                       | 3.90   | 40.29 | 1.00   | 8.00   |
|                       | R                   | mg 100g <sup>-1</sup> 24h <sup>-1</sup> | 25.56  | 23.42 | 11.37  | 39.27  |
|                       | CA                  | mg 5g <sup>-1</sup>                     | 6.56   | 41.33 | 1.87   | 16.20  |
|                       | UA                  | μg g <sup>-1</sup>                      | 189.20 | 90.49 | 17.80  | 581    |
|                       | DA                  | μg g <sup>-1</sup>                      | 2.29   | 69.26 | 0.12   | 5.87   |
|                       | MSN number          | 10g <sup>-1</sup>                       | 60.90  | 78.16 | 5.83   | 259    |

601 Pb, bulk density; Pk, particle density; P, porosity; FC<sub>10</sub>, field capacity (10 kPa); FC<sub>33</sub>, field capacity (33 kPa);  
602 PWP<sub>10</sub>, permanent wilting percentage; AW<sub>10</sub>, available water (10-1500 kPa); AW<sub>33</sub>, available water (33-1500  
603 kPa); AS, Aggregate stability; PR<sub>0-20</sub>, penetration resistance (0-20 cm); PR<sub>20-40</sub>, penetration resistance (20-40  
604 cm); TN, total nitrogen; NH<sub>4</sub>-N, Ammonium nitrogen; NO<sub>3</sub>-N, nitrate nitrogen; YP; Available phosphorus; OC,  
605 organic carbon; AC, active carbon; PMN, Potential mineralizable nitrogen; RHV, root health value; R,  
606 respiration; UA urease enzyme activity; CA, catalyzing enzyme activity; DA, dehydrogenase enzyme activity,  
607 MSN, mycorrhizal fungi.

**Table 3.** Correlation Matrixes of the Selected Physical Properties in Principal Components Analysis

| PC1 variables       | Sand               | Silt                  | Clay                  | FC <sub>10</sub> | FC <sub>33</sub> |
|---------------------|--------------------|-----------------------|-----------------------|------------------|------------------|
| Sand                | 1                  | -0,770                | -0,858                | -0,843           | -0,881           |
| Silt                | -0,770             | 1                     | 0,334                 | 0,485            | 0,564            |
| Clay                | -0,858             | 0,334                 | 1                     | 0,856            | 0,849            |
| FC <sub>10</sub>    | -0,843             | 0,485                 | 0,856                 | 1                | 0,915            |
| FC <sub>33</sub>    | -0,881             | 0,564                 | 0,849                 | 0,915            | 1                |
| Total               | 4,352              | 3,153                 | 3,897                 | 4,099            | <b>4,209</b>     |
| PC2 variables       | Pb                 | P                     |                       |                  |                  |
| Pb                  | 1                  | -0,994                |                       |                  |                  |
| P                   | -0,994             | 1                     |                       |                  |                  |
| Total               | <b>1,994</b>       | 1,994                 |                       |                  |                  |
| PC3 variables       | PWP                | AW <sub>10-1500</sub> | AW <sub>33-1500</sub> |                  |                  |
| PWP                 | 1                  | 0,160                 | 0,040                 |                  |                  |
| AWC <sub>10</sub>   | 0,160              | 1                     | 0,821                 |                  |                  |
| AWC <sub>33</sub>   | 0,040              | 0,821                 | 1                     |                  |                  |
| Total               | 1,200              | <b>1,981</b>          | 1,861                 |                  |                  |
| PC4 variables       | PR <sub>0-20</sub> | PR <sub>20-40</sub>   |                       |                  |                  |
| PR <sub>0-20</sub>  | 1                  | 0,788                 |                       |                  |                  |
| PR <sub>20-40</sub> | 0,788              | 1                     |                       |                  |                  |
| Total               | <b>1,788</b>       | <b>1,788</b>          |                       |                  |                  |

**Table 4.** Correlation Matrixes of the Selected Chemical Properties in Principal Components Analysis

| PC1 variables      | EC           | Lime               | Mg           |       |              |
|--------------------|--------------|--------------------|--------------|-------|--------------|
| EC                 | 1            | -0,231             | -0,354       |       |              |
| Lime               | -0,231       | 1                  | 0,608        |       |              |
| Mg                 | -0,354       | 0,608              | 1            |       |              |
| Total              | <b>1,585</b> | <b>1,839</b>       | <b>1,962</b> |       |              |
| PC2 variables      | Ca           | Na                 | K            | Cu    | Mn           |
| Ca                 | 1            | 0,308              | 0,539        | 0,756 | 0,416        |
| Na                 | 0,308        | 1                  | 0,415        | 0,243 | 0,314        |
| K                  | 0,539        | 0,415              | 1            | 0,566 | 0,371        |
| Cu                 | 0,756        | 0,243              | 0,566        | 1     | 0,030        |
| Mn                 | 0,416        | 0,314              | 0,371        | 0,030 | 1            |
| Total              | <b>3,019</b> | 2,280              | 2,891        | 2,595 | <b>2,131</b> |
| PC3 variables      | TN           | AP                 | Zn           |       |              |
| TN                 | 1            | 0,172              | 0,072        |       |              |
| AP                 | 0,172        | 1                  | 0,371        |       |              |
| Zn                 | 0,072        | 0,371              | 1            |       |              |
| Total              | <b>1,244</b> | <b>1,543</b>       | <b>1,443</b> |       |              |
| PC4 variables      | pH           | NO <sub>3</sub> -N |              |       |              |
| pH                 | 1            | -0,425             |              |       |              |
| NO <sub>3</sub> -N | -0,425       | 1                  |              |       |              |
| Total              | <b>1,425</b> | <b>1,425</b>       |              |       |              |

**Table 5.** Correlation Matrixes of the Selected Biological Properties in Principal Components Analysis

| PC1 variables | UA           | DA           | MSN          |
|---------------|--------------|--------------|--------------|
| UA            | 1            | -0,554       | 0,694        |
| DA            | -0,554       | 1            | -0,490       |
| MSN           | 0,694        | -0,490       | 1            |
| Total         | <b>2,248</b> | 2,044        | 2,184        |
| PC2 variables | OC           | AC           | R            |
| OC            | 1            | -0,026       | 0,654        |
| AC            | -0,026       | 1            | 0,017        |
| R             | 0,654        | 0,017        | 1            |
| Total         | <b>1,680</b> | <b>1,043</b> | <b>1,671</b> |
| PC3 variables | PMN          | RHV          | CA           |
| PMN           | 1            | -0,214       | -0,055       |
| RHV           | -0,214       | 1            | 0,471        |
| CA            | -0,055       | 0,471        | 1            |
| Total         | 1,269        | <b>1,685</b> | 1,526        |

**Table 6.** Correlation matrix of physical, chemical and biological properties of soils

|                       |                     | Sand                | Silt     | Clay     | Pb       | Pk                 | P                  | FC <sub>10</sub> | FC <sub>33</sub> | PWP      | AWC <sub>10</sub> | AWC <sub>33</sub> | PR <sub>0-20</sub> | PR <sub>20-40</sub> |
|-----------------------|---------------------|---------------------|----------|----------|----------|--------------------|--------------------|------------------|------------------|----------|-------------------|-------------------|--------------------|---------------------|
| Physical Properties   | Silt                | -0,770**            |          |          |          |                    |                    |                  |                  |          |                   |                   |                    |                     |
|                       | Clay                | -0,858**            | 0,334**  |          |          |                    |                    |                  |                  |          |                   |                   |                    |                     |
|                       | Pb                  | 0,375**             | -0,547** | -0,114   |          |                    |                    |                  |                  |          |                   |                   |                    |                     |
|                       | Pk                  | 0,182 <sup>na</sup> | -0,147   | -0,151   | 0,062    |                    |                    |                  |                  |          |                   |                   |                    |                     |
|                       | P                   | -0,353**            | 0,532**  | 0,095    | -0,994** | 0,048              |                    |                  |                  |          |                   |                   |                    |                     |
|                       | FC <sub>10</sub>    | -0,843**            | 0,485**  | 0,856**  | -0,115   | -0,148             | 0,096              |                  |                  |          |                   |                   |                    |                     |
|                       | FC <sub>33</sub>    | -0,881**            | 0,564**  | 0,849**  | -0,295** | -0,146             | 0,277**            | 0,915**          |                  |          |                   |                   |                    |                     |
|                       | PWP                 | -0,689**            | 0,374**  | 0,718**  | -0,285** | -0,132             | 0,268**            | 0,704**          | 0,763**          |          |                   |                   |                    |                     |
|                       | AWC <sub>10</sub>   | -0,602**            | 0,361**  | 0,599**  | 0,073    | -0,102             | -0,087             | 0,808**          | 0,644**          | 0,160    |                   |                   |                    |                     |
|                       | AWC <sub>33</sub>   | -0,574**            | 0,446**  | 0,489**  | -0,132   | -0,071             | 0,123              | 0,612**          | 0,664**          | 0,040    | 0,821**           |                   |                    |                     |
|                       | AS                  | -0,174              | 0,220*   | 0,080    | -0,525** | -0,223*            | 0,499**            | 0,087            | 0,165            | 0,157    | -0,004            | 0,087             |                    |                     |
|                       | PR <sub>0-20</sub>  | 0,334**             | -0,416** | -0,159   | 0,520**  | 0,089              | -0,507**           | -0,185           | -0,334**         | -0,352** | 0,022             | -0,127            | -0,313**           |                     |
|                       | PR <sub>20-40</sub> | 0,328**             | -0,350** | -0,204*  | 0,333**  | 0,116              | -0,316**           | -0,252**         | -0,349**         | -0,296** | -0,114            | -0,219**          | -0,199**           | 0,788**             |
| Chemical Properties   | pH                  |                     | EC       | Lime     | TN       | NH <sub>4</sub> -N | NO <sub>3</sub> -N | AP               | Ca               | Mg       | Na                | K                 | Fe                 | Cu                  |
|                       | EC                  | -0,604**            |          |          |          |                    |                    |                  |                  |          |                   |                   |                    |                     |
|                       | Lime                | -0,231*             | 0,531**  |          |          |                    |                    |                  |                  |          |                   |                   |                    |                     |
|                       | TN                  | 0,020               | -0,161   | -0,226*  |          |                    |                    |                  |                  |          |                   |                   |                    |                     |
|                       | NH <sub>4</sub> -N  | -0,164              | 0,221*   | 0,195*   | -0,036   |                    |                    |                  |                  |          |                   |                   |                    |                     |
|                       | NO <sub>3</sub> -N  | -0,425**            | 0,719**  | 0,371**  | -0,141   | 0,240*             |                    |                  |                  |          |                   |                   |                    |                     |
|                       | AP                  | -0,230*             | 0,522**  | 0,259**  | 0,172    | 0,058              | 0,257**            |                  |                  |          |                   |                   |                    |                     |
|                       | Ca                  | 0,072               | 0,235*   | 0,115    | 0,002    | 0,083              | 0,279**            | -0,120           |                  |          |                   |                   |                    |                     |
|                       | Mg                  | -0,354**            | 0,623**  | 0,608**  | -0,115   | 0,181              | 0,307**            | 0,518**          | -0,208**         |          |                   |                   |                    |                     |
|                       | Na                  | 0,064               | 0,030    | -0,036   | 0,328**  | -0,059             | -0,081             | 0,117            | 0,308**          | -0,042   |                   |                   |                    |                     |
|                       | K                   | 0,077               | 0,229*   | 0,277**  | 0,206*   | 0,054              | 0,111              | 0,209*           | 0,539**          | -0,010   | 0,415**           |                   |                    |                     |
|                       | Fe                  | 0,315**             | -0,353** | -0,350** | 0,168    | 0,118              | -0,091             | -0,066           | 0,258**          | -0,418** | 0,115             | -0,077            |                    |                     |
|                       | Cu                  | -0,233*             | 0,576**  | 0,434**  | -0,051   | 0,228*             | 0,444**            | 0,133            | 0,756**          | 0,306**  | 0,243*            | 0,566**           | -0,041             |                     |
| Biological Properties | Mn                  | 0,207*              | -0,348** | -0,428** | 0,458**  | -0,218*            | -0,164             | -0,273**         | 0,416**          | -0,749** | 0,314**           | 0,371**           | 0,296**            | 0,030               |
|                       | Zn                  | -0,374*             | 0,518**  | 0,004    | 0,072    | -0,110             | 0,345**            | 0,371**          | 0,105            | 0,208*   | 0,061             | 0,134             | -0,176             | 0,264**             |
|                       | OC                  |                     | AC       | PMN      | RHV      | R                  | CA                 | UA               | DA               |          |                   |                   |                    |                     |
|                       | AC                  | -0,026              |          |          |          |                    |                    |                  |                  |          |                   |                   |                    |                     |
|                       | PMN                 | 0,042               | 0,281**  |          |          |                    |                    |                  |                  |          |                   |                   |                    |                     |
|                       | RHV                 | -0,229              | 0,195    | -0,214*  |          |                    |                    |                  |                  |          |                   |                   |                    |                     |
|                       | R                   | 0,654**             | 0,017    | 0,085    | -0,255** |                    |                    |                  |                  |          |                   |                   |                    |                     |
|                       | CA                  | -0,098              | 0,007    | -0,055   | 0,471**  | -0,343**           |                    |                  |                  |          |                   |                   |                    |                     |
| Biological Properties | UA                  | 0,363**             | 0,401**  | -0,020   | 0,166    | 0,526**            | -0,190             |                  |                  |          |                   |                   |                    |                     |
|                       | DA                  | 0,068               | -0,821** | -0,338** | -0,180   | -0,040             | 0,094              | -0,554**         |                  |          |                   |                   |                    |                     |
| Biological Properties | MSN                 | 0,298**             | 0,337**  | 0,118    | 0,025    | 0,482**            | -0,127             | 0,694**          | -0,490**         |          |                   |                   |                    |                     |

\*  $P < 0,05$ .\*\*  $P < 0,01$ .



**Figure 1.** Result of PCA with physical properties of soil

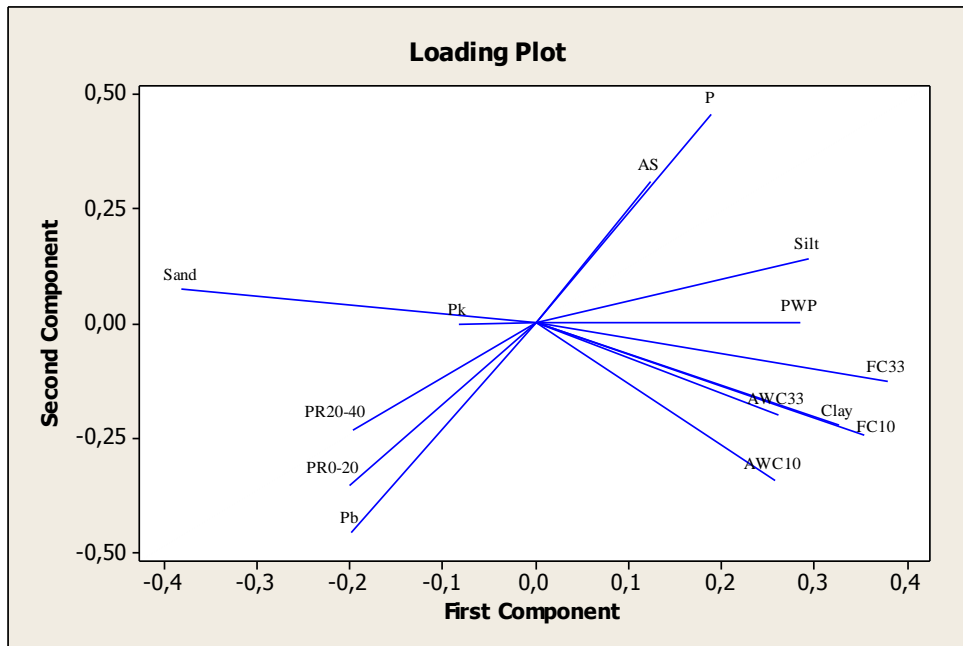

Pb, bulk density; Pk, particle density; P, porosity; FC10, field capacity (10 kPa); FC33, field capacity (33 kPa); PWP10, permanent wilting percentage; AW10, available water (10-1500 kPa); AW33, available water (33-1500 kPa); AS, Aggregate stability; PR0-20, penetration resistance (0-20 cm); PR20-40, penetration resistance (20-40 cm).

**Figure 2.** Result of PCA with chemical properties of soil

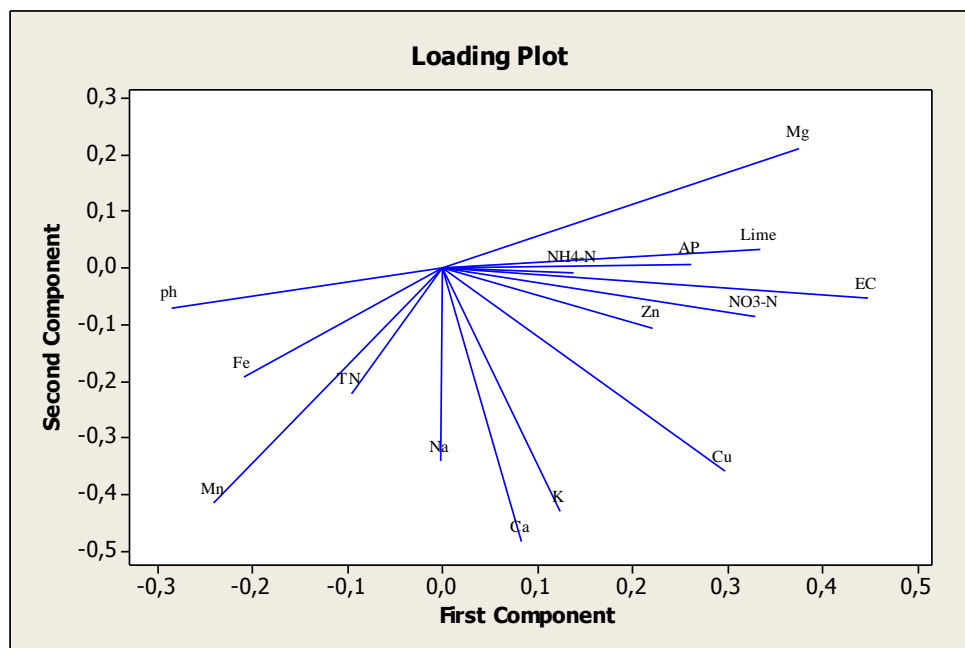

TN, total nitrogen; NH<sub>4</sub>-N, Ammonium nitrogen; NO<sub>3</sub>-N, nitrate nitrogen; AP; Available phosphorus.

**Figure 3.** Result of PCA with biological properties of soil

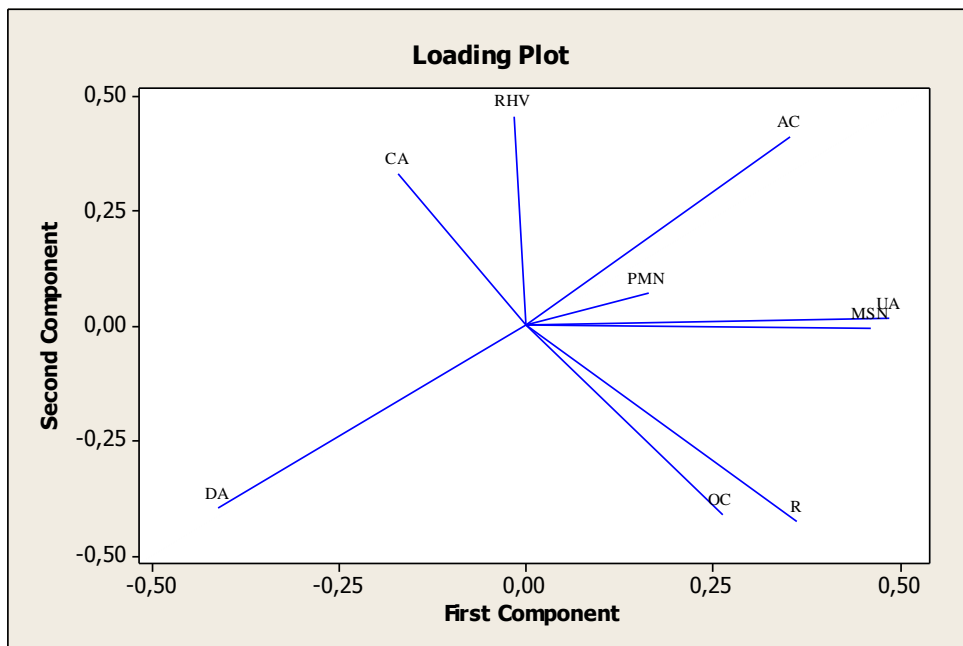

OC, organic carbon; AC, active carbon; PMN, Potential mineralizable nitrogen; RHV, root health value; R, respiration; UA urease enzyme activity; CA, catalyzing enzyme activity; DA, dehydrogenase enzyme activity; MSN, mycorrhizal fungi.
