# Supplementary material for: Identification of Regional Soil Quality Factors and Indicators: An Alluvial PlainFrom Central Anatolia
Source: Copernicus journal article supplement (doi:10.5194/se-2016-138), 2016-10-26
Supplement: Supplementary file [file se-2016-138-AC3-supplement.pdf]

# Identification of Regional Soil Quality Factors and Indicators: An Alluvial Plain

## From Central Anatolia

Cevdet Şeker <sup>a</sup>, Hasan Hüseyin Özyaytekin <sup>a,\*</sup>, Hamza Negiş <sup>a</sup>, İlknur Gümüş <sup>a</sup>, Mert Dedeoğlu <sup>a</sup>, Emel Atmaca <sup>a</sup>, Ümmühan Karaca <sup>a</sup>

<sup>a</sup>Selcuk University, Agriculture Faculty, Department of Soil Science and Plant Nutrition, 42079 Konya  
TURKEY

\*Corresponding Author

### Abstract

**Açıklama [hn1]:** In the abstract, the abbreviations should be eliminated.

Sustainable agriculture largely depends on soil quality. The evaluation of agricultural soil quality is essential for economic success and environmental stability in rapidly developing regions. A wide variety of methods are currently used to evaluate soil quality using vastly different indicators.

This study was conducted in one of the most important irrigated agriculture areas of Konya in central Anatolia, Turkey, to analyze the soil quality indicators of Çumra County in combination with an indicator selection method, the minimum data set. A total of 38 soil parameters were used to select the most suitable indicators with the minimum data set method. We therefore determined a minimum data set with principle component analysis to assess soil quality in the study area and soil quality was evaluated on the basis of a scoring function.

Field capacity, bulk density, aggregate stability and permanent wilting point from physical soil properties, and electrical conductivity, Mn, total nitrogen, available phosphorus, pH and NO<sub>3</sub>-N from chemical soil properties, and urease enzyme activity, root health value, organic carbon, respiration and potentially mineralized nitrogen from biological properties were chosen as a Minimum data set from total data sets to assessment of soil quality by principle component, correlation analysis and expert opinion.

27           According the results, chosen properties were found as the most sensitive indicators of  
28   soil quality and they can be used as indicators for evaluating and monitoring soil quality at a  
29   regional scale.  
30   Keywords: Soil quality, Çumra plain, indicators, minimum data set,

## 31 1. Introduction

32 Soil is an important non-renewable natural resource on which humanity and all flora and  
33 fauna are dependent (Doran and Zeiss, 2000). The ever increasing growth of the human  
34 population has brought about a global food safety problem, and it has become an urgent  
35 necessity to obtain greater efficiency per unit area (Doran, 2002). In developing countries, the  
36 intense use of land on the grounds of progress through fast economic development has  
37 brought about serious limitations on the sustainable use of soils and created a major problem  
38 in soil quality (SQ) (Arshad and Martin, 2002). Furthermore, the negative effects of land  
39 degradation from various causes on agricultural productivity, the indirect effects on  
40 environmental and food safety and quality of life have also become global problems.  
41 Increasing the amount of agricultural lands may seem to be a solution to fulfill the food  
42 demand. On the other hand, the amount of agricultural land is already at a maximum level in  
43 most countries (Eswaran et al., 2001). Thus, for both the resolution of this problem and the  
44 sustainable use of soils, it is much more important to focus on improving the SQ rather than  
45 increasing the amount of arable land (Rasheed et al., 1996; Yemefack et al., 2006).

Açıklama [hn2]: the reference was added

Açıklama [hn3]: the reference was added

Açıklama [hn4]: the reference was added

Açıklama [hn5]: the reference was added

46 SQ is defined as the capacity of the soil to sustain biological productivity and preserve the  
47 environmental quality and health of plants and animals within the boundaries of the  
48 ecosystem (Doran and Parkin, 1994). Karlen et al. (1997) defined SQ as the soil's ability to  
49 support sustainable plant and animal production, improve human and environmental health,  
50 enhance the quality of water and air as the function of the properties of each soil type, and  
51 they regarded it as the manifestation of the natural and dynamic properties of soils.

52 The efficient and sustainable usage of soils, which are among our most important natural  
53 resources, can be achieved by defining their properties through proper methods (Doran,  
54 2002), determining the restrictions that affect their productivity and the properties that affect

55 sustainability (Doran and Zeiss, 2000). Assessing and monitoring SQ can provide effective  
56 tools for determining the properties of degraded soil (Aronson et al., 1993; Bindraban et al.,  
57 2000), revealing sustainable land practices for land managers (Karlen et al., 2011; McGrath  
58 and Zhang, 2003) and defining the elements needed for plant nutrition (Yu-Dong et al., 2013).  
59 Thus, SQ has received great attention in the recent years (Sinha et al., 2014). In recent years  
60 the number of studies assessing SQ in different management and product systems has  
61 increased worldwide, and several methods and scoring models have been developed for the  
62 determination of SQ (Andrews et al., 2004; Brandt and Thornes, 1996; Doran et al., 1997;  
63 Doran and Jones, 1996; Doran et al., 1996; Doran and Zeiss, 2000; Gugino et al., 2009;  
64 Hueso- González et al., 2014; Karlen et al., 1997; Larson and Pierce, 1991; Muñoz-Rojas et  
65 al., 2016).

**Açıklama [hn6]:** the reference was added

**Açıklama [hn7]:** the reference was added

**Açıklama [hn8]:** the reference was added

66 In the past, SQ was accepted as the natural capacity of soil that provides the main plant  
67 nutrients (El-Ramady et al., 2014). However, it is currently regarded as an immaterial  
68 property of soils due to its dependency on land usage and soil management practices,  
69 ecosystem and environmental interactions, socio-economic and political priorities and several  
70 other external factors (Doran and Jones, 1996). So, it is not possible to use a single soil  
71 property to digitize SQ. On the other hand, the combined assessment of several parameters  
72 formed by the combination of certain soil properties provides important indicators for  
73 monitoring and assessing SQ.

**Açıklama [hn9]:** 65-72 lines were revised.

**Açıklama [hn10]:** the reference was added

74 In general, SQ parameters are defined as the processes and properties of soil that are sensitive  
75 to the changes in soil functions (Aparicio and Costa, 2007; Doran and Jones, 1996). It is very  
76 important to establish simple, sensitive and practical methods for the assessment of SQ and to  
77 select indicators accordingly. The quality parameters to be selected must correlate well with  
78 the natural processes in the ecosystem (Özulu et al., 2006). They must also be related to the  
79 measurable soil functions (natural or human-based), be integrated with the physical, chemical

**Açıklama [hn11]:** the reference was added

**Açıklama [hn12]:** 77-81 lines were revised.

80 and biological properties and processes of soil, and they must be components of the current  
81 data bases (Aparicio and Costa, 2007; Chen, 1998; Doran and Parkin, 1994; Doran et al.,  
82 1996; Dumanski and Pieri, 2000; Herrick and Jones, 2002; Muñoz- Rojas et al., 2016).

**Açıklama [hn13]:** the reference was added

83 The following properties are reported to be suitable for use as SQ factors and indicators when  
84 studies on SQ are evaluated: a)Physical properties: texture, bulk density, water retention,  
85 aeration, compression, hydraulic properties, aggregation state, consistence properties, and  
86 surface crusting (Arshad and Coen, 1992; Burger and Kelting, 1998; Doran and Parkin, 1994;  
87 Kay<sup>1</sup> et al., 1996; Larson and Pierce, 1991; Powers et al., 1998); b)Chemical properties: pH,  
88 salt content, total organic carbon, total nitrogen, organic nitrogen, soluble carbon, mineral  
89 nitrogen, total phosphorus, extractable ammonium, nitrate, phosphor, potassium, calcium,  
90 magnesium, microelements, contaminants, cation change capacity (Doran and Parkin, 1994;  
91 Harris et al., 1996; Larson and Pierce, 1994; Reganold and Palmer, 1995); c)Biological  
92 properties: microbial carbon, microbial nitrogen, soil respiration, biological activity, enzyme  
93 activities, root development, germination and growth (Blair et al., 1995; Dick et al., 1996;  
94 Doran and Parkin, 1994; Fauci and Dick, 1994; Gregorich et al., 1994; Harris et al., 1996;  
95 Linden et al., 1994; Rice et al., 1996; Turco et al., 1992); Genetic properties: soil color, type  
96 of structure, the thickness and depth of the impermeable layer that is genetically formed, the  
97 thickness of horizon A and depth of the clay accumulation horizon (Brejda et al., 2000a;  
98 Brejda et al., 2000b; Doran and Parkin, 1994; Qi et al., 2009).

**Açıklama [hn14]:** Physical, chemical, biological and genetic characteristics starting from 82 lines were divided into a, b, c, d.

99 To digitize and reveal out SQ, it is necessary to determine and score the measurable SQ  
100 parameters (Andrews et al., 2002; Andrews et al., 2004; Gugino et al., 2009). Selection of the  
101 indicators to be used is very important for the determination of SQ. Several properties affect  
102 the SQ in varying degrees (Doran and Parkin, 1994; Harris et al., 1996). Many of the above-  
103 mentioned physical, chemical and biological parameters are reported to be suitable for use as  
104 indicators (Arshad and Coen, 1992; Brejda et al., 2000a; Doran and Parkin, 1994; Fernandes

**Açıklama [hn15]:** the reference was added

**Açıklama [hn16]:** the reference was added

**Açıklama [hn17]:** the reference was added

105 et al., 2011; Karlen et al., 1997; Larson and Pierce, 1994; Lima et al., 2013). On the other  
106 hand, the concurrent use of all these properties as quality indicators is both impractical and  
107 contrary to the main principles of quality assessment parameters. Doran et al. (1996) advised  
108 that the number of indicators used to determine SQ should be as few as possible. In general,  
109 the greater the number of indicators, the more comprehensively the SQ can be determined  
110 (Nortcliff, 2002). However, when a high correlation exists among the indicators, significant  
111 effects may emerge as a problem (Doran and Parkin, 1994; Li and Lindstrom, 2001).  
112 Therefore, neglecting some indicators should be considered. On the other hand, if the  
113 indicators to be neglected are not well selected, non-realistic losses in SQ may emerge. Thus,  
114 it is necessary to select among the indicators to be used. Therefore, these authors  
115 recommended several approaches. The important thing here is that the parameters to be used  
116 as indicators should reflect the soil primarily in a simple and accurate way.

**Açıklama [hn18]:** the reference  
was added

**Açıklama [hn19]:** the reference  
was added

117 They recommended some SQ indicator sets for the assessment of SQ based on the total data  
118 set (TDS) (Doran and Parkin, 1994; Karlen et al., 1997; Larson and Pierce, 1994). On the  
119 other hand, some studies proposed that instead of using all the properties, certain parameters  
120 such as the presence or absence of a correlation among the parameters and the measurement  
121 practicality could be considered. The MDS formed by representative indicators selected by  
122 various methods such as multiple-variant regression analysis (Doran and Parkin, 1994; Li and  
123 Lindstrom, 2001), principal components analysis, factor analysis (Brejda et al., 2000b; Shukla  
124 et al., 2004) and cluster analysis (Einax and Soldt, 1999) could be used for the determination  
125 of SQ (Andrews et al., 2002; Govaerts et al., 2006; Rezaei et al., 2006). Other authors stated  
126 that just as in the Delphi data set (DDS) (Zhang et al., 2004), SQ could be determined by  
127 using the indicators that are selected according to expert views (Herrick and Jones, 2002).

128 In the Middle Eastern Anatolia region in Turkey, sufficient data are lacking about the general  
129 SQ and the parameters that could be used to determine the SQ. The Çumra Plain is one of the

130 most fluvial plains in Turkey. In this study, we aimed to select the parameters that could be  
131 used to establish regional quality indexes and to determine the variables that affect SQ.

**Açıklama [hn20]:** Line 127 has been corrected in line with the opinion of the referee.

## 132 2. MATERIALS AND METHODS

### 133 2.1. Site description

134 The study area (Çumra Plain) is a part of the Great Konya Basin in Konya Province, Turkey,  
135 is located in the Central Anatolian Plateau (X: 36 467296-36 473117 m; Y:41 60910-41  
136 52356 m; UTM36N/ED50). The alluvial plains and fans comprise the sediments of several  
137 rivers debouching into the southern part of the basin. The alluvial fans or inland deltas consist  
138 of sediments ranging from coarse sand to a heavy clay texture (sand=17.00-61.00%,  
139 silt=11.00-40.00%, clay=18.00-60.00%). The climate is semi-arid with mild summers and  
140 very cold winters. The Konya meteorological station's long-term records (1971-2014) show a  
141 mean annual precipitation of 296.8 mm, which mostly falls during winter and spring. The  
142 total evaporation is 996.6 mm year<sup>-1</sup>, the mean annual temperature is 10.8°C, and the mean  
143 annual soil temperature at 50 cm depth is 13.1°C (MGM, 2014). The soil moisture and  
144 temperature regimes are xeric and mesic, respectively (Staff, 1999).

**Açıklama [hn21]:** texture percentages were added.

**Açıklama [hn22]:** 1971-2004 years indicated.

**Açıklama [hn23]:** Depth was added.

145 Detailed soil investigation reports and maps (1:15,000) were used to determine the research  
146 area (De Meester, 1970; Meester, 1971, 1970). When determining the study area on this  
147 detailed soil map that was prepared at series and phase levels, we considered the prevalence  
148 of the soil series. For this reason, the *Alibey series*, which covered the largest area in the  
149 region, was selected as the study area. This series consists of deep loamy-textured soils  
150 formed on the main alluvial fan of the May River. It covers an area of approximately 4,000  
151 ha, which represents 6% of the Çumra Plain where irrigated farming (four rotation; corn-  
152 wheat-sugar beet-sun flower) is carried out, and is approximately 1.023 m above sea level.

**Açıklama [hn24]:** 15.000

**Açıklama [hn25]:** "Physiographically, the study area was a homogenous alluvial plain" was removed.

**Açıklama [hn26]:** 4.000

**Açıklama [hn27]:** This information was added.

**Açıklama [hn28]:** 1.023

### 153 2.2 Soil Sampling and Analysis

**Açıklama [hn29]:** Soil Sampling and Analysis has been corrected in line with the opinion of the referee.

154 The map of the series, including the coordinate information, was created to determine the  
155 points where soil samples would be taken. Samplings and measurements were carried in two  
156 sampling period out on 108 parcels of land on which wheat and sugar beet were grown in the  
157 years 2013-2014 and the necessary following parameters were defined for total 108 samples.  
158 Disturbed soil samples were taken from different points in each parcel at depths of 0-20 and  
159 20-40 cm and mixed samples were formed for each depth. Mixed samples taken from the  
160 surface to depths of 0-20 cm depth were divided into three subsamples, each of which  
161 weighed 1 kg (Gugino et al., 2009; Karlen et al., 2003). One of these subsamples was dried  
162 sieved and used for chemical and physical analyses. The second was kept in the cooler in +4  
163 °C for biological analysis. The third subsample be used for the determination of aggregate  
164 stability. The soils textures were determined by Bouyoucos hydrometer methods (Gee and  
165 Bauder, 1986). The bulk density ( $P_b$ ) was measured by core sampling method (Blake and  
166 Hartge, 1986). The pycnometer method (Blake and Hartge, 1986) was used to find the particle  
167 density ( $P_k$ ) and bulk density and particle density were used to find porosity ( $P$ ) (Danielson et  
168 al., 1986). The field capacity ( $FC$ ), was determined at 10 kPa ( $FC_{10}$ ) and 33 kPa ( $FC_{33}$ ) by  
169 pressure plate methods (Klute, 1986). The permanent wilting point ( $PWP$ ), was measured at  
170 1500 kPa pressure (Klute, 1986), and to obtain the available water ( $AW$ ), the wilting point was  
171 deducted from the field capacities ( $FC_{10}$  and  $FC_{33}$ ). Aggregate stability ( $AS$ ) was determined  
172 in a rain simulator (Gugino et al., 2009). Penetration resistance was measured using  
173 Eijkelkamp's penetrometer, which is pushed under the soil by hand. Upper-layer penetration  
174 resistance ( $PR_{0-20}$ ) was measured by taking the averages of the penetration resistance values at  
175 0-20 cm depth, and lower-layer penetration resistance ( $PR_{20-40}$ ) was measured by taking the  
176 averages of the penetration resistance values at 20-40 cm depth. pH measurement was made  
177 according to the CSHA manual procedure, so 1:1 soil:water ratio was used. Electrical  
178 conductivity ( $EC$ ) was measured using an electrical conductivity device in a 1:1 soil and pure

**Açıklama [hn30]:** degraded was removed and disturbed was added.

**Açıklama [hn31]:** "In the laboratory", "through a 2 mm sieve" were removed.

**Açıklama [hn32]:** "was carried to the laboratory in proper containers to" was removed.

**Açıklama [hn33]:** "This subsample was not ground or sieved and was air dried." was removed.



179 water mixture (Kacar, 2009). Total nitrogen was measured using a LECO CN-2000 device  
180 with the Dumas dry combustion method (Wright and Bailey, 2001). Ammonium nitrogen  
181 ( $NH_4^+ - N$ ) and nitrate nitrogen ( $NO_3^- - N$ ) were measured using the Kjeldahl device  
182 (Keeney and Nelson, 1982). Available phosphorus (AP) was determined by the Olsen method  
183 (Olsen et al., 1982). Extractable Ca, Mg, Na and K, were extracted using 1 N ammonium  
184 acetate solution and available Fe, Cu, Mn and Zn were determined with atomic absorption  
185 spectrophotometry through Diethylenetriaminepentaacetic acid (DTPA) extraction (Kacar,  
186 2009). Organic matter was determined by using a LECO CN-2000 device with Dumas dry  
187 combustion (Wright and Bailey, 2001). Active carbon was determined according to (Blair et  
188 al., 1995; Gugino et al., 2009). Potential mineralizable nitrogen (PMN) was measured by  
189 (Gugino et al., 2009). Roots of germinated bean plants were removed from the soil at the end  
190 of the blooming period to determine the root health value (RHV) (Gugino et al., 2009). The  
191 following activities were determined: urease enzyme activity (UA) (Hoffmann and Teicher,  
192 1961), catalyzing enzyme activity (CA) (Beck, 1971), dehydrogenase enzyme activity (DA)  
193 (Thalman, 1968), and soil respiration (R) (Isermeyer, 1952). Moreover, mycorrhizal fungi  
194 (MSN) were isolated and counted using 30×–40× enlarged microscopic images of the fungi in  
195 samples prepared by washing through 38 µm sieves (Gerdeemann and Nicolson, 1963).

## 196 2.3 Indicators Selection

197 Various methods were used to assess SQ and other environmental data, such as multiple-  
198 variable regression analysis (Doran and Parkin, 1994; Li and Lindstrom, 2001), principal  
199 components and factor analysis (Brejda et al., 2000b; Shukla et al., 2004), discriminant  
200 analysis (Brejda et al., 2000a) and cluster analysis (Einax and Soldt, 1999).

201 First The KMO and Bartlett tests were conducted to check whether the data sets that were  
202 created based on these properties were in conformity with the principal components analysis.

**Açıklama [hn34]:** Statistical analysis???

**Açıklama [hn35]:** "Selection of the indicators to be used for the determination of soil quality is very important. Though it would be proper to assess all soil properties within the framework of soil quality, this is not practical. This is because several parameters are concerned with the assessment of soil quality, and assessing each of these would require both time and significant costs. Thus, it is necessary to select among the indicators to be used. The important thing here is that the parameters to be used as indicators should reflect the soil primarily in a simple and accurate way (Andrews *et al.*, 2004)." was removed.

203 In this study, we used principal components analysis among others to assess and monitor SQ.  
204 For this purpose, the total data set was divided into three groups first to create the minimum  
205 data set (MDS) from the total of 38 data sets obtained in the study. Physical properties were  
206 included in the first group, chemical properties in the second and biological properties in the  
207 third group. In the first stage, the Kaiser-Meyer-Olkin (KMO) and Bartlett test was conducted  
208 to verify whether the data included in each group were in conformity with the principal  
209 components analysis (Tatlidil, 2002). All properties had values above  $P>0.5$  and passed the  
210 KMO and Bartlett test (Table 1). In the second stage, principal components analysis (PCA)  
211 was conducted for each of four data groups to create the MDS and correlation matrixes of the  
212 data sets were established (Minitab, 1995). To determine the parameters that may take part in  
213 the MDS, MDS recommendations were prepared for each series by considering the  
214 component loads determined through PCA, correlation load totals, inter-data correlations and  
215 analysis methods.

**Açıklama [hn36]:** P value was added.

### 216 3. RESULTS AND DISCUSSION

#### 217 3.1. Indicator Selection and Creating the Minimum Data Set

218 The values concerning the physical, chemical and biological properties obtained at the end of  
219 the study are given in Table 2. The KMO and Bartlett test results are given in Table 1. The  
220 following percentages were obtained at the end of the KMO test: 63.4% for the physical  
221 properties (P value  $0.634>0.5$ ), 66.7% for the chemical properties (P value  $0.667>0.50$ ),  
222 62.9% (P value  $0.629>0.50$ ) for the biological properties. The Bartlett test results were  
223 significant for all the data sets (P value  $0.000<0.05$ ). These results showed that the physical,  
224 chemical and biological properties were in conformity with the principal components analysis  
225 and showed a high correlation among the variables (Karagöz and Kösterelioğlu, 2015). When  
226 selecting the number of principal components, it is necessary to make selections such that the

**Açıklama [hn37]:** "The KMO and Bartlett tests were conducted to check whether the data sets that were created based on these properties were in conformity with the principal components analysis." was moved the materials and methods section.

227 minimum number of principal components can explain 2/3 (67%) of the total variance. This  
228 percentage can be increased up to 95%. On the other hand, as it is necessary to work with  
229 many principal components to increase the percentage after 67%, this ratio is kept limited and  
230 the number of principal components which meets 67% level is generally used. In the principal  
231 components test, we used the number of PC whose was eigenvalue  $> 1$  and which explained  
232 2/3 of the total variance. This is because one of the most commonly accepted rules is to select  
233 the number of PC that meets the number of R matrix or S matrix eigenvalues that are greater  
234 than 1 (Tatlidil, 2002). Therefore, the eigenvalues of the matrixes were found, and the same  
235 number of PC was selected as the number of eigenvalues with values greater than 1. For  
236 selecting the PC properties to be used to create the MDS as quality indicators, we accepted as  
237 candidates for the MDS those properties whose principal component value had the highest  
238 percentage in the components cluster for explaining the variance. Properties such as the  
239 principal component loads, correlation load totals, inter-data correlations, and analysis  
240 methods were considered when determining the MDS. When deciding which ones to choose  
241 among the properties that are highly correlated, we considered issues such as whether the  
242 property would be practical and inexpensive and whether a relationship existed between that  
243 property and the other properties.

244 The results of PC analysis for the physical properties of soils are given in Figure 1. A  
245 correlation matrix of the physical properties selected through the PC analysis is given in Table  
246 3. According to that, the first PC explained 43.7%, the second PC 20.2%, the third PC 8.9%  
247 and the fourth PC 7.90% of the variance. As the four PCs explained 80.8% of the total  
248 variance and had an eigenvalue  $\geq 1.1113$ , these four PCs were selected. The PC results of the  
249 physical properties are given in Figure 3. The properties that contributed most to the first PC  
250 were Sand (-0.381), Clay (0.294),  $FC_{10}$  (0.354),  $FC_{33}$  (0.379) and Silt (0.294); the properties  
251 contributing most to the second PC were Pb (-0.457) and P (0.457); those contributing most to

the third PC were PWP (-0.564), AWC<sub>10</sub> (0.359) and AWC<sub>33</sub> (0.523); and the properties contributing most to the fourth PC were PR<sub>0-20</sub> (-0.481) and PR<sub>20-40</sub> (-0.662). From the order of PCs achieved by assessing the physical properties of soils, Sand, Clay, FC<sub>10</sub>, FC<sub>33</sub>, Silt, Pb, P, PWP<sub>1500</sub>, AWC<sub>10</sub>, AWC<sub>33</sub>, PR<sub>0-20</sub> and PR<sub>20-40</sub> were qualified for selection as candidates for the MDS. However, as it is necessary to use the fewest data in determining SQ, we needed to select MDS by considering the component data loads, correlation load totals, inter-data correlations, analysis methods and applicability.

According to these criteria, the correlation load totals of the candidate data in PC1, Sand, Clay, FC<sub>10</sub>, FC<sub>33</sub> and Silt, were 4.352, 3.153, 3.897, 4.099 and 4.209, respectively. It is not possible to change the values of Sand and Clay in practice and they have no sensitivity against the periodic climate and land management changes. Therefore, these two properties were eliminated from the MDS. Among the other three properties, FC<sub>33</sub> was the first physical soil property selected for inclusion in the MDS, as it had the highest correlation load (4.209), was extensively used and showed correlation with 11 of the physical properties of soil (Table 6). Furthermore, as the high values of FC<sub>33</sub> would mean a greater accumulation of water in the soils, it will be a quality indicator, particularly for dry and semi-dry regions to show that plants are less affected from water stress. This will also be valid for the other regions considering the cost-effective and sustainable use of water. The candidate PB and P data for PC2 had inner total correlation loads of **1.994**. Because of a high negative correlation between these two candidate properties ( $R^2 = -0.994$ ;  $p < 0.01$ , Table 9) and P was measured from Pb, Pb was selected as the second physical property of soil for inclusion in the MDS. The total inner correlation loads of the candidate properties of PC3, PWP, AWC<sub>10</sub> and AWC<sub>33</sub>, were 1.200, 1.981 and 1.861, respectively. As PWP had the lowest total correlation load among these three properties and a high positive correlation existed between AWC<sub>10</sub> and AWC<sub>33</sub> ( $R^2 = 0.821$ ;  $p < 0.000$ ; Table 9), AWC<sub>10</sub> was included in the MDS for PC3. As the candidate data

277 of PC4, PR<sub>0-20</sub> and PR<sub>20-40</sub> indicated the compression at different depths in the soil, both  
278 parameters were included in the MDS.

279 Summarizing, FC<sub>33</sub>, Pb, AWC<sub>10</sub>, PR<sub>0-20</sub> and PR<sub>20-40</sub> among the physical SQ parameters were  
280 included in the MDS, and among these selected properties Pb, AWC<sub>10</sub>, PR<sub>0-20</sub> and PR<sub>20-40</sub> are  
281 present in common SQ assessment systems, such as the CSHA or SMAF (Gugino et al., 2009;  
282 Karlen et al., 1997). These selected physical properties are used in the CSHA and SMAF and  
283 they were also reported by many researchers as the quality indicators for parameters such as  
284 FC<sub>33</sub> that are not included in the CSHA (Erkossa et al., 2007; Moncada et al., 2014; Rashidi et  
285 al., 2010; Sánchez-Navarro et al., 2015; Yang et al., 2010).

**Açıklama [hn38]:** In conclusion  
deleted.

286 At the end of the PC analysis, of the chemical properties of soils, are given in Figure 2, and  
287 the correlation matrix of the selected chemical properties is given in Table 4. According to  
288 this, the first PC explained 29%, the second PC 19.4%, the third PC 10.7% and the fourth PC  
289 8.7% of the variance. As these four PCs explained 67.8% of the total variance and had an  
290 eigenvalue  $\geq 1.3042$ , they were selected. The PC results of the chemical properties are given in  
291 Figure 2. The properties that contributed most to the first PC were EC (0.447), Lime (0.335)  
292 and Mg (0.375); the properties contributing most to the second PC were Ca (-0.484), Na (-  
293 0.342), K (-0.431), Cu (-0.359) and Mn (-0.417); the properties contributing most to the third  
294 PC were TN (-0.475), AP (-0.401) and Zn (-0.411); and the properties that contributed most to  
295 the fourth PC were pH (-0.359) and NO<sub>3</sub>-N (0.381). From the order of the PCs obtained from  
296 assessing the chemical properties of soils, EC, Lime, Mg, Ca, Na, K, Cu, Mn, TN, AP, Zn, pH  
297 and NO<sub>3</sub>-N qualified as candidates for the MDS. However, as it is necessary to use the fewest  
298 data in determining the SQ, MDS were selected. The total inner correlation loads of the  
299 candidate properties of PC1, EC, Lime and Mg, were 1.585, 1.839 and 1.962, respectively.  
300 Although the total EC correlation load was lower than the other two properties, as the PC load  
301 was higher, the region was located in a dry to semi-dry climate zone and significant

302 salinization problems existed in certain areas, it was included in the minimum set together  
303 with Lime. However, as Mg was highly correlated with EC ( $R^2=0,623$ ;  $p<0,01$ ) and Lime<sub>0-20</sub>  
304 ( $R^2=0,608$ ;  $p<0,01$ ) (Table 6) and the Mg scopes of the soils subject to the study were above  
305 the sufficiency level in all samples, it was not included in the MDS.

306 The total inner correlation loads of the candidate properties of PC2, Ca, Na, K, Cu and Mn,  
307 were 3.019, 2.280, 2.891 and 2.131, respectively. As Ca had the highest total correlation load  
308 among these five properties and Mn remained below the level of sufficiency in certain  
309 samples ( $<14.0$  mg Mn kg<sup>-1</sup> (FAO, 1990)), it was included in the MDS. However, as the Cu  
310 and K contents of the soils were above the level of sufficiency in all samples ( $>0.2$  mg Cu kg<sup>-1</sup>  
311 (Follett, 1969);  $>110$  mg K kg<sup>-1</sup> (FAO, 1990)) and Na was not a nutrient element, it was not  
312 included in the MDS. The total inner correlation loads of the candidate properties of PC3, TN,  
313 AP and Zn, were 1.244, 1.543 and 1.443, respectively. No significant correlation existed  
314 among these three properties, Zn remained below the sufficiency level ( $>0.7$  mg Zn kg<sup>-1</sup>  
315 presence (FAO, 1990)), P was an important macro nutrient element and TN remained below  
316 the sufficiency level in most of the soils studied ( $<0.09\%$  N); thus, they were included in the  
317 MDS for TN, AP and Zn. The total inner correlation load of the candidate properties of pH  
318 and NO<sub>3</sub>-N was 1.425. Soil pH directly affects the usefulness of the nutrient elements. NO<sub>3</sub>-N  
319 was lacking in our soils, and when it is excessive, it might cause environmental health  
320 problems, it was therefore included in the MDS. Similarly, pH, AP, Mn and Zn in CSHA and  
321 SMAF were also accepted as SQ parameters (Andrews et al., 2004; Gugino et al., 2009). ).  
322 Summarizing, EC, Lime, Mg, Ca, Mn, TN, AP, Zn, pH and NO<sub>3</sub>-N among the chemical SQ  
323 parameters were selected as the variables that could be included in MDS. Most of these  
324 selected properties are also used as quality criteria in the CSHA and SMAF. Several other  
325 researchers reported that Lime, Ca, TN and NO<sub>3</sub>-N that are not used in these assessment  
326 systems could be used as quality indicators (Baridón and Casas, 2014; Benintende et al.,

**Açıklama [hn39]:** In conclusion  
deleted.

2015; Liu et al., 2014; Mojiri et al., 2011; Sánchez-Navarro et al., 2015; Shirani et al., 2015; Viana et al., 2014; Zdruli et al., 2014).

From the PC analysis, for the biological properties of soils, are given in Figure 3 and the correlation matrix for the selected biological properties is given in Table 5. The first PC explained 34%, the second PC 23.2% and the third PC 15.3% of the variance. As the three PCs explained 72.5% of the total variance and had an eigenvalue  $\geq 1.3738$ , these three PCs were selected. The properties that contributed most to the first PC were the amounts of UA (0.486), DA (-0.412) and MSN (0.461); properties that contributed most to the second PC were OC (-0.410), AC (0.411) and R (-0.426); properties that contributed most to the third PC were PMN (0.584), RHV (-0.506) and CA (-0.380), and these became candidates for MDS. The total inner correlation loads of the candidate properties of PC1, the levels of UA, DA and MSN, were 2.248, 2.044 and 2.184, respectively. As urease had the highest total correlation load among these properties, UA was included in the MDS for PC1. Although dehydrogenase was the second property with the highest correlation total, due to the presence of significant correlations both between DA and UA and between DA and AC and the difficulty of determining the amount of MSN, the latter two properties were not included in the MDS. The properties that contributed the most to PC2 were OC, AC and R. The correlation load totals of these were 1.680, 1.043 and 1.671, respectively. Among these properties, R and OC, which had the highest PC coefficient, were included in the minimum set for PC2. Only PMN, RHV and CA were selected as candidates for the PC3 data set. The correlation load totals of PMN, RHV and CA were 1.269, 1.685 and 1.526, respectively. They were included in the MDS, as the highest correlation load total was in the RHV. According to the results obtained, OC and R were accepted as SQ parameters in the CSHA, and OC and R were accepted as SQ parameters in the SMAF (Andrews et al., 2004; Gugino et al., 2009; Moebius-Clune et al., 2011). Though urease activity among these selected properties is not listed in the CSHA or

SMAF, many other researchers reported that these could be used as quality indicators (Baridón and Casas, 2014; Benintende et al., 2015; Mastro et al., 2007; Saviozzi et al., 2001).

#### 4. CONCLUSIONS

This paper discusses the parameters that could be used to monitor the SQ in the Konya Çumra region, one of the most important agricultural lands in Turkey.

The study also revealed the physical, chemical and biological parameters that could be used to assess the SQ in the study area and in other areas. The MDS was created for the selection of indicators using the PC analysis for this purpose.  $FC_{33}$ , Pb,  $AW_{10}$ ,  $PR_{0-20}$  and  $PR_{20-40}$ , among the physical properties; EC, Mg, lime, Ca, Mn, TN, AP, Zn, pH and  $NO_3-N$  among the chemical properties; and UA, OC, R and root health among the biological properties were selected as indicators that could be used in the assessment of SQ. Score functions for the properties that exist in the CSHA and SMAF among these parameters can be used in scoring. On the other hand, other parameters such as  $FC_{33}$ , lime, Ca, TN,  $NO_3-N$  and urease were also found to be suitable for use in assessing SQ. Consequently, scoring functions of these properties must be developed. In this study, the MDS method and principal components analysis were found to be appropriate statistical methods to select the quality indicators.

#### 5. ACKNOWLEDGEMENTS

This study was taken from a research project supported by TUBITAK (Scientific and Technological Research Council of Turkey, Project No.: TOVAG 112O314) and Selçuk University (S.U.) BAP Office (Coordinating Office of Scientific Research Projects, Project No.: 09201086). The authors would like to thank “the TUBITAK and S.U.-BAP staffs”.

#### REFERENCES



374 Andrews, S., Karlen, D., and Mitchell, J.: A comparison of soil quality indexing  
 375 methods for vegetable production systems in Northern California, *Agriculture, ecosystems &*  
 376 *environment*, 90, 25-45, 2002.

377 Andrews, S. S., Karlen, D. L., and Cambardella, C. A.: The soil management  
 378 assessment framework, *Soil Science Society of America Journal*, 68, 1945-1962, 2004.

379 Aparicio, V. and Costa, J. L.: Soil quality indicators under continuous cropping  
 380 systems in the Argentinean Pampas, *Soil and Tillage Research*, 96, 155-165, 2007.

381 Aronson, J., Floret, C., Floc'h, E., Ovalle, C., and Pontanier, R.: Restoration and  
 382 Rehabilitation of Degraded Ecosystems in Arid and Semi- Arid Lands. I. A View from the  
 383 South, *Restoration ecology*, 1, 8-17, 1993.

384 Arshad, M. and Coen, G.: Characterization of soil quality: physical and chemical  
 385 criteria, *American Journal of Alternative Agriculture*, 7, 25-31, 1992.

386 Arshad, M. A. and Martin, S.: Identifying critical limits for soil quality indicators in  
 387 agro-ecosystems, *Agriculture, Ecosystems & Environment*, 88, 153-160, 2002.

388 Baridón, J. E. and Casas, R. R.: Quality indicators in subtropical soils of Formosa,  
 389 Argentina: Changes for agriculturization process, *International Soil and Water Conservation*  
 390 *Research*, 2, 13-24, 2014.

391 Beck, T.: Die messung der katalaseaktivitaet von Böden, *Zeitschrift für*  
 392 *Pflanzenernährung und Bodenkunde*, 130, 68-81, 1971.

393 Benintende, S., Benintende, M., Sterren, M., Saluzzio, M., and Barbagelata, P.:  
 394 Biological variables as soil quality indicators: Effect of sampling time and ability to classify  
 395 soils by their suitability, *Ecological Indicators*, 52, 147-152, 2015.

396 Bindraban, P., Stoorvogel, J., Jansen, D., Vlaming, J., and Groot, J.: Land quality  
 397 indicators for sustainable land management: proposed method for yield gap and soil nutrient  
 398 balance, *Agriculture, Ecosystems & Environment*, 81, 103-112, 2000.

399           Blair, G. J., Lefroy, R. D., and Lisle, L.: Soil carbon fractions based on their degree of  
400   oxidation, and the development of a carbon management index for agricultural systems, *Crop*  
401   and *Pasture Science*, 46, 1459-1466, 1995.

402           Blake, G. and Hartge, K.: Particle density, *Methods of Soil Analysis: Part 1—Physical*  
403   and *Mineralogical Methods*, 1986. 377-382, 1986.

404           Brandt, C. J. and Thornes, J. B.: *Mediterranean desertification and land use*, John  
405   Wiley & Sons Ltd, 1996.

406           Brejda, J. J., Karlen, D. L., Smith, J. L., and Allan, D. L.: Identification of regional  
407   soil quality factors and indicators II. Northern Mississippi Loess Hills and Palouse Prairie,  
408   *Soil Science Society of America Journal*, 64, 2125-2135, 2000a.

409           Brejda, J. J., Moorman, T. B., Karlen, D. L., and Dao, T. H.: Identification of regional  
410   soil quality factors and indicators I. Central and Southern High Plains, *Soil Science Society of*  
411   *America Journal*, 64, 2115-2124, 2000b.

412           Burger, J. A. and Kelting, D. L.: Soil quality monitoring for assessing sustainable  
413   forest management, *The contribution of soil science to the development of and*  
414   *implementation of criteria and indicators of sustainable forest management*, 1998. 17-52,  
415   1998.

416           Chen, Z.: Selecting the indicators to evaluate the soil quality of Taiwan soils and  
417   approaching the national level of sustainable soil management, 1998, 131-171.

418           Danielson, R., Sutherland, P., and Klute, A.: Porosity, *Methods of soil analysis. Part 1.*  
419   *Physical and mineralogical methods*, 1986. 443-461, 1986.

420           De Meester, T.: Soils of the Great Konya Basin, Turkey, *Agric. Res. Rep*, 740, 290,  
421   1970.

422           Dick, R. P., Breakwell, D. P., Turco, R. F., Doran, J., and Jones, A.: Soil enzyme  
423   activities and biodiversity measurements as integrative microbiological indicators, *Methods*  
424   for assessing soil quality., 1996. 247-271, 1996.

425           Doran, J., Safley, M., Pankhurst, C., Doube, B., and Gupta, V.: Defining and assessing  
426   soil health and sustainable productivity, *Biological indicators of soil health.*, 1997. 1-28,  
427   1997.

428           Doran, J. W.: Soil health and global sustainability: translating science into practice,  
429   *Agriculture, ecosystems & environment*, 88, 119-127, 2002.

430           Doran, J. W. and Jones, A. J.: *Methods for assessing soil quality*, Soil Science Society  
431   of America Inc., 1996.

432           Doran, J. W. and Parkin, T. B.: Defining and assessing soil quality, *Defining soil*  
433   quality for a sustainable environment, 1994. 1-21, 1994.

434           Doran, J. W., Parkin, T. B., and Jones, A.: Quantitative indicators of soil quality: a  
435   minimum data set, *Methods for assessing soil quality.*, 1996. 25-37, 1996.

436           Doran, J. W. and Zeiss, M. R.: Soil health and sustainability: managing the biotic  
437   component of soil quality, *Applied soil ecology*, 15, 3-11, 2000.

438           Dumanski, J. and Pieri, C.: Land quality indicators: research plan, *Agriculture,*  
439   *Ecosystems & Environment*, 81, 93-102, 2000.

440           Einax, J. and Soldt, U.: Geostatistical and multivariate statistical methods for the  
441   assessment of polluted soils—merits and limitations, *Chemometrics and Intelligent*  
442   *Laboratory Systems*, 46, 79-91, 1999.

443           El-Ramady, H. R., Alshaal, T., Amer, M., Domokos-Szabolcsy, É., Elhawat, N.,  
444   Prokisch, J., and Fári, M.: Soil quality and plant nutrition. In: *Sustainable Agriculture*  
445   Reviews 14, Springer, 2014.

446           Erkossa, T., Itanna, F., and Stahr, K.: Indexing soil quality: a new paradigm in soil  
447 science research, *Soil Research*, 45, 129-137, 2007.

448           Eswaran, H., Lal, R., and Reich, P.: Land degradation: an overview, *Responses to*  
449 *Land degradation*, 2001. 20-35, 2001.

450           FAO: Micronutrient Assessment at The Country Level p 1-208, An international study  
451 (Ed., M. Sillanpa). *FAO Soil Bulletin 63*. Published by FAO, Rome, Italy., 1990.

452           Fauci, M. F. and Dick, R. P.: Microbial biomass as an indicator of soil quality: Effects  
453 of long-term management and recent soil amendments, *Defining soil quality for a sustainable*  
454 *environment*, 1994. 229-234, 1994.

455           Fernandes, J. C., Gamero, C. A., Rodrigues, J. G. L., and Mirás-Avalos, J. M.:  
456 Determination of the quality index of a Paleudult under sunflower culture and different  
457 management systems, *Soil and Tillage Research*, 112, 167-174, 2011.

458           Follett, R. H.: Zn, Fe, Mn, and Cu in Colorado soils, 1969. 1969.

459           Gee, G. and Bauder, J.: Particle-size analysis In: Klute, A.(ed) *Methods of soil*  
460 *analysis*, Part 1. American society of Agronomy, Inc., Ma, 1986. 1986.

461           Gerdemann, J. and Nicolson, T. H.: Spores of mycorrhizal *Endogone* species extracted  
462 from soil by wet sieving and decanting, *Transactions of the British Mycological society*, 46,  
463 235-244, 1963.

464           Govaerts, B., Sayre, K. D., and Deckers, J.: A minimum data set for soil quality  
465 assessment of wheat and maize cropping in the highlands of Mexico, *Soil and Tillage*  
466 *Research*, 87, 163-174, 2006.

467           Gregorich, E., Monreal, C., Carter, M., Angers, D., and Ellert, B.: Towards a  
468 minimum data set to assess soil organic matter quality in agricultural soils, *Canadian journal*  
469 *of soil science*, 74, 367-385, 1994.

470           Gugino, B. K., Abawi, G. S., Idowu, O. J., Schindelbeck, R. R., Smith, L. L., Thies, J.  
471 E., Wolfe, D. W., and Van Es, H. M.: Cornell soil health assessment training manual, Cornell  
472 University College of Agriculture and Life Sciences, 2009.

473           Harris, R. F., Karlen, D. L., Mulla, D. J., Doran, J., and Jones, A.: A conceptual  
474 framework for assessment and management of soil quality and health, *Methods for assessing*  
475 *soil quality.*, 1996. 61-82, 1996.

476           Herrick, J. E. and Jones, T. L.: A dynamic cone penetrometer for measuring soil  
477 penetration resistance, *Soil Science Society of America Journal*, 66, 1320-1324, 2002.

478           Hoffmann, G. and Teicher, K.: Ein kolorimetrisches Verfahren zur Bestimmung der  
479 Ureaseaktivität in Böden, *Zeitschrift für Pflanzenernährung, Düngung, Bodenkunde*, 95, 55-  
480 63, 1961.

481           Hueso- González, P., Martínez- Murillo, J. F., and Ruiz- Sinoga, J. D.: The impact of  
482 organic amendments on forest soil properties under Mediterranean climatic conditions, *Land*  
483 *Degradation & Development*, 25, 604-612, 2014.

484           Isermeyer, H.: Eine einfache Methode zur Bestimmung der Bodenatmung und der  
485 Karbonate im Boden, *Zeitschrift für Pflanzenernährung, Düngung, Bodenkunde*, 56, 26-38,  
486 1952.

487           Kacar, B.: *Toprak analizleri*, Nobel Yayın Dağıtım, 2009.

488           Karagöz, Y. and Kösterelioğlu, İ.: İletişim becerileri değerlendirme ölçeğinin faktör  
489 analizi metodu ile geliştirilmesi, *Dumlupınar Üniversitesi Sosyal Bilimler Dergisi*, 21, 2015.

490           Karlen, D., Mausbach, M., Doran, J., Cline, R., Harris, R., and Schuman, G.: Soil  
491 quality: a concept, definition, and framework for evaluation (a guest editorial), *Soil Science*  
492 *Society of America Journal*, 61, 4-10, 1997.

493           Karlen, D. L., Birell, S. J., and Hess, J. R.: A five-year assessment of corn stover  
494 harvest in central Iowa, USA, *Soil and Tillage Research*, 115, 47-55, 2011.

495 Karlen, D. L., Ditzler, C. A., and Andrews, S. S.: Soil quality: why and how?,  
496 Geoderma, 114, 145-156, 2003.

497 Kay<sup>1</sup>, B., Grant, C., and Australia, S.: Structural aspects of soil quality, Soil Quality is  
498 in the Hands of the Land Manager, 1996. 37, 1996.

499 Keeney, D. R. and Nelson, D.: Nitrogen—inorganic forms, Methods of soil analysis.  
500 Part 2. Chemical and microbiological properties, 1982. 643-698, 1982.

501 Klute, A.: Water retention: laboratory methods, Methods of Soil Analysis: Part 1—  
502 Physical and Mineralogical Methods, 1986. 635-662, 1986.

503 Larson, W. and Pierce, F.: Conservation and enhancement of soil quality, 1991.

504 Larson, W. E. and Pierce, F. J.: The dynamics of soil quality as a measure of  
505 sustainable management, Defining soil quality for a sustainable environment, 1994. 37-51,  
506 1994.

507 Li, Y. and Lindstrom, M.: Evaluating soil quality–soil redistribution relationship on  
508 terraces and steep hillslope, Soil Science Society of America Journal, 65, 1500-1508, 2001.

509 Lima, A., Brussaard, L., Totola, M., Hoogmoed, W., and De Goede, R.: A functional  
510 evaluation of three indicator sets for assessing soil quality, Applied Soil Ecology, 64, 194-  
511 200, 2013.

512 Linden, D. R., Hendrix, P. F., Coleman, D. C., and van Vliet, P. C.: Faunal indicators  
513 of soil quality, Defining soil quality for a sustainable environment, 1994. 91-106, 1994.

514 Liu, Z., Zhou, W., Shen, J., Li, S., He, P., and Liang, G.: Soil quality assessment of  
515 Albic soils with different productivities for eastern China, Soil and Tillage Research, 140, 74-  
516 81, 2014.

517 Masto, R. E., Chhonkar, P. K., Singh, D., and Patra, A. K.: Soil quality response to  
518 long-term nutrient and crop management on a semi-arid Inceptisol, Agriculture, Ecosystems  
519 & Environment, 118, 130-142, 2007.

520 McGrath, D. and Zhang, C.: Spatial distribution of soil organic carbon concentrations  
521 in grassland of Ireland, *Applied Geochemistry*, 18, 1629-1639, 2003.

522 Meester, T. d.: Highly calcareous lacustrine soils in the Great Konya Basin, Turkey,  
523 Pudoc, Wageningen, The Netherlands, 1971. 1971.

524 Meester, T. d.: Soils of the Great Konya Basin, Turkiye, Wageningen: Pudoc, Centre  
525 for Agricultural Publishing and Documentation, 1970.

526 MGM: Müdürlüğü, Meteoroloji Genel İklim Verileri. Meteoroloji Genel Müdürlüğü,  
527 2014.

528 Minitab: Minitab reference manual (Release 7.1). In: Minitab Inc., State Coll PA,  
529 16801, USA, 1995.

530 Moebius-Clune, B., Idowu, O., Schindelbeck, R., Van Es, H., Wolfe, D., Abawi, G.,  
531 and Gugino, B.: Developing standard protocols for soil quality monitoring and assessment. In:  
532 *Innovations as key to the green revolution in Africa*, Springer, 2011.

533 Mojiri, A., Kazemi, Z., and Amirossadat, Z.: Effects of land use changes and hillslope  
534 position on soil quality attributes (A case study: Fereydoonshahr, Iran), *African journal of*  
535 *Agricultural research*, 6, 1114-1119, 2011.

536 Moncada, M. P., Gabriels, D., and Cornelis, W. M.: Data-driven analysis of soil  
537 quality indicators using limited data, *Geoderma*, 235, 271-278, 2014.

538 Muñoz-Rojas, M., Erickson, T. E., Martini, D., Dixon, K. W., and Merritt, D. J.: Soil  
539 physicochemical and microbiological indicators of short, medium and long term post-fire  
540 recovery in semi-arid ecosystems, *Ecological Indicators*, 63, 14-22, 2016.

541 Muñoz- Rojas, M., Erickson, T. E., Dixon, K. W., and Merritt, D. J.: Soil quality  
542 indicators to assess functionality of restored soils in degraded semiarid ecosystems,  
543 *Restoration Ecology*, 2016. 2016.

544 Nortcliff, S.: Standardisation of soil quality attributes, *Agriculture, Ecosystems &*  
545 *Environment*, 88, 161-168, 2002.

546 Olsen, S., Sommers, L., and Page, A.: *Methods of soil analysis. Part 2, Agron.*  
547 *Monogr*, 9, 403-430, 1982.

548 Özulu, M., Özyaytekin, H. H., and Uyanöz, R.: Toprak Kalitesinin  
549 Değerlendirilmesinde Farklı Yaklaşımlar, *Selçuk Tarım Bilimleri Dergisi*, 20, 1-8, 2006.

550 Powers, R. F., Tiarks, P., and Boyle, J. R.: Assessing soil quality: practicable  
551 standards for sustainable forest productivity in the United States, *The contribution of soil*  
552 *science to the development of and implementation of criteria and indicators of sustainable*  
553 *forest management*, 1998. 53-80, 1998.

554 Qi, Y., Darilek, J. L., Huang, B., Zhao, Y., Sun, W., and Gu, Z.: Evaluating soil  
555 quality indices in an agricultural region of Jiangsu Province, China, *Geoderma*, 149, 325-334,  
556 2009.

557 Rasheed, S., Li, Z., Xu, D., and Kovacs, A.: Presence of cell-free human  
558 immunodeficiency virus in cervicovaginal secretions is independent of viral load in the blood  
559 of human immunodeficiency virus-infected women, *American journal of obstetrics and*  
560 *gynecology*, 175, 122-130, 1996.

561 Rashidi, M., Seilsepour, M., Ranjbar, I., Gholami, M., and Abbassi, S.: Evaluation of  
562 some soil quality indicators in the Varamin region, Iran, *World Applied Sciences Journal*, 9,  
563 101-108, 2010.

564 Reganold, J. P. and Palmer, A. S.: Significance of gravimetric versus volumetric  
565 measurements of soil quality under biodynamic, conventional, and continuous grass  
566 management, *Journal of Soil and Water Conservation*, 50, 298-305, 1995.

567 Rezaei, S. A., Gilkes, R. J., and Andrews, S. S.: A minimum data set for assessing soil  
568 quality in rangelands, *Geoderma*, 136, 229-234, 2006.



569           Rice, C. W., Moorman, T. B., and Beare, M.: Role of microbial biomass carbon and  
570   nitrogen in soil quality, *Methods for assessing soil quality*, 1996. 203-215, 1996.

571           Sánchez-Navarro, A., Gil-Vázquez, J., Delgado-Iniesta, M., Marín-Sanleandro, P.,  
572   Blanco-Bernardeau, A., and Ortiz-Silla, R.: Establishing an index and identification of  
573   limiting parameters for characterizing soil quality in Mediterranean ecosystems, *Catena*, 131,  
574   35-45, 2015.

575           Saviozzi, A., Levi-Minzi, R., Cardelli, R., and Riffaldi, R.: A comparison of soil  
576   quality in adjacent cultivated, forest and native grassland soils, *Plant and soil*, 233, 251-259,  
577   2001.

578           Shirani, H., Habibi, M., Besalatpour, A., and Esfandiarpour, I.: Determining the  
579   features influencing physical quality of calcareous soils in a semiarid region of Iran using a  
580   hybrid PSO-DT algorithm, *Geoderma*, 259, 1-11, 2015.

581           Shukla, M., Lal, R., and Ebinger, M.: Soil quality indicators for the north Appalachian  
582   experimental watersheds in Coshocton Ohio, *Soil Science*, 169, 195-205, 2004.

583           Sinha, N. K., Chopra, U. K., Singh, A. K., Mohanty, M., Somasundaram, J., and  
584   Chaudhary, R.: Soil Physical Quality as Affected by Management Practices Under Maize–  
585   Wheat System, *National Academy Science Letters*, 37, 13-18, 2014.

586           Staff, S. S.: *Keys to soil taxonomy*, Soil Conservation Service, 1999.

587           Tatlidil, H.: *Uygulamalı çok degiskenli istatistiksel analiz*, Ankara: Cem Web Ofset  
588   Ltd. Sti, 2002. 424, 2002.

589           Thalmann, A.: Zur Methodik der bestimmung der dehydrogenaseaktivität im boden  
590   mittels triphenyltetrazoliumchlorid (TTC), *Landwirtsch. Forsch*, 21, 249-258, 1968.

591           Turco, R., Kennedy, A., and Jawson, M.: *Microbial indicators of soil quality*, Purdue  
592   Univ., Lafayette, IN (United States), 1992.

593 Viana, R. M., Ferraz, J. B., Neves, A. F., Vieira, G., and Pereira, B. F.: Soil quality  
594 indicators for different restoration stages on Amazon rainforest, *Soil and Tillage Research*,  
595 140, 1-7, 2014.

596 Wright, A. F. and Bailey, J. S.: Organic carbon, total carbon, and total nitrogen  
597 determinations in soils of variable calcium carbonate contents using a Leco CN-2000 dry  
598 combustion analyzer, *Communications in Soil Science and Plant Analysis*, 32, 3243-3258,  
599 2001.

600 Yang, J., Kim, S., Ok, Y., Lee, H., Kim, D., and Kim, K.: Determining minimum data  
601 set for soil quality assessment of organic farming system in Korea, 2010, 1-6.

602 Yemefack, M., Jetten, V. G., and Rossiter, D. G.: Developing a minimum data set for  
603 characterizing soil dynamics in shifting cultivation systems, *Soil and Tillage Research*, 86,  
604 84-98, 2006.

605 Yu-Dong, C., Huo-Yan, W., Jian-Min, Z., Lu, X., Bai-Shu, Z., Yong-Cun, Z., and  
606 Xiao-Qin, C.: Minimum data set for assessing soil quality in farmland of northeast China,  
607 *Pedosphere*, 23, 564-576, 2013.

608 Zdruli, P., Calabrese, J., Ladisa, G., and Otekhile, A.: Impacts of land cover change on  
609 soil quality of manmade soils cultivated with table grapes in the Apulia Region of south-  
610 eastern Italy, *Catena*, 121, 13-21, 2014.

611 Zhang, B., Zhang, Y., Chen, D., White, R., and Li, Y.: A quantitative evaluation  
612 system of soil productivity for intensive agriculture in China, *Geoderma*, 123, 319-331, 2004.

613

614 **Table 1.** Physical, Chemical and Biological Data Sets Belonging to the KMO and Barlett Sphericity Test

615

|                                                  | Physical<br>Properties | Chemical<br>Properties | Biological<br>Properties |
|--------------------------------------------------|------------------------|------------------------|--------------------------|
| Kaiser-Meyer-Olkin Measure of Sampling Adequacy  | 0.634                  | 0.667                  | 0.629                    |
| Bartlett's Test of Sphericity Approx. Chi-Square | 3967                   | 977                    | 453                      |
| Sphericity                                       | 91                     | 105                    | 36                       |
| Significance level                               | 0.000                  | 0.000                  | 0.000                    |

616

**Table 2.** Physical, Chemical and Biological Properties of Soil at Sampling Sites.

| Parameters            | Variable            |                                         | Mean   | %CV   | Min.    | Max.    |
|-----------------------|---------------------|-----------------------------------------|--------|-------|---------|---------|
| Physical Properties   | Sand                | %                                       | 40.32  | 27.55 | 17.10   | 61.88   |
|                       | Silt                | %                                       | 25.17  | 24.03 | 11.60   | 40.00   |
|                       | Clay                | %                                       | 34.52  | 21.76 | 18.05   | 53.53   |
|                       | Pb                  | g cm <sup>-3</sup>                      | 1.35   | 8.80  | 1.10    | 1.63    |
|                       | Pk                  | g cm <sup>-3</sup>                      | 2.64   | 0.99  | 2.54    | 2.71    |
|                       | P                   | %                                       | 48.85  | 9.22  | 38.38   | 58.00   |
|                       | FC <sub>10</sub>    | g g <sup>-1</sup>                       | 0.32   | 16.55 | 0.22    | 0.46    |
|                       | FC <sub>33</sub>    | g g <sup>-1</sup>                       | 0.24   | 17.17 | 0.17    | 0.38    |
|                       | PWP                 | g g <sup>-1</sup>                       | 0.14   | 21.92 | 0.10    | 0.25    |
|                       | AWC <sub>10</sub>   | g g <sup>-1</sup>                       | 0.18   | 21.61 | 0.09    | 0.29    |
|                       | AWC <sub>33</sub>   | g g <sup>-1</sup>                       | 0.10   | 27.36 | 0.04    | 0.20    |
|                       | AS                  | %                                       | 17.84  | 56.07 | 4.83    | 52.32   |
|                       | PR <sub>0-20</sub>  | PSI                                     | 208.08 | 37.70 | 83.00   | 415.00  |
|                       | PR <sub>20-40</sub> | PSI                                     | 314.82 | 31.32 | 147.00  | 689.00  |
| Chemical Properties   | pH                  | -                                       | 8.03   | 1.98  | 7.34    | 8.29    |
|                       | EC                  | μS m <sup>-1</sup>                      | 523.50 | 48.08 | 243.00  | 1748.00 |
|                       | Lime                | %                                       | 8.97   | 20.33 | 6.47    | 16.48   |
|                       | TN                  | %                                       | 0.08   | 35.65 | 0.03    | 0.16    |
|                       | NH <sub>4</sub> -N  | mg kg <sup>-1</sup>                     | 17.13  | 30.56 | 7.00    | 44.89   |
|                       | NO <sub>3</sub> -N  | mg kg <sup>-1</sup>                     | 25.07  | 83.61 | 3.46    | 129.88  |
|                       | AP                  | mg kg <sup>-1</sup>                     | 12.97  | 50.80 | 3.36    | 37.79   |
|                       | Ca                  | mg kg <sup>-1</sup>                     | 5089   | 28.82 | 2622.00 | 8160.00 |
|                       | Mg                  | mg kg <sup>-1</sup>                     | 818.90 | 53.54 | 220.00  | 1925.00 |
|                       | Na                  | mg kg <sup>-1</sup>                     | 82.36  | 38.41 | 25.00   | 203.00  |
|                       | K                   | mg kg <sup>-1</sup>                     | 577.50 | 33.95 | 307.00  | 1356.00 |
|                       | Fe                  | mg kg <sup>-1</sup>                     | 7.52   | 33.53 | 3.65    | 14.38   |
|                       | Cu                  | mg kg <sup>-1</sup>                     | 1.29   | 29.61 | 0.45    | 2.06    |
|                       | Mn                  | mg kg <sup>-1</sup>                     | 15.82  | 38.81 | 5.45    | 25.97   |
|                       | Zn                  | mg kg <sup>-1</sup>                     | 1.10   | 43.10 | 0.26    | 3.77    |
| Biological Properties | OC                  | %                                       | 0.71   | 31.90 | 0.29    | 1.43    |
|                       | AC                  | mg kg <sup>-1</sup>                     | 486.70 | 49.25 | 96.00   | 996.00  |
|                       | PMN                 | μg g <sup>-1</sup> w <sup>-1</sup>      | 9.59   | 50.37 | 0.51    | 20.26   |
|                       | RHV                 | -                                       | 3.90   | 40.29 | 1.00    | 8.00    |
|                       | R                   | mg 100g <sup>-1</sup> 24h <sup>-1</sup> | 25.56  | 23.42 | 11.37   | 39.27   |
|                       | CA                  | mg 5g <sup>-1</sup>                     | 6.56   | 41.33 | 1.87    | 16.20   |
|                       | UA                  | μg g <sup>-1</sup>                      | 189.20 | 90.49 | 17.80   | 581.00  |
|                       | DA                  | μg g <sup>-1</sup>                      | 2.29   | 69.26 | 0.12    | 5.87    |
|                       | MSN number          | 10g <sup>-1</sup>                       | 60.90  | 78.16 | 5.83    | 259.00  |

618 Pb, bulk density; Pk, particle density; P, porosity; FC<sub>10</sub>, field capacity (10 kPa); FC<sub>33</sub>, field capacity (33 kPa);  
 619 PWP<sub>10</sub>, permanent wilting percentage; AW<sub>10</sub>, available water (10-1500 kPa); AW<sub>33</sub>, available water (33-1500  
 620 kPa); AS, Aggregate stability; PR<sub>0-20</sub>, penetration resistance (0-20 cm); PR<sub>20-40</sub>, penetration resistance (20-40  
 621 cm); TN, total nitrogen; NH<sub>4</sub>-N, ammonium nitrogen; NO<sub>3</sub>-N, nitrate nitrogen; AP; available phosphorus; OC,  
 622 organic carbon; AC, active carbon; PMN, potential mineralizable nitrogen; RHV, root health value; R,  
 623 respiration; UA urease enzyme activity; CA, catalyzing enzyme activity; DA, dehydrogenase enzyme activity;  
 624 MSN, mycorrhizal fungi; CV, coefficient of variation; Min, minimum; Max, maximum.

**Table 3.** Correlation Matrixes of the Selected Physical Properties in Principal Components Analysis (\* Selected soil properties as a result of PCA)

| PC1 variables       | Sand               | Silt                  | Clay                  | FC <sub>10</sub> | FC <sub>33</sub> |
|---------------------|--------------------|-----------------------|-----------------------|------------------|------------------|
| Sand                |                    | -0.770                | -0.858                | -0.843           | -0.881           |
| Silt                | -0.770             |                       | 0.334                 | 0.485            | 0.564            |
| Clay                | -0.858             | 0.334                 |                       | 0.856            | 0.849            |
| FC <sub>10</sub>    | -0.843             | 0.485                 | 0.856                 |                  | 0.915            |
| FC <sub>33</sub>    | -0.881             | 0.564                 | 0.849                 | 0.915            |                  |
| Total               | 4.352              | 3.153                 | 3.897                 | 4.099            | 4.209*           |
| PC2 variables       | Pb                 | P                     |                       |                  |                  |
| Pb                  |                    | -0.994                |                       |                  |                  |
| P                   | -0.994             |                       |                       |                  |                  |
| Total               | 1.994*             | 1.994                 |                       |                  |                  |
| PC3 variables       | PWP                | AW <sub>10-1500</sub> | AW <sub>33-1500</sub> |                  |                  |
| PWP                 |                    | 0.160                 | 0.040                 |                  |                  |
| AWC <sub>10</sub>   | 0.160              |                       | 0.821                 |                  |                  |
| AWC <sub>33</sub>   | 0.040              | 0.821                 |                       |                  |                  |
| Total               | 1.200              | 1.981*                | 1.861                 |                  |                  |
| PC4 variables       | PR <sub>0-20</sub> | PR <sub>20-40</sub>   |                       |                  |                  |
| PR <sub>0-20</sub>  |                    | 0.788                 |                       |                  |                  |
| PR <sub>20-40</sub> | 0.788              |                       |                       |                  |                  |
| Total               | 1.788*             | 1.788*                |                       |                  |                  |

628 **Table 4.** Correlation Matrixes of the Selected Chemical Properties in Principal Components Analysis (\* Selected  
629 soil properties as a result of PCA)

| PC1 variables      | EC     | Lime               | Mg     |       |        |
|--------------------|--------|--------------------|--------|-------|--------|
| EC                 |        | -0.231             | -0.354 |       |        |
| Lime               | -0.231 |                    | 0.608  |       |        |
| Mg                 | -0.354 | 0.608              |        |       |        |
| Total              | 1.585* | 1.839*             | 1.962* |       |        |
| PC2 variables      | Ca     | Na                 | K      | Cu    | Mn     |
| Ca                 |        | 0.308              | 0.539  | 0.756 | 0.416  |
| Na                 | 0.308  |                    | 0.415  | 0.243 | 0.314  |
| K                  | 0.539  | 0.415              |        | 0.566 | 0.371  |
| Cu                 | 0.756  | 0.243              | 0.566  |       | 0.030  |
| Mn                 | 0.416  | 0.314              | 0.371  | 0.030 |        |
| Total              | 3.019* | 2.280              | 2.891  | 2.595 | 2.131* |
| PC3 variables      | TN     | AP                 | Zn     |       |        |
| TN                 |        | 0.172              | 0.072  |       |        |
| AP                 | 0.172  |                    | 0.371  |       |        |
| Zn                 | 0.072  | 0.371              |        |       |        |
| Total              | 1.244* | 1.543*             | 1.443* |       |        |
| PC4 variables      | pH     | NO <sub>3</sub> -N |        |       |        |
| pH                 |        | -0.425             |        |       |        |
| NO <sub>3</sub> -N | -0.425 |                    |        |       |        |
| Total              | 1.425* | 1.425*             |        |       |        |

631 **Table 5.** Correlation Matrixes of the Selected Biological Properties in Principal Components Analysis (\*  
632 Selected soil properties as a result of PCA)

| PC1 variables | UA     | DA     | MSN    |
|---------------|--------|--------|--------|
| UA            |        | -0.554 | 0.694  |
| DA            | -0.554 |        | -0.490 |
| MSN           | 0.694  | -0.490 |        |
| Total         | 2.248* | 2.044  | 2.184  |
| PC2 variables | OC     | AC     | R      |
| OC            |        | -0.026 | 0.654  |
| AC            | -0.026 |        | 0.017  |
| R             | 0.654  | 0.017  |        |
| Total         | 1.680* | 1.043* | 1.671* |
| PC3 variables | PMN    | RHV    | CA     |
| PMN           |        | -0.214 | -0.055 |
| RHV           | -0.214 |        | 0.471  |
| CA            | -0.055 | 0.471  |        |
| Total         | 1.269  | 1.685* | 1.526  |

**Table 6.** Correlation matrix of physical, chemical and biological properties of soils (\*  $P < 0.05$ ; \*\*  $P < 0.01$ )

|                       |                     | Sand     | Silt     | Clay     | Pb       | Pk                 | P                  | FC <sub>10</sub> | FC <sub>33</sub> | PWP      | AWC <sub>10</sub> | AWC <sub>33</sub> | PR <sub>0-20</sub> | PR <sub>20-40</sub> |
|-----------------------|---------------------|----------|----------|----------|----------|--------------------|--------------------|------------------|------------------|----------|-------------------|-------------------|--------------------|---------------------|
| Physical Properties   | Silt                | -0.770** |          |          |          |                    |                    |                  |                  |          |                   |                   |                    |                     |
|                       | Clay                | -0.858** | 0.334**  |          |          |                    |                    |                  |                  |          |                   |                   |                    |                     |
|                       | Pb                  | 0.375**  | -0.547** |          |          |                    |                    |                  |                  |          |                   |                   |                    |                     |
|                       | Pk                  |          |          |          |          |                    |                    |                  |                  |          |                   |                   |                    |                     |
|                       | P                   | -0.353** | 0.532**  |          | -0.994** |                    |                    |                  |                  |          |                   |                   |                    |                     |
|                       | FC <sub>10</sub>    | -0.843** | 0.485**  | 0.856**  |          |                    |                    |                  |                  |          |                   |                   |                    |                     |
|                       | FC <sub>33</sub>    | -0.881** | 0.564**  | 0.849**  | -0.295** |                    | 0.277**            | 0.915**          |                  |          |                   |                   |                    |                     |
|                       | PWP                 | -0.689** | 0.374**  | 0.718**  | -0.285** |                    | 0.268**            | 0.704**          | 0.763**          |          |                   |                   |                    |                     |
|                       | AWC <sub>10</sub>   | -0.602** | 0.361**  | 0.599**  |          |                    |                    | 0.808**          | 0.644**          |          |                   |                   |                    |                     |
|                       | AWC <sub>33</sub>   | -0.574** | 0.446**  | 0.489**  |          |                    |                    | 0.612**          | 0.664**          |          | 0.821**           |                   |                    |                     |
|                       | AS                  |          | 0.220*   |          | -0.525** | -0.223*            | 0.499**            |                  |                  |          |                   |                   |                    |                     |
| Chemical Properties   | PR <sub>0-20</sub>  | 0.334**  | -0.416** |          | 0.520**  |                    | -0.507**           |                  | -0.334**         | -0.352** |                   |                   | -0.313**           |                     |
|                       | PR <sub>20-40</sub> | 0.328**  | -0.350** | -0.204*  | 0.333**  |                    | -0.316**           | -0.252**         | -0.349**         | -0.296** |                   | -0.219**          | -0.199**           | 0.788**             |
|                       | pH                  |          | EC       | Lime     | TN       | NH <sub>4</sub> -N | NO <sub>3</sub> -N | AP               | Ca               | Mg       | Na                | K                 | Fe                 | Cu                  |
|                       | EC                  | -0.604** |          |          |          |                    |                    |                  |                  |          |                   |                   |                    |                     |
|                       | Lime                | -0.231*  | 0.531**  |          |          |                    |                    |                  |                  |          |                   |                   |                    |                     |
|                       | TN                  |          |          | -0.226*  |          |                    |                    |                  |                  |          |                   |                   |                    |                     |
|                       | NH <sub>4</sub> -N  |          | 0.221*   | 0.195*   |          |                    |                    |                  |                  |          |                   |                   |                    |                     |
|                       | NO <sub>3</sub> -N  | -0.425** | 0.719**  | 0.371**  |          | 0.240*             |                    |                  |                  |          |                   |                   |                    |                     |
|                       | AP                  | -0.230*  | 0.522**  | 0.259**  |          |                    | 0.257**            |                  |                  |          |                   |                   |                    |                     |
|                       | Ca                  |          | 0.235*   |          |          |                    | 0.279**            |                  |                  |          |                   |                   |                    |                     |
|                       | Mg                  | -0.354** | 0.623**  | 0.608**  |          |                    | 0.307**            | 0.518**          | -0.208**         |          |                   |                   |                    |                     |
|                       | Na                  |          |          |          | 0.328**  |                    |                    |                  | 0.308**          |          |                   |                   |                    |                     |
| Biological Properties | K                   |          | 0.229*   | 0.277**  | 0.206*   |                    |                    | 0.209*           | 0.539**          |          | 0.415**           |                   |                    |                     |
|                       | Fe                  | 0.315**  | -0.353** | -0.350** |          |                    |                    |                  | 0.258**          | -0.418** |                   |                   |                    |                     |
|                       | Cu                  | -0.233*  | 0.576**  | 0.434**  |          | 0.228*             | 0.444**            |                  | 0.756**          | 0.306**  | 0.243*            | 0.566**           |                    |                     |
|                       | Mn                  | 0.207*   | -0.348** | -0.428** | 0.458**  | -0.218*            | -0.164             | -0.273**         | 0.416**          | -0.749** | 0.314**           | 0.371**           | 0.296**            |                     |
|                       | Zn                  | -0.374*  | 0.518**  |          |          |                    | 0.345**            | 0.371**          |                  | 0.208*   |                   |                   |                    |                     |
|                       | OC                  |          | AC       | PMN      | RHV      | R                  | CA                 | UA               | DA               |          |                   |                   |                    |                     |
|                       | AC                  |          |          |          |          |                    |                    |                  |                  |          |                   |                   |                    |                     |
|                       | PMN                 |          | 0.281**  |          |          |                    |                    |                  |                  |          |                   |                   |                    |                     |
|                       | RHV                 |          |          | -0.214*  |          |                    |                    |                  |                  |          |                   |                   |                    |                     |
|                       | R                   | 0.654**  |          |          | -0.255** |                    |                    |                  |                  |          |                   |                   |                    |                     |
|                       | CA                  |          |          |          | 0.471**  | -0.343**           |                    |                  |                  |          |                   |                   |                    |                     |
|                       | UA                  | 0.363**  | 0.401**  |          |          | 0.526**            |                    |                  |                  |          |                   |                   |                    |                     |
|                       | DA                  |          | -0.821** | -0.338** |          |                    |                    | -0.554**         |                  |          |                   |                   |                    |                     |
|                       | MSN                 | 0.298**  | 0.337**  |          |          | 0.482**            |                    | 0.694**          | -0.490**         |          |                   |                   |                    |                     |



**Figure 1.** Result of PCA with physical properties of soil

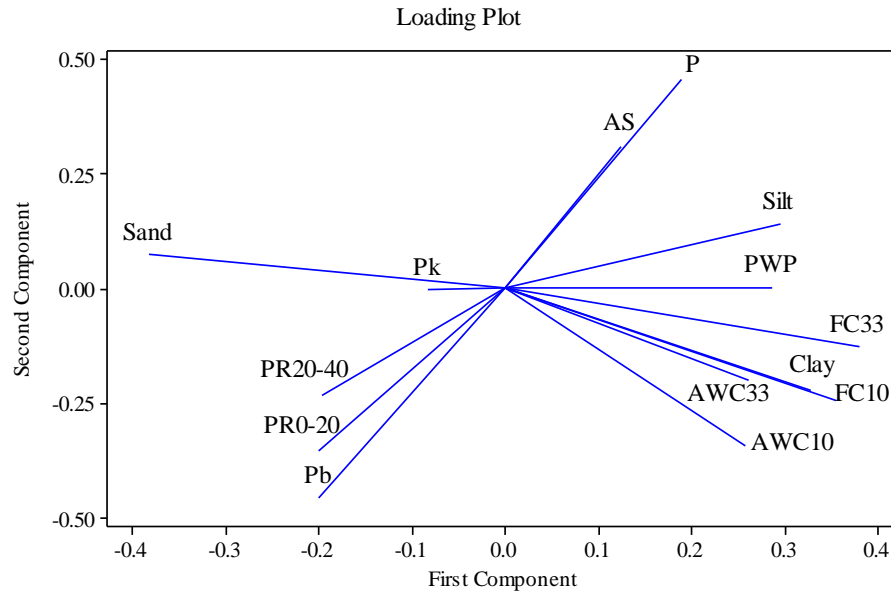

PCA, principle component analysis; Pb, bulk density; Pk, particle density; P, porosity; FC10, field capacity (10 kPa); FC33, field capacity (33 kPa); PWP10, permanent wilting percentage; AW10, available water (10-1500 kPa); AW33, available water (33-1500 kPa); AS, Aggregate stability; PR0-20, penetration resistance (0-20 cm); PR20-40, penetration resistance (20-40 cm).

**Figure 2.** Result of PCA with chemical properties of soil

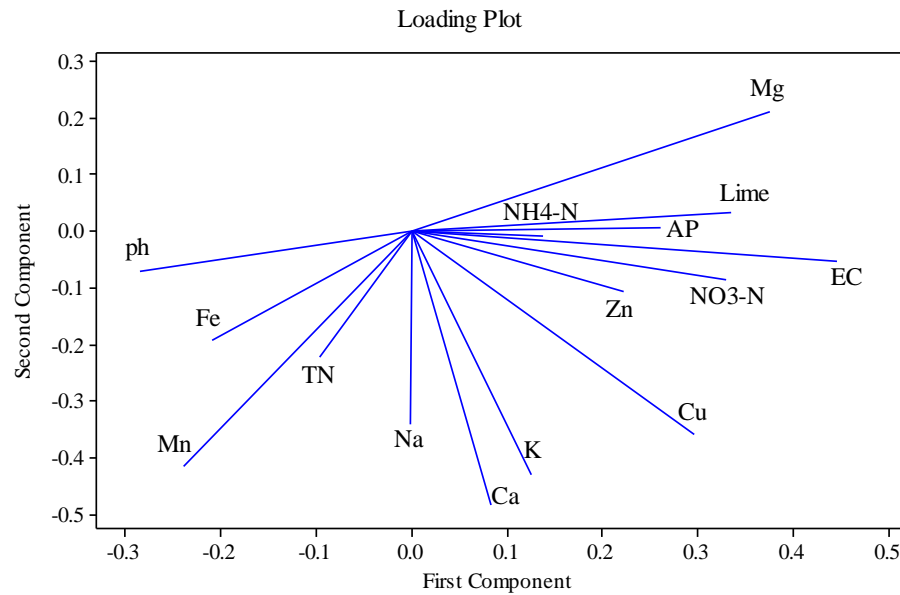

PCA, principle component analysis; TN, total nitrogen; NH<sub>4</sub>-N, Ammonium nitrogen; NO<sub>3</sub>-N, nitrate nitrogen; AP; Available phosphorus.

**Figure 3.** Result of PCA with biological properties of soil

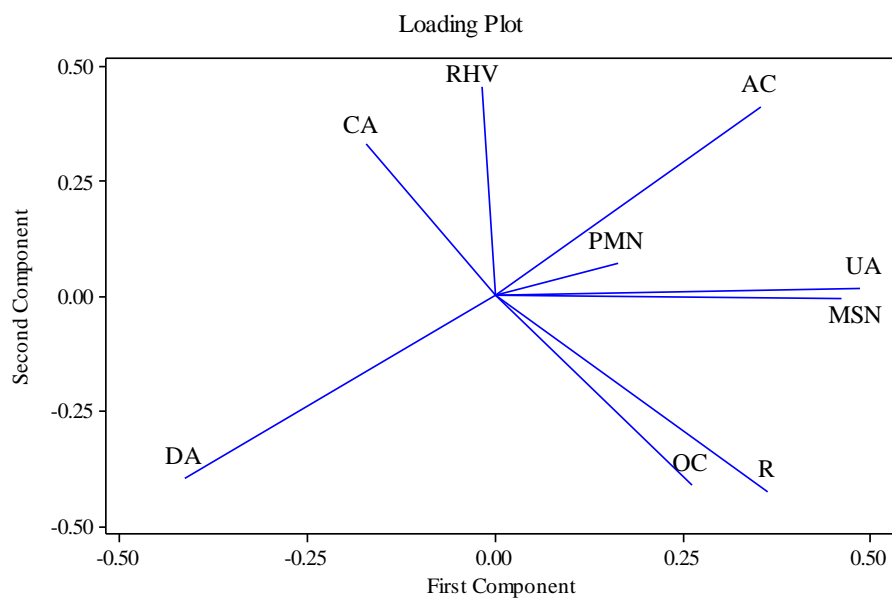

PCA, principle component analysis; OC, organic carbon; AC, active carbon; PMN, Potential mineralizable nitrogen; RHV, root health value; R, respiration; UA urease enzyme activity; CA, catalyzing enzyme activity; DA, dehydrogenase enzyme activity; MSN, mycorrhizal fungi.
