# Supplementary material for: Identification of Regional Soil Quality Factors and Indicators: An Alluvial PlainFrom Central Anatolia
Source: Copernicus journal article supplement (doi:10.5194/se-2016-138), 2016-10-26
Supplement: Supplementary file [file se-2016-138-RC2-supplement.pdf]

**Identification of Regional Soil Quality Factors and Indicators: An Alluvial Plain  
From Central Anatolia**

Cevdet Şeker <sup>a</sup>, Hasan Hüseyin Özyaytekin <sup>a,\*</sup>, Hamza Negiş <sup>a</sup>, İlknur Gümüş <sup>a</sup>, Mert Dedeoğlu <sup>a</sup>, Emel  
Atmaca <sup>a</sup>, Ümmühan Karaca <sup>a</sup>

<sup>a</sup>Selcuk University, Agriculture Faculty, Department of Soil Science and Plant Nutrition, 42079 Konya  
TURKEY

\*Corresponding Author

**Abstract**

Sustainable agriculture largely depends on soil quality (SQ). The evaluation of agricultural soil quality is essential for economic success and environmental stability in rapidly developing regions. A wide variety of methods are currently used to evaluate soil quality using vastly different indicators.

This study was conducted in one of the most important irrigated agriculture areas of Konya in central Anatolia, Turkey, to analyze the soil quality indicators of Çumra County in combination with an indicator selection method, the minimum data set (MDS). A total of 38 soil parameters were used to select the most suitable indicators with the MDS method. We therefore determined a minimum data set with principle component analysis (PCA) to assess soil quality in the study area and soil quality was evaluated on the basis of a scoring function.

Among other soil properties, physical properties, such as field capacity (FC<sub>33</sub>), bulk density (Pb), aggregate stability (AS) and permanent wilting point (WP); chemical properties, such as electrical conductivity (EC), Mn, total nitrogen (TN), available phosphorus (AP), pH and NO<sub>3</sub>-N; and biological properties, such as urease enzyme activity (UA), root health value (RHV), organic carbon (OC), respiration (R) and potentially mineralized nitrogen (PMN) were chosen as an MDS to assess soil quality in the area. According the results this properties were found as the most sensitive indicators of soil quality and they can be used as indicators for evaluating and monitoring soil quality at a regional scale.

Keywords: soil quality, Çumra plain, indicators, minimum data set

## 1. Introduction

Soil is an important non-renewable natural resource on which humanity and all flora and fauna are dependent. The ever increasing growth of the human population has brought about a global food safety problem, and it has become an urgent necessity to obtain greater efficiency per unit area. In developing countries, the intense use of land on the grounds of progress through fast economic development has brought about serious limitations on the sustainable use of soils and created a major problem in soil quality. Furthermore, the negative effects of land degradation from various causes on agricultural productivity and the indirect effects on environmental and food safety and quality of life have also become global problems. Increasing the amount of agricultural lands may seem to be a solution to fulfill the food demand. On the other hand, the amount of agricultural land is already at a maximum level in most countries. Thus, for both the resolution of this problem and the sustainable use of soils, it is much more important to focus on improving the soil quality rather than increasing the amount of arable land (Rasheed *et al.*, 1996; Yemefack *et al.*, 2006).

Soil quality is defined as the capacity of the soil to sustain biological productivity and preserve the environmental quality and health of plants and animals within the boundaries of the ecosystem (Doran and Parkin, 1994). Karlen *et al.* (1997) defined soil quality as the soil's ability to support sustainable plant and animal production, improve human and environmental health, enhance the quality of water and air as the function of the properties of each soil type, and they regarded it as the manifestation of the natural and dynamic properties of soils.

The efficient and sustainable usage of soils, which are among our most important natural resources, can be achieved by defining their properties through proper methods, determining the restrictions that affect their productivity and the properties that affect sustainability.

Assessing and monitoring soil quality can provide effective tools for determining the

properties of degraded soil (Bindraban *et al.*, 2000), revealing sustainable land practices for land managers (McGrath and Zhang, 2003; Karlen *et al.*, 2011) and defining the elements needed for plant nutrition (Yu-Dong *et al.*, 2013). Thus, soil quality has received great attention in the last 15 years. In recent years the number of studies assessing soil quality in different management and product systems has increased worldwide, and several methods and scoring models have been developed for the determination of soil quality.

In the past, soil quality was accepted as the natural capacity of soil that provides the main plant nutrients. However, it is currently regarded as an immaterial property of soils due to its dependency on land usage and soil management practices, ecosystem and environmental interactions, socio-economic and political priorities and several other external factors (Doran and Jones, 1996). So, it is not possible to use a single soil property to digitize soil quality. On the other hand, the combined assessment of several parameters formed by the combination of certain soil properties provides important indicators for monitoring and assessing soil quality.

In general, soil quality parameters are defined as the processes and properties of soil that are sensitive to the changes in soil functions (Doran and Jones, 1996; Aparicio and Costa, 2007).

It is very important to establish simple, sensitive and practical methods for the assessment of soil quality and to select indicators accordingly. The quality parameters to be selected must correlate well with the natural processes in the ecosystem. They must also respond to significant external change in a measurable way, be related to the measurable soil functions (natural or human-based), be integrated with the physical, chemical and biological properties and processes of soil, provide the basic inputs needed for estimating soil properties or functions that are difficult to measured directly, be relatively practical to use in field conditions, and they must be components of the current data bases (Doran and Parkin, 1994; Doran *et al.*, 1996; Chen, 1998; Dumanski and Pieri, 2000; Herrick and Jones, 2002; Aparicio and Costa, 2007).

The following properties are reported to be suitable for use as soil quality factors and indicators when studies on soil quality are evaluated:

Physical properties: texture, bulk density, water retention, aeration, compression, hydraulic properties, aggregation state, consistence properties, and surface crusting (Larson and Pierce, 1991; Arshad and Coen, 1992; Doran and Parkin, 1994; Kay<sup>1</sup> *et al.*, 1996; Burger and Kelting, 1998; Powers *et al.*, 1998); Chemical properties: pH, salt content, total organic carbon, total nitrogen, organic nitrogen, soluble carbon, mineral nitrogen, total phosphorus, extractable ammonium, nitrate, phosphor, potassium, calcium, magnesium, microelements, contaminants, cation change capacity (Doran and Parkin, 1994; Larson and Pierce, 1994; Reganold and Palmer, 1995; Harris *et al.*, 1996); Biological properties: microbial carbon, microbial nitrogen, soil respiration, biological activity, enzyme activities, root development, germination and growth (Turco *et al.*, 1992; Doran and Parkin, 1994; Fauci and Dick, 1994; Gregorich *et al.*, 1994; Linden *et al.*, 1994; Blair *et al.*, 1995; Dick *et al.*, 1996; Harris *et al.*, 1996; Rice *et al.*, 1996); Genetic properties: soil color, type of structure, the thickness and depth of the impermeable layer that is genetically formed, the thickness of horizon A and depth of the clay accumulation horizon (Doran and Parkin, 1994; Brejda *et al.*, 2000a; Brejda *et al.*, 2000b; Qi *et al.*, 2009).

To digitize and reveal out soil quality, it is necessary to determine and score the measurable soil quality parameters. Selection of the indicators to be used is very important for the determination of soil quality. Several properties affect the soil quality in varying degrees.

Many of the above-mentioned physical, chemical and biological parameters are reported to be suitable for use as indicators. On the other hand, the concurrent use of all these properties as quality indicators is both impractical and contrary to the main principles of quality assessment parameters. Doran *et al.* (1996) advised that the number of indicators used to determine soil quality should be as few as possible. In general, the greater the number of indicators, the more

comprehensively the soil quality can be determined. However, when high correlation exists among the indicators, significant effects may emerge as a problem. ~~Carrying out too many soil analyses is also laborious.~~ Therefore, neglecting some indicators should be considered. On the other hand, if the indicators to be neglected are not well selected, non-realistic losses in soil quality may emerge. Therefore, these authors recommended several approaches. They recommended some soil quality indicator sets for the assessment of soil quality based on the total data set (TDS) (Doran and Parkin, 1994; Larson and Pierce, 1994; Karlen *et al.*, 1997). On the other hand, some studies proposed that instead of using all the properties, certain parameters such as the presence or absence of a correlation among the parameters and the measurement practicality could be considered. The MDS formed by representative indicators selected by various methods such as multiple-variant regression analysis (Doran and Parkin, 1994; Li and Lindstrom, 2001), principal components analysis, factor analysis (Brejda *et al.*, 2000b; Shukla *et al.*, 2004) and cluster analysis (Einax and Soldt, 1999) could be used for the determination of soil quality (Andrews *et al.*, 2002; Govaerts *et al.*, 2006; Rezaei *et al.*, 2006). Other authors stated that just as in the Delphi data set (DDS) (Zhang *et al.*, 2004), soil quality could be determined by using the indicators that are selected according to expert views (Herrick and Jones, 2002).

The effective and productive use of soils for many years can be achieved by protecting or improving soil properties. This can be accomplished through approaches that consider the physical, chemical and biological properties of soils and solutions based on these factors. In the Middle Eastern Anatolia region in Turkey, sufficient data are lacking about the general soil quality and the parameters that could be used to determine the soil quality. The Çumra Plain is one of the most fluvial plains in Turkey. In this study, we aimed to select the parameters that could be used to establish regional quality indexes and to determine the variables that affect soil quality.

## 2. MATERIALS AND METHODS

### 2.1. Site description

The study area (Çumra Plain) is a part of the Great Konya Basin in Konya Province, Turkey, is located in the Central Anatolian Plateau (N 37.5° - 37.8° latitude and E 32.5°- 33.3° longitude). The alluvial plains and fans comprise the sediments of several rivers debouching into the southern part of the basin. The alluvial fans or inland deltas consist of sediments ranging from coarse sand to a heavy clay texture. The climate is semi-arid with mild summers and very cold winters. The Konya meteorological station's long-term records show a mean annual precipitation of 296.8 mm, which mostly falls during winter and spring. The total evaporation is 996.6 mm, the mean annual temperature is 10.8°C, and the mean annual soil temperature at 50 cm is 13.1°C (MGM, 2014). The soil moisture and temperature regimes are xeric and mesic, respectively (Staff, 1999).

Detailed soil investigation reports and maps (1:15,000) were used to determine the research area (De Meester, 1970; Meester, 1970, 1971). Physiographically, the study area was a homogenous alluvial plain. When determining the study area on this detailed soil map that was prepared at series and phase levels, we considered the prevalence of the soil series. Accordingly, the *Alibey series*, which covered the largest area in the region, was selected as the study area. This series consists of deep loamy-textured soils formed on the main alluvial fan of the May River. It covers an area of approximately 4000 ha, which represents 6% of the Çumra Plain where irrigated farming is carried out, and is approximately 1023 m above sea level.

### 2.2 Soil Sampling and Analysis

The map of the series, including the coordinate information, was created to determine the points where soil samples would be taken. Samplings and measurements were carried out on

151 108 parcels of land on which wheat and sugar beet were grown in the years 2013-2014 and  
152 the necessary parameters were defined.

153 Degraded samples were taken from different points in each parcel at depths of 0-20 and 20-40  
154 cm and mixed samples were formed for each depth. Mixed samples taken from the surface to  
155 depths of 0-20 cm depth were divided into three subsamples, each of which weighed 1 kg  
~~156 (Karlen *et al.*, 2003; Gugino *et al.*, 2009). One of these subsamples was dried in the~~  
~~157 laboratory, sieved through a 2 mm sieve and used for chemical and physical analyses. The~~  
~~158 second was kept in the cooler for biological analysis. The third subsample was carried to the~~  
~~159 laboratory in proper containers to be used for the determination of aggregate stability. This~~  
~~160 subsample was not ground or sieved and was air dried.~~

161 To determine the texture of the samples, the Bouyoucos hydrometer (Gee and Bauder, 1986)  
162 was used and the oven-dried weight of the non-degraded soil samples was divided into  
163 sample's density to obtain the bulk density ( $P_b$ ) (Blake and Hartge, 1986). The pycnometer  
164 method (Blake and Hartge, 1986) was used to find the particle density ( $P_k$ ) and bulk density  
165 and particle density were used to find porosity ( $P$ ) (Danielson *et al.*, 1986). To find field  
166 capacity ( $F_c$ ), a pressure plate was used to obtain the percentage of humidity remaining in the  
167 soil as weight at pressures of 10 kPa ( $FC_{10}$ ) and 33 kPa ( $FC_{33}$ ) (Klute, 1986). To find the  
168 permanent wilting percentage ( $PWP$ ), a pressure plate was used to obtain the percentage of  
169 humidity left in the soil as weight at 1500 kPa pressure (Klute, 1986), and to obtain the  
170 available water ( $AW$ ), the wilting point was deducted from the field capacities ( $FC_{10}$  and  
171  $FC_{33}$ ). Aggregate stability ( $AS$ ) was determined once the degraded samples taken from the  
172 field at 0-20 cm depth were oven dried at 40 °C (for 5 minutes they were kept under a total  
173 rain of 12.5 mm coming from a simulator with a precipitation intensity of 150 mm hour<sup>-1</sup>)  
174 (Gugino *et al.*, 2009). Penetration resistance was measured using Eijkelkamp's penetrometer,  
175 which is pushed under the soil by hand. Upper-layer penetration resistance ( $PR_{0-20}$ ) was

176 measured by taking the averages of the penetration resistance values at 0-20 cm depth, and  
177 lower-layer penetration resistance ( $PR_{20-40}$ ) was measured by taking the averages of the  
178 penetration resistance values at 20-40 cm depth. The pH among the chemical properties was  
179 measured using a glass electrode digital display pH meter in a 1:1 soil-pure water mixture.  
180 Electrical conductivity (EC) was measured using an electrical conductivity device in a 1:1 soil  
181 and pure water mixture (Kacar, 2009). Total nitrogen was measured using a LECO CN-2000  
182 device with the Dumas dry combustion method (Wright and Bailey, 2001). Ammonium  
183 nitrogen ( $NH_4^+ - N$ ) and nitrate nitrogen ( $NO_3^- - N$ ) were measured using the Kjeldahl  
184 device through  $H_2SO_4$  titration in the solution obtained as a result of distillation first with  
185 MgO and then with Devardo alloy (Keeney and Nelson, 1982). Available phosphorus (AP)  
186 was determined by the Olsen method (Olsen *et al.*, 1982). The solution was extracted using  
187 extractable Ca, Mg, Na and K, 1 N ammonium acetate solution and available Fe, Cu, Mn and  
188 Zn were determined with atomic absorption spectrophotometry through DTPA extraction  
189 (Kacar, 2009). Organic matter was determined by using a LECO CN-2000 device with Dumas  
190 dry combustion (Wright and Bailey, 2001). Active carbon was displayed at 550 nm on the  
191 spectrophotometer in samples with a shaken solution of 0.02 M potassium permanganate  
192 ( $KMnO_4$ ) (Blair *et al.*, 1995; Gugino *et al.*, 2009). Potential mineralizable nitrogen (PMN)  
193 was measured by  $H_2SO_4$  titration in the distilled solution together with MgO in a Kjeldahl  
194 device in extracts obtained from normal and incubated samples and the difference was  
195 obtained (Gugino *et al.*, 2009). Roots of germinated bean plants were removed from the soil  
196 at the end of the blooming period to determine the root health value (RHV) (Gugino *et al.*,  
197 2009). The following activities were determined: urease enzyme activity (UA) (Hoffmann and  
198 Teicher, 1961), catalyzing enzyme activity (CA) (Beck, 1971), dehydrogenase enzyme  
199 activity (DA) (Thalman, 1968), and soil respiration (R) (Isermeyer, 1952). Moreover,  
200 mycorrhizal fungi (MSN) were isolated and counted using 30×–40× enlarged microscopic



201 images of the fungi in samples prepared by washing through 38  $\mu\text{m}$  sieves (Gerdemann and  
202 Nicolson, 1963).

### 203 **2.3 Indicators** **Selection**

204 ~~Selection of the indicators to be used for the determination of soil quality is very important.~~  
205 ~~Though it would be proper to assess all soil properties within the framework of soil quality,~~  
206 ~~this is not practical. This is because several parameters are concerned with the assessment of~~  
207 ~~soil quality, and assessing each of these would require both time and significant costs. Thus, it~~  
208 ~~is necessary to select among the indicators to be used. The important thing here is that the~~  
209 ~~parameters to be used as indicators should reflect the soil primarily in a simple and accurate~~  
210 way (Andrews *et al.*, 2004). Various methods were used to assess soil quality and other  
211 environmental data, such as multiple-variable regression analysis (Doran and Parkin, 1994; Li  
212 and Lindstrom, 2001), principal components and factor analysis (Brejda *et al.*, 2000b; Shukla  
213 *et al.*, 2004), discriminant analysis (Brejda *et al.*, 2000a) and cluster analysis (Einax and  
214 Soldt, 1999).

215 In this study, we used principal components analysis among others to assess and monitor soil  
216 quality. For this purpose, the total data set was divided into three groups first to create the  
217 minimum data set from the total of 38 data sets obtained in the study. Physical properties were  
218 included in the first group, chemical properties in the second and biological properties in the  
219 third group. In the first stage, the Kaiser-Meyer-Olkin (KMO) and Bartlett test was conducted  
220 to verify whether the data included in each group were in conformity with the principal  
221 components analysis (Tatlidil, 2002). All properties had values above 0.5  and passed the  
222 KMO and Bartlett test (Table 1). In the second stage, principal components analysis (PCA)  
223 was conducted for each of four data groups to create the minimum data set and correlation  
224 matrixes of the data sets were established (Minitab, 1995). To determine the parameters that

may take part in the minimum data set, minimum data set recommendations were prepared for each series by considering the component loads determined through PCA, correlation load totals, inter-data correlations and analysis methods.

### 3. RESULTS AND DISCUSSION

#### 3.1. Indicator Selection and Creating the Minimum Data Set

The values concerning the physical, chemical and biological properties obtained at the end of the study are given in Table 2. ~~The KMO and Bartlett tests were conducted to check whether the data sets that were created based on these properties were in conformity with the principal components analysis.~~ The KMO and Bartlett test results are given in Table 1. The following percentages were obtained at the end of the KMO test: 63.4% for the physical properties (0.634>0.5), 66.7% for the chemical properties (0.667>0.50), 62.9% (0.629>0.50) for the biological properties. The Bartlett test results were significant for all the data sets (significance level=0.000<0.05). These results showed that the physical, chemical and biological properties were in conformity with the principal components analysis and showed a high correlation among the variables (Karagöz and Kösterelioğlu, 2015). When selecting the number of principal components, it is necessary to make selections such that the minimum number of principal components can explain 2/3 (67%) of the total variance. This percentage can be increased up to 95%. On the other hand, as it is necessary to work with many principal components to increase the percentage after 67%, this ratio is kept limited and the number of principal components which meets 67% level is generally used. In the principal components test, we used the number of ~~principal components~~ (PC) whose was eigenvalue > 1 and which explained 2/3 of the total variance. This is because one of the most commonly accepted rules is to select the number of principal components that meets the number of R matrix or S matrix eigenvalues that are greater than 1 (Tatlidil, 2002). Therefore, the eigenvalues of the matrixes

were found, and the same number of principal components was selected as the number of eigenvalues with values greater than 1. For selecting the principal component properties to be used to create the minimum data set as quality indicators, we accepted as candidates for the minimum data set those properties whose principal component value had the highest percentage in the components cluster for explaining the variance. Properties such as the principal component loads, correlation load totals, inter-data correlations, and analysis methods were considered when determining the minimum data sets. When deciding which ones to choose among the properties that are highly correlated, we considered issues such as whether the property would be practical and inexpensive and whether a relationship existed between that property and the other properties.

Eigenvalues, variance explanation ratios and total variances of the physical properties of soils at the end of principal component analysis are given in Figure 1. A correlation matrix of the physical properties selected through the principal component analysis is given in Table 3. According to that, the first PC explained 43.7%, the second PC 20.2%, the third PC 8.9% and the fourth PC 7.90% of the variance. As the four PCs explained 80.8% of the total variance and had an eigenvalue  $\geq 1.1113$ , these four PCs were selected. The principal components results of the physical properties are given in Figure 3. The properties that contributed most to the first principal component were Sand (-0.381), Clay (0.294), FC<sub>10</sub> (0.354), FC<sub>33</sub> (0.379) and Silt (0.294); the properties contributing most to the second principal component were Pb (-0.457) and P (0.457); those contributing most to the third principal component were PWP (-0.564), AWC<sub>10</sub> (0.359) and AWC<sub>33</sub> (0.523); and the properties contributing most to the fourth principal component were PR<sub>0-20</sub> (-0.481) and PR<sub>20-40</sub> (-0.662). From the order of PCs achieved by assessing the physical properties of soils, Sand, Clay, FC<sub>10</sub>, FC<sub>33</sub>, Silt, Pb, P, PWP<sub>1500</sub>, AWC<sub>10</sub>, AWC<sub>33</sub>, PR<sub>0-20</sub> and PR<sub>20-40</sub> were qualified for selection as candidates for the minimum data set. However, as it is necessary to use the fewest data in determining soil

quality, we needed to select minimum data sets by considering the component data loads, correlation load totals, inter-data correlations, analysis methods and applicability.

According to these criteria, the correlation load totals of the candidate data in PC1, Sand, Clay, FC<sub>10</sub>, FC<sub>33</sub> and Silt, were 4.352, 3.153, 3.897, 4.099 and 4.209, respectively. It is not possible to change the values of Sand and Clay in practice and they have no sensitivity against the periodic climate and land management changes. Therefore, these two properties were eliminated from the minimum data set. Among the other three properties, FC<sub>33</sub> was the first physical soil property selected for inclusion in the minimum data set, as it had the highest correlation load (4.209), was extensively used and showed correlation with 11 of the physical properties of soil (Table 6). Furthermore, as the high values of FC<sub>33</sub> would mean a greater accumulation of water in the soils, it will be a quality indicator, particularly for dry and semi-dry regions to show that plants are less affected from water stress. This will also be valid for the other regions considering the cost-effective and sustainable use of water. The candidate PB and P data for PC2 had inner total correlation loads of 1.994. Because of a high negative correlation between these two candidate properties ( $R^2 = -0.994$ ;  $p < 0.01$ , Table 9) and P was measured from Pb, Pb was selected as the second physical property of soil for inclusion in the minimum data set. The total inner correlation loads of the candidate properties of PC3, PWP, AWC<sub>10</sub> and AWC<sub>33</sub>, were 1.200, 1.981 and 1.861, respectively. As PWP had the lowest total correlation load among these three properties and a high positive correlation existed between AWC<sub>10</sub> and AWC<sub>33</sub> ( $R^2 = 0.821$ ;  $p < 0.0$ ; Table 9), AWC<sub>10</sub> was included in the minimum data set for PC3. As the candidate data of PC4, PR<sub>0-20</sub> and PR<sub>20-40</sub> indicated the compression at different depths in the soil, both parameters were included in the minimum data set.

 In conclusion, FC<sub>33</sub>, Pb, AWC<sub>10</sub>, PR<sub>0-20</sub> and PR<sub>20-40</sub> among the physical soil quality parameters were included in the minimum data set, and among these selected properties Pb, AWC<sub>10</sub>, PR<sub>0-20</sub> and PR<sub>20-40</sub> are present in common soil quality assessment systems, such as the CSHA or

SMAF (Karlen *et al.*, 1997; Gugino *et al.*, 2009). These selected physical properties are used in the CSHA and SMAF and they were also reported by many researchers as the quality indicators for parameters such as FC<sub>33</sub> that are not included in the CSHA (Erkossa *et al.*, 2007; Rashidi *et al.*, 2010; Yang *et al.*, 2010; Moncada *et al.*, 2014; Sánchez-Navarro *et al.*, 2015).

At the end of the principal component analysis, the eigenvalues of the chemical properties of soils, variance explanation ratios and total ratios are given in Figure 2, and the correlation matrix of the selected chemical properties is given in Table 4. According to this, the first PC explained 29%, the second PC 19.4%, the third PC 10.7% and the fourth PC 8.7% of the variance. As these four PCs explained 67.8% of the total variance and had an eigenvalue  $\geq 1.3042$ , they were selected. The principal components results of the chemical properties are given in Figure 2. The properties that contributed most to the first principal component were EC (0.447), Lime (0.335) and Mg (0.375); the properties contributing most to the second principal component were Ca (-0.484), Na (-0.342), K (-0.431), Cu (-0.359) and Mn (-0.417); the properties contributing most to the third principal component were TN (-0.475), AP (-0.401) and Zn (-0.411); and the properties that contributed most to the fourth principal component were pH (-0.359) and NO<sub>3</sub>-N (0.381).

From the order of the PCs obtained from assessing the chemical properties of soils, EC, Lime, Mg, Ca, Na, K, Cu, Mn, TN, AP, Zn, pH and NO<sub>3</sub>-N qualified as candidates for the minimum data set. However, as it is necessary to use the fewest data in determining the soil quality, minimum data sets were selected. The total inner correlation loads of the candidate properties of PC1, EC, Lime and Mg, were 1.585, 1.839 and 1.962, respectively. Although the total EC correlation load was lower than the other two properties, as the PC load was higher, the region was located in a dry to semi-dry climate zone and significant salification problems existed in certain areas, it was included in the minimum set together with Lime. However, as Mg was

highly correlated with EC ( $R^2=0,623$ ;  $p<0,01$ ) and Lime<sub>0-20</sub> ( $R^2=0,608$ ;  $p<0,01$ ) (Table 6) and the Mg scopes of the soils subject to the study were above the sufficiency level in all samples, it was not included in the minimum data set.

The total inner correlation loads of the candidate properties of PC2, Ca, Na, K, Cu and Mn, were 3.019, 2.280, 2.891 and 2.131, respectively. As Ca had the highest total correlation load among these five properties and Mn remained below the level of sufficiency in certain samples ( $<14.0 \text{ mg Mn kg}^{-1}$  (FAO, 1990)), it was included in the minimum data set. However, as the Cu and K contents of the soils were above the level of sufficiency in all samples ( $>0.2 \text{ mg Cu kg}^{-1}$  (Follett, 1969);  $>110 \text{ mg K kg}^{-1}$  (FAO, 1990)) and Na was not a nutrient element, it was not included in the minimum data set. The total inner correlation loads of the candidate properties of PC3, TN, AP and Zn, were 1.244, 1.543 and 1.443, respectively. No significant correlation existed among these three properties, Zn remained below the sufficiency level ( $>0.7 \text{ mg Zn kg}^{-1}$  presence (FAO, 1990)), P was an important macro nutrient element and TN remained below the sufficiency level in most of the soils studied ( $<0.09\% \text{ N}$ ); thus, they were included in the minimum data sets for TN, AP and Zn. The total inner correlation load of the candidate properties of pH and  $\text{NO}_3\text{-N}$  was 1.425. Soil pH directly affects the usefulness of the nutrient elements.  $\text{NO}_3\text{-N}$  was lacking in our soils, and when it is excessive, it might cause environmental health problems, it was therefore included in the minimum data set. Similarly, pH, AP, Mn and Zn in CSHA and SMAF were also accepted as soil quality parameters (Andrews *et al.*, 2004; Gugino *et al.*, 2009). ). ~~In conclusion,~~ EC, Lime, Mg, Ca, Mn, TN, AP, Zn, pH and  $\text{NO}_3\text{-N}$  among the chemical soil quality parameters were selected as the variables that could be included in minimum data set. Most of these selected properties are also used as quality criteria in the CSHA and SMAF. Several other researchers reported that Lime, Ca, TN and  $\text{NO}_3\text{-N}$  that are not used in these assessment systems could be used as quality indicators

(Mojiri *et al.*, 2011; Baridón and Casas, 2014; Liu *et al.*, 2014; Viana *et al.*, 2014; Zdruli *et al.*, 2014; Benintende *et al.*, 2015; Sánchez-Navarro *et al.*, 2015; Shirani *et al.*, 2015).

From the principal component analysis, the eigenvalues for the biological properties of soils, variance explanation ratios and total ratios are given in Figure 3 and the correlation matrix for the selected physical properties is given in Table 5. The first PC explained 34%, the second PC 23.2% and the third PC 15.3% of the variance. As the three PCs explained 72.5% of the total variance and had an eigenvalue  $\geq 1.3738$ , these three PCs were selected. The properties that contributed most to the first principal component were the amounts of UA (0.486), DA (-0.412) and MSN (0.461); properties that contributed most to the second principal component were OC (-0.410), AC (0.411) and R (-0.426); properties that contributed most to the third principal component were PMN (0.584), RHV (-0.506) and CA (-0.380), and these became candidates for minimum data set. The total inner correlation loads of the candidate properties of PC1, the levels of UA, DA and MSN, were 2.248, 2.044 and 2.184, respectively. As urease had the highest total correlation load among these properties, UA was included in the minimum data set for PC1. Although dehydrogenase was the second property with the highest correlation total, due to the presence of significant correlations both between DA and UA and between DA and AC and the difficulty of determining the amount of MSN, the latter two properties were not included in the minimum data set. The properties that contributed the most to PC2 were OC, AC and R. The correlation load totals of these were 1.680, 1.043 and 1.671, respectively. Among these properties, R and OC, which had the highest principal component coefficient, were included in the minimum set for PC2. Only PMN, RHV and CA were selected as candidates for the PC3 data set. The correlation load totals of PMN, RHV and CA were 1.269, 1.685 and 1.526, respectively. They were included in the minimum data set, as the highest correlation load total was in the RHV. According to the results obtained, OC and R were accepted as soil quality parameters in the CSHA, and OC and R were

accepted as soil quality parameters in the SMAF (Andrews *et al.*, 2004; Gugino *et al.*, 2009; Moebius-Clune *et al.*, 2011). Though urease activity among these selected properties is not listed in the CSHA or SMAF, many other researchers reported that these could be used as quality indicators (Saviozzi *et al.*, 2001; Masto *et al.*, 2007; Baridón and Casas, 2014; Benintende *et al.*, 2015).

#### 4. CONCLUSIONS

This paper discusses the parameters that could be used to monitor the soil quality in the Konya Çumra region, one of the most important agricultural lands in Turkey.

The study also revealed the physical, chemical and biological parameters that could be used to assess the soil quality in the study area and in other areas. The MDS was created for the selection of indicators using the principal component analysis for this purpose. FC<sub>33</sub>, Pb, AW<sub>10</sub>, PR<sub>0-20</sub> and PR<sub>20-40</sub>, among the physical properties; EC, Mg, lime, Ca, Mn, TN, AP, Zn, pH and NO<sub>3</sub>-N among the chemical properties; and UA, OC, R and root health among the biological properties were selected as indicators that could be used in the assessment of soil quality. Score functions for the properties that exist in the CSHA and SMAF among these parameters can be used in scoring. On the other hand, other parameters such as FC<sub>33</sub>, lime, Ca, TN, NO<sub>3</sub>-N and urease were also found to be suitable for use in assessing soil quality. Consequently, scoring functions of these properties must be developed. In this study, the MDS method and principal components analysis were found to be appropriate statistical methods to select the quality indicators.

#### 5. ACKNOWLEDGEMENTS

This study was taken from a research project supported by TUBITAK (Scientific and Technological Research Council of Turkey, Project No.: TOVAG 112O314) and Selçuk



396 University (S.U.) BAP Office (Coordinating Office of Scientific Research Projects, Project  
397 No.: 09201086). The authors would like to thank “the TUBITAK and S.U.-BAP staffs”.

## 398 REFERENCES

399 Andrews, S., Karlen, D., Mitchell, J., 2002. A comparison of soil quality indexing methods for  
400 vegetable production systems in Northern California. *Agriculture, ecosystems & environment* 90, 25-  
401 45.

402 Andrews, S.S., Karlen, D.L., Cambardella, C.A., 2004. The soil management assessment  
403 framework. *Soil Science Society of America Journal* 68, 1945-1962.

404 Aparicio, V., Costa, J.L., 2007. Soil quality indicators under continuous cropping systems in  
405 the Argentinean Pampas. *Soil and Tillage Research* 96, 155-165.

406 Arshad, M., Coen, G., 1992. Characterization of soil quality: physical and chemical criteria.  
407 *American Journal of Alternative Agriculture* 7, 25-31.

408 Baridón, J.E., Casas, R.R., 2014. Quality indicators in subtropical soils of Formosa, Argentina:  
409 Changes for agriculturization process. *International Soil and Water Conservation Research* 2, 13-24.

410 Beck, T., 1971. Die messung der katalaseaktivitaet von Böden. *Zeitschrift für*  
411 *Pflanzenernährung und Bodenkunde* 130, 68-81.

412 Benintende, S., Benintende, M., Sterren, M., Saluzzio, M., Barbagelata, P., 2015. Biological  
413 variables as soil quality indicators: Effect of sampling time and ability to classify soils by their  
414 suitability. *Ecological Indicators* 52, 147-152.

415 Bindraban, P., Stoorvogel, J., Jansen, D., Vlaming, J., Groot, J., 2000. Land quality indicators  
416 for sustainable land management: proposed method for yield gap and soil nutrient balance.  
417 *Agriculture, Ecosystems & Environment* 81, 103-112.

418 Blair, G.J., Lefroy, R.D., Lisle, L., 1995. Soil carbon fractions based on their degree of  
419 oxidation, and the development of a carbon management index for agricultural systems. *Crop and*  
420 *Pasture Science* 46, 1459-1466.

421 Blake, G., Hartge, K., 1986. Particle density. *Methods of Soil Analysis: Part 1—Physical and*  
422 *Mineralogical Methods*, 377-382.

423 Brejda, J.J., Karlen, D.L., Smith, J.L., Allan, D.L., 2000a. Identification of regional soil quality  
424 factors and indicators II. Northern Mississippi Loess Hills and Palouse Prairie. *Soil Science Society of*  
425 *America Journal* 64, 2125-2135.

426 Brejda, J.J., Moorman, T.B., Karlen, D.L., Dao, T.H., 2000b. Identification of regional soil  
427 quality factors and indicators I. Central and Southern High Plains. *Soil Science Society of America*  
428 *Journal* 64, 2115-2124.

429 Burger, J.A., Kelting, D.L., 1998. Soil quality monitoring for assessing sustainable forest  
430 management. The contribution of soil science to the development of and implementation of criteria  
431 and indicators of sustainable forest management, 17-52.

432 Chen, Z., 1998. Selecting the indicators to evaluate the soil quality of Taiwan soils and  
433 approaching the national level of sustainable soil management. *Proceedings of international seminar*  
434 *on soil management for sustainable agriculture in the tropics*, pp. 131-171.

435 Danielson, R., Sutherland, P., Klute, A., 1986. Porosity. *Methods of soil analysis. Part 1.*  
436 *Physical and mineralogical methods*, 443-461.

437 De Meester, T., 1970. Soils of the Great Konya Basin, Turkey. *Agric. Res. Rep* 740, 290.

438 Dick, R.P., Breakwell, D.P., Turco, R.F., Doran, J., Jones, A., 1996. Soil enzyme activities and  
439 biodiversity measurements as integrative microbiological indicators. *Methods for assessing soil*  
440 *quality.*, 247-271.

441 Doran, J.W., Jones, A.J., 1996. *Methods for assessing soil quality.* Soil Science Society of  
442 America Inc.

443 Doran, J.W., Parkin, T.B., 1994. Defining and assessing soil quality. *Defining soil quality for a*  
444 *sustainable environment*, 1-21.

445 Doran, J.W., Parkin, T.B., Jones, A., 1996. Quantitative indicators of soil quality: a minimum  
446 data set. *Methods for assessing soil quality.*, 25-37.

447 Dumanski, J., Pieri, C., 2000. Land quality indicators: research plan. Agriculture, Ecosystems &  
 448 Environment 81, 93-102.

449 Einax, J., Soldt, U., 1999. Geostatistical and multivariate statistical methods for the  
 450 assessment of polluted soils—merits and limitations. Chemometrics and Intelligent Laboratory  
 451 Systems 46, 79-91.

452 Erkossa, T., Itanna, F., Stahr, K., 2007. Indexing soil quality: a new paradigm in soil science  
 453 research. Soil Research 45, 129-137.

454 FAO, 1990. Micronutrient Assessment at The Country Level p 1-208. An international study  
 455 (Ed., M. Sillanpa). FAO Soil Bulletin 63. Published by FAO, Rome, Italy.

456 Fauci, M.F., Dick, R.P., 1994. Microbial biomass as an indicator of soil quality: Effects of long-  
 457 term management and recent soil amendments. Defining soil quality for a sustainable environment,  
 458 229-234.

459 Follett, R.H., 1969. Zn, Fe, Mn, and Cu in Colorado soils.

460 Gee, G., Bauder, J., 1986. Particle-size analysis In: Klute, A.(ed) Methods of soil analysis, Part  
 461 1. American society of Agronomy. Inc., Ma.

462 Gerdemann, J., Nicolson, T.H., 1963. Spores of mycorrhizal Endogone species extracted from  
 463 soil by wet sieving and decanting. Transactions of the British Mycological society 46, 235-244.

464 Govaerts, B., Sayre, K.D., Deckers, J., 2006. A minimum data set for soil quality assessment of  
 465 wheat and maize cropping in the highlands of Mexico. Soil and Tillage Research 87, 163-174.

466 Gregorich, E., Monreal, C., Carter, M., Angers, D., Ellert, B., 1994. Towards a minimum data  
 467 set to assess soil organic matter quality in agricultural soils. Canadian journal of soil science 74, 367-  
 468 385.

469 Gugino, B.K., Abawi, G.S., Idowu, O.J., Schindelbeck, R.R., Smith, L.L., Thies, J.E., Wolfe, D.W.,  
 470 Van Es, H.M., 2009. Cornell soil health assessment training manual. Cornell University College of  
 471 Agriculture and Life Sciences.

472 Harris, R.F., Karlen, D.L., Mulla, D.J., Doran, J., Jones, A., 1996. A conceptual framework for  
 473 assessment and management of soil quality and health. *Methods for assessing soil quality.*, 61-82.

474 Herrick, J.E., Jones, T.L., 2002. A dynamic cone penetrometer for measuring soil penetration  
 475 resistance. *Soil Science Society of America Journal* 66, 1320-1324.

476 Hoffmann, G., Teicher, K., 1961. Ein kolorimetrisches Verfahren zur Bestimmung der  
 477 Ureaseaktivität in Böden. *Zeitschrift für Pflanzenernährung, Düngung, Bodenkunde* 95, 55-63.

478 Isermeyer, H., 1952. Eine einfache Methode zur Bestimmung der Bodenatmung und der  
 479 Karbonate im Boden. *Zeitschrift für Pflanzenernährung, Düngung, Bodenkunde* 56, 26-38.

480 Kacar, B., 2009. Toprak analizleri. Nobel Yayın Dağıtım.

481 Karagöz, Y., Kösterelioğlu, İ., 2015. İletişim becerileri değerlendirme ölçeğinin faktör analizi  
 482 metodu ile geliştirilmesi. *Dumlupınar Üniversitesi Sosyal Bilimler Dergisi* 21.

483 Karlen, D., Mausbach, M., Doran, J., Cline, R., Harris, R., Schuman, G., 1997. Soil quality: a  
 484 concept, definition, and framework for evaluation (a guest editorial). *Soil Science Society of America*  
 485 *Journal* 61, 4-10.

486 Karlen, D.L., Birell, S.J., Hess, J.R., 2011. A five-year assessment of corn stover harvest in  
 487 central Iowa, USA. *Soil and Tillage Research* 115, 47-55.

488 Karlen, D.L., Ditzler, C.A., Andrews, S.S., 2003. Soil quality: why and how? *Geoderma* 114,  
 489 145-156.

490 Kay<sup>1</sup>, B., Grant, C., Australia, S., 1996. Structural aspects of soil quality. *Soil Quality is in the*  
 491 *Hands of the Land Manager*, 37.

492 Keeney, D.R., Nelson, D., 1982. Nitrogen—inorganic forms. *Methods of soil analysis. Part 2.*  
 493 *Chemical and microbiological properties*, 643-698.

494 Klute, A., 1986. Water retention: laboratory methods. *Methods of Soil Analysis: Part 1—*  
 495 *Physical and Mineralogical Methods*, 635-662.

496 Larson, W., Pierce, F., 1991. Conservation and enhancement of soil quality. *Evaluation for*  
 497 *sustainable land management in the developing world: proceedings of the International Workshop*

498 on Evaluation for Sustainable Land Management in the Developing World, Chiang Rai, Thailand, 15-  
 499 21 September 1991. [Bangkok, Thailand: International Board for Soil Research and Management,  
 500 1991].

501 Larson, W.E., Pierce, F.J., 1994. The dynamics of soil quality as a measure of sustainable  
 502 management. *Defining soil quality for a sustainable environment*, 37-51.

503 Li, Y., Lindstrom, M., 2001. Evaluating soil quality–soil redistribution relationship on terraces  
 504 and steep hillslope. *Soil Science Society of America Journal* 65, 1500-1508.

505 Linden, D.R., Hendrix, P.F., Coleman, D.C., van Vliet, P.C., 1994. Faunal indicators of soil  
 506 quality. *Defining soil quality for a sustainable environment*, 91-106.

507 Liu, Z., Zhou, W., Shen, J., Li, S., He, P., Liang, G., 2014. Soil quality assessment of Albic soils  
 508 with different productivities for eastern China. *Soil and Tillage Research* 140, 74-81.

509 Masto, R.E., Chhonkar, P.K., Singh, D., Patra, A.K., 2007. Soil quality response to long-term  
 510 nutrient and crop management on a semi-arid Inceptisol. *Agriculture, Ecosystems & Environment*  
 511 118, 130-142.

512 McGrath, D., Zhang, C., 2003. Spatial distribution of soil organic carbon concentrations in  
 513 grassland of Ireland. *Applied Geochemistry* 18, 1629-1639.

514 Meester, T.d., 1970. *Soils of the Great Konya Basin, Turkiye*. Wageningen: Pudoc, Centre for  
 515 Agricultural Publishing and Documentation.

516 Meester, T.d., 1971. *Highly calcareous lacustrine soils in the Great Konya Basin, Turkey*.  
 517 Pudoc, Wageningen, The Netherlands.

518 MGM, 2014. *Müdürlüğü, Meteoroloji Genel İklim Verileri*. Meteoroloji Genel Müdürlüğü.

519 Minitab, 1995. *Minitab reference manual (Release 7.1)*. Minitab Inc., State Coll PA, 16801,  
 520 USA.

521 Moebius-Clune, B., Idowu, O., Schindelbeck, R., Van Es, H., Wolfe, D., Abawi, G., Gugino, B.,  
 522 2011. Developing standard protocols for soil quality monitoring and assessment. *Innovations as key*  
 523 *to the green revolution in Africa*. Springer, pp. 833-842.

524 Mojiri, A., Kazemi, Z., Amirossadat, Z., 2011. Effects of land use changes and hillslope position  
 525 on soil quality attributes (A case study: Fereydoonshahr, Iran). *African journal of Agricultural research*  
 526 6, 1114-1119.

527 Moncada, M.P., Gabriels, D., Cornelis, W.M., 2014. Data-driven analysis of soil quality  
 528 indicators using limited data. *Geoderma* 235, 271-278.

529 Olsen, S., Sommers, L., Page, A., 1982. Methods of soil analysis. Part 2. *Agron. Monogr* 9, 403-  
 530 430.

531 Powers, R.F., Tiarks, P., Boyle, J.R., 1998. Assessing soil quality: practicable standards for  
 532 sustainable forest productivity in the United States. The contribution of soil science to the  
 533 development of and implementation of criteria and indicators of sustainable forest management, 53-  
 534 80.

535 Qi, Y., Darilek, J.L., Huang, B., Zhao, Y., Sun, W., Gu, Z., 2009. Evaluating soil quality indices in  
 536 an agricultural region of Jiangsu Province, China. *Geoderma* 149, 325-334.

537 Rasheed, S., Li, Z., Xu, D., Kovacs, A., 1996. Presence of cell-free human immunodeficiency  
 538 virus in cervicovaginal secretions is independent of viral load in the blood of human  
 539 immunodeficiency virus-infected women. *American journal of obstetrics and gynecology* 175, 122-  
 540 130.

541 Rashidi, M., Seilsepour, M., Ranjbar, I., Gholami, M., Abbassi, S., 2010. Evaluation of some soil  
 542 quality indicators in the Varamin region, Iran. *World Applied Sciences Journal* 9, 101-108.

543 Reganold, J.P., Palmer, A.S., 1995. Significance of gravimetric versus volumetric  
 544 measurements of soil quality under biodynamic, conventional, and continuous grass management.  
 545 *Journal of Soil and Water Conservation* 50, 298-305.

546 Rezaei, S.A., Gilkes, R.J., Andrews, S.S., 2006. A minimum data set for assessing soil quality in  
 547 rangelands. *Geoderma* 136, 229-234.

548 Rice, C.W., Moorman, T.B., Beare, M., 1996. Role of microbial biomass carbon and nitrogen in  
 549 soil quality. *Methods for assessing soil quality*, 203-215.

550 Sánchez-Navarro, A., Gil-Vázquez, J., Delgado-Iniesta, M., Marín-Sanleandro, P., Blanco-  
 551 Bernardeau, A., Ortiz-Silla, R., 2015. Establishing an index and identification of limiting parameters  
 552 for characterizing soil quality in Mediterranean ecosystems. *Catena* 131, 35-45.

553 Saviozzi, A., Levi-Minzi, R., Cardelli, R., Riffaldi, R., 2001. A comparison of soil quality in  
 554 adjacent cultivated, forest and native grassland soils. *Plant and soil* 233, 251-259.

555 Shirani, H., Habibi, M., Besalatpour, A., Esfandiarpour, I., 2015. Determining the features  
 556 influencing physical quality of calcareous soils in a semiarid region of Iran using a hybrid PSO-DT  
 557 algorithm. *Geoderma* 259, 1-11.

558 Shukla, M., Lal, R., Ebinger, M., 2004. SOIL QUALITY INDICATORS FOR THE NORTH  
 559 APPALACHIAN EXPERIMENTALWATERSHEDS IN COSHOCTON OHIO. *Soil Science* 169, 195-205.

560 Staff, S.S., 1999. Keys to soil taxonomy. Soil Conservation Service.

561 Tatlidil, H., 2002. Uygulamali çok degiskenli istatistiksel analiz. Ankara: Cem Web Ofset Ltd.  
 562 Sti, 424.

563 Thalmann, A., 1968. Zur Methodik der bestimmung der dehydrogenaseaktivität im boden  
 564 mittels triphenyltetrazoliumchlorid (TTC). *Landwirtsch. Forsch* 21, 249-258.

565 Turco, R., Kennedy, A., Jawson, M., 1992. Microbial indicators of soil quality. Purdue Univ.,  
 566 Lafayette, IN (United States).

567 Viana, R.M., Ferraz, J.B., Neves, A.F., Vieira, G., Pereira, B.F., 2014. Soil quality indicators for  
 568 different restoration stages on Amazon rainforest. *Soil and Tillage Research* 140, 1-7.

569 Wright, A.F., Bailey, J.S., 2001. Organic carbon, total carbon, and total nitrogen  
 570 determinations in soils of variable calcium carbonate contents using a Leco CN-2000 dry combustion  
 571 analyzer. *Communications in Soil Science and Plant Analysis* 32, 3243-3258.

572 Yang, J., Kim, S., Ok, Y., Lee, H., Kim, D., Kim, K., 2010. Determining minimum data set for soil  
 573 quality assessment of organic farming system in Korea. 19th World Congress of Soil Science, Soil  
 574 Solutions for a Changing World, pp. 1-6.

575 Yemefack, M., Jetten, V.G., Rossiter, D.G., 2006. Developing a minimum data set for  
 576 characterizing soil dynamics in shifting cultivation systems. *Soil and Tillage Research* 86, 84-98.  
 577 Yu-Dong, C., Huo-Yan, W., Jian-Min, Z., Lu, X., Bai-Shu, Z., Yong-Cun, Z., Xiao-Qin, C., 2013.  
 578 Minimum data set for assessing soil quality in farmland of northeast China. *Pedosphere* 23, 564-576.  
 579 Zdruli, P., Calabrese, J., Ladisa, G., Otekhile, A., 2014. Impacts of land cover change on soil  
 580 quality of manmade soils cultivated with table grapes in the Apulia Region of south-eastern Italy.  
 581 *Catena* 121, 13-21.  
 582 Zhang, B., Zhang, Y., Chen, D., White, R., Li, Y., 2004. A quantitative evaluation system of soil  
 583 productivity for intensive agriculture in China. *Geoderma* 123, 319-331.



584 **Table 1.** Physical, Chemical and Biological Data Sets Belonging to the KMO and Barlett Sphericity Test  
585

|                                                  | Physical<br>Properties | Chemical<br>Properties | Biological<br>Properties |
|--------------------------------------------------|------------------------|------------------------|--------------------------|
| Kaiser-Meyer-Olkin Measure of Sampling Adequacy  | 0.634                  | 0.667                  | 0.629                    |
| Bartlett's Test of Sphericity Approx. Chi-Square | 3967.603               | 977.069                | 453.937                  |
| Sphericity                                       | 91                     | 105                    | 36                       |
| Significance level                               | 0.000                  | 0.000                  | 0.000                    |

586

**Table 2.** Physical, Chemical and Biological Properties of Soil at Sampling Sites.

| Parameters            | Variable            |                                         | Mean   | %CV   | Min.   | Max.   |
|-----------------------|---------------------|-----------------------------------------|--------|-------|--------|--------|
| Physical Properties   | Sand                | %                                       | 40.32  | 27.55 | 17.10  | 61.88  |
|                       | Silt                | %                                       | 25.17  | 24.03 | 11.60  | 40.00  |
|                       | Clay                | %                                       | 34.52  | 21.76 | 18.05  | 53.53  |
|                       | Pb                  | g cm <sup>-3</sup>                      | 1.35   | 8.80  | 1.10   | 1.63   |
|                       | Pk                  | g cm <sup>-3</sup>                      | 2.64   | 0.99  | 2.54   | 2.71   |
|                       | P                   | %                                       | 48.85  | 9.22  | 38.38  | 58.00  |
|                       | FC <sub>10</sub>    | g g <sup>-1</sup>                       | 0.32   | 16.55 | 0.22   | 0.46   |
|                       | FC <sub>33</sub>    | g g <sup>-1</sup>                       | 0.24   | 17.17 | 0.17   | 0.38   |
|                       | PWP                 | g g <sup>-1</sup>                       | 0.14   | 21.92 | 0.10   | 0.25   |
|                       | AWC <sub>10</sub>   | g g <sup>-1</sup>                       | 0.18   | 21.61 | 0.09   | 0.29   |
|                       | AWC <sub>33</sub>   | g g <sup>-1</sup>                       | 0.10   | 27.36 | 0.04   | 0.20   |
|                       | AS                  | %                                       | 17.84  | 56.07 | 4.83   | 52.32  |
|                       | PR <sub>0-20</sub>  | PSI                                     | 208.08 | 37.70 | 83.00  | 415    |
|                       | PR <sub>20-40</sub> | PSI                                     | 314.82 | 31.32 | 147.00 | 689    |
| Chemical Properties   | pH                  | -                                       | 8.03   | 1.98  | 7.34   | 8.29   |
|                       | EC                  | -                                       | 523.50 | 48.08 | 243.00 | 1748   |
|                       | Lime                | %                                       | 8.97   | 20.33 | 6.47   | 16.48  |
|                       | TN                  | %                                       | 0.08   | 35.65 | 0.03   | 0.16   |
|                       | NH <sub>4</sub> -N  | mg kg <sup>-1</sup>                     | 17.13  | 30.56 | 7.00   | 44.89  |
|                       | NO <sub>3</sub> -N  | mg kg <sup>-1</sup>                     | 25.07  | 83.61 | 3.46   | 129.88 |
|                       | AP                  | mg kg <sup>-1</sup>                     | 12.97  | 50.80 | 3.36   | 37.79  |
|                       | Ca                  | mg kg <sup>-1</sup>                     | 5089   | 28.82 | 2622   | 8160   |
|                       | Mg                  | mg kg <sup>-1</sup>                     | 818.90 | 53.54 | 220    | 1925   |
|                       | Na                  | mg kg <sup>-1</sup>                     | 82.36  | 38.41 | 25.00  | 203    |
|                       | K                   | mg kg <sup>-1</sup>                     | 577.50 | 33.95 | 307    | 1356   |
|                       | Fe                  | mg kg <sup>-1</sup>                     | 7.52   | 33.53 | 3.65   | 14.38  |
|                       | Cu                  | mg kg <sup>-1</sup>                     | 1.29   | 29.61 | 0.45   | 2.06   |
|                       | Mn                  | mg kg <sup>-1</sup>                     | 15.82  | 38.81 | 5.45   | 25.97  |
|                       | Zn                  | mg kg <sup>-1</sup>                     | 1.10   | 43.10 | 0.26   | 3.77   |
| Biological Properties | OC                  | %                                       | 0.71   | 31.90 | 0.29   | 1.43   |
|                       | AC                  | mg kg <sup>-1</sup>                     | 486.70 | 49.25 | 96     | 996    |
|                       | PMN                 | μg g <sup>-1</sup> w <sup>-1</sup>      | 9.59   | 50.37 | 0.51   | 20.26  |
|                       | RHV                 | -                                       | 3.90   | 40.29 | 1.00   | 8.00   |
|                       | R                   | mg 100g <sup>-1</sup> 24h <sup>-1</sup> | 25.56  | 23.42 | 11.37  | 39.27  |
|                       | CA                  | mgO <sub>2</sub> 5g <sup>-1</sup>       | 6.56   | 41.33 | 1.87   | 16.20  |
|                       | UA                  | μgN g <sup>-1</sup>                     | 189.20 | 90.49 | 17.80  | 581    |
|                       | DA                  | μgTPF g <sup>-1</sup>                   | 2.29   | 69.26 | 0.12   | 5.87   |
|                       | MSN                 | number 10g <sup>-1</sup>                | 60.90  | 78.16 | 5.83   | 259    |

588 Pb, bulk density; Pk, particle density; P, porosity; FC<sub>10</sub>, field capacity (10 kPa); FC<sub>33</sub>, field capacity (33 kPa);  
 589 PWP<sub>10</sub>, permanent wilting percentage; AW<sub>10</sub>, available water (10-1500 kPa); AW<sub>33</sub>, available water (33-1500  
 590 kPa); AS, Aggregate stability; PR<sub>0-20</sub>, penetration resistance (0-20 cm); PR<sub>20-40</sub>, penetration resistance (20-40  
 591 cm); TN, total nitrogen; NH<sub>4</sub>-N, Ammonium nitrogen; NO<sub>3</sub>-N, nitrate nitrogen; YP; Available phosphorus; OC,  
 592 organic carbon; AC, active carbon; PMN, Potential mineralizable nitrogen; RHV, root health value; R,  
 593 respiration; UA urease enzyme activity; CA, catalyzing enzyme activity; DA, dehydrogenase enzyme activity,  
 594 MSN, mycorrhizal fungi number.

**Table 3.** Principal components analysis of the matrix of correlation of the selected physical properties

| PC1 variables       | Sand               | Silt                  | Clay                  | FC <sub>10</sub> | FC <sub>33</sub> |
|---------------------|--------------------|-----------------------|-----------------------|------------------|------------------|
| Sand                | 1                  | -0,770                | -0,858                | -0,843           | -0,881           |
| Silt                | -0,770             | 1                     | 0,334                 | 0,485            | 0,564            |
| Clay                | -0,858             | 0,334                 | 1                     | 0,856            | 0,849            |
| FC <sub>10</sub>    | -0,843             | 0,485                 | 0,856                 | 1                | 0,915            |
| FC <sub>33</sub>    | -0,881             | 0,564                 | 0,849                 | 0,915            | 1                |
| Total               | 4,352              | 3,153                 | 3,897                 | 4,099            | <b>4,209</b>     |
| PC2 variables       | Pb                 | P                     |                       |                  |                  |
| Pb                  | 1                  | -0,994                |                       |                  |                  |
| P                   | -0,994             | 1                     |                       |                  |                  |
| Total               | <b>1,994</b>       | 1,994                 |                       |                  |                  |
| PC3 variables       | PWP                | AW <sub>10-1500</sub> | AW <sub>33-1500</sub> |                  |                  |
| PWP                 | 1                  | 0,160                 | 0,040                 |                  |                  |
| AWC <sub>10</sub>   | 0,160              | 1                     | 0,821                 |                  |                  |
| AWC <sub>33</sub>   | 0,040              | 0,821                 | 1                     |                  |                  |
| Total               | 1,200              | <b>1,981</b>          | 1,861                 |                  |                  |
| PC4 variables       | PR <sub>0-20</sub> | PR <sub>20-40</sub>   |                       |                  |                  |
| PR <sub>0-20</sub>  | 1                  | 0,788                 |                       |                  |                  |
| PR <sub>20-40</sub> | 0,788              | 1                     |                       |                  |                  |
| Total               | <b>1,788</b>       | <b>1,788</b>          |                       |                  |                  |

**Table 4.** Principal Components Analysis of the Matrix of Correlation of the Selected Chemical Properties

| PC1 variables      | EC           | Lime               | Mg           |       |              |
|--------------------|--------------|--------------------|--------------|-------|--------------|
| EC                 | 1            | -0,231             | -0,354       |       |              |
| Lime               | -0,231       | 1                  | 0,608        |       |              |
| Mg                 | -0,354       | 0,608              | 1            |       |              |
| Total              | <b>1,585</b> | <b>1,839</b>       | <b>1,962</b> |       |              |
| PC2 variables      | Ca           | Na                 | K            | Cu    | Mn           |
| Ca                 | 1            | 0,308              | 0,539        | 0,756 | 0,416        |
| Na                 | 0,308        | 1                  | 0,415        | 0,243 | 0,314        |
| K                  | 0,539        | 0,415              | 1            | 0,566 | 0,371        |
| Cu                 | 0,756        | 0,243              | 0,566        | 1     | 0,030        |
| Mn                 | 0,416        | 0,314              | 0,371        | 0,030 | 1            |
| Total              | <b>3,019</b> | 2,280              | 2,891        | 2,595 | <b>2,131</b> |
| PC3 variables      | TN           | AP                 | Zn           |       |              |
| TN                 | 1            | 0,172              | 0,072        |       |              |
| AP                 | 0,172        | 1                  | 0,371        |       |              |
| Zn                 | 0,072        | 0,371              | 1            |       |              |
| Total              | <b>1,244</b> | <b>1,543</b>       | <b>1,443</b> |       |              |
| PC4 variables      | pH           | NO <sub>3</sub> -N |              |       |              |
| pH                 | 1            | -0,425             |              |       |              |
| NO <sub>3</sub> -N | -0,425       | 1                  |              |       |              |
| Total              | <b>1,425</b> | <b>1,425</b>       |              |       |              |

**Table 5.** Principal Components Analysis of the Matrix of Correlation of the Selected Physical Properties

| PC1 variables | UA           | DA           | MSN          |
|---------------|--------------|--------------|--------------|
| UA            | 1            | -0,554       | 0,694        |
| DA            | -0,554       | 1            | -0,490       |
| MSN           | 0,694        | -0,490       | 1            |
| Total         | <b>2,248</b> | 2,044        | 2,184        |
| PC2 variables | OC           | AC           | R            |
| OC            | 1            | -0,026       | 0,654        |
| AC            | -0,026       | 1            | 0,017        |
| R             | 0,654        | 0,017        | 1            |
| Total         | <b>1,680</b> | <b>1,043</b> | <b>1,671</b> |
| PC3 variables | PMN          | RHV          | CA           |
| PMN           | 1            | -0,214       | -0,055       |
| RHV           | -0,214       | 1            | 0,471        |
| CA            | -0,055       | 0,471        | 1            |
| Total         | 1,269        | <b>1,685</b> | 1,526        |

600

Table 6. Correlation matrix of physical, chemical and biological properties of soils

|                       |                     | Sand                | Silt     | Clay     | Pb       | Pk                 | P                  | FC <sub>10</sub> | FC <sub>33</sub> | PWP      | AWC <sub>10</sub> | AWC <sub>33</sub> | PR <sub>0-20</sub> | PR <sub>20-40</sub> |       |
|-----------------------|---------------------|---------------------|----------|----------|----------|--------------------|--------------------|------------------|------------------|----------|-------------------|-------------------|--------------------|---------------------|-------|
| Physical Properties   | Silt                | -0,770**            |          |          |          |                    |                    |                  |                  |          |                   |                   |                    |                     |       |
|                       | Clay                | -0,858**            | 0,334**  |          |          |                    |                    |                  |                  |          |                   |                   |                    |                     |       |
|                       | Pb                  | 0,375**             | -0,547** | -0,114   |          |                    |                    |                  |                  |          |                   |                   |                    |                     |       |
|                       | Pk                  | 0,182 <sup>na</sup> | -0,147   | -0,151   | 0,062    |                    |                    |                  |                  |          |                   |                   |                    |                     |       |
|                       | P                   | -0,353**            | 0,532**  | 0,095    | -0,994** | 0,048              |                    |                  |                  |          |                   |                   |                    |                     |       |
|                       | FC <sub>10</sub>    | -0,843**            | 0,485**  | 0,856**  | -0,115   | -0,148             | 0,096              |                  |                  |          |                   |                   |                    |                     |       |
|                       | FC <sub>33</sub>    | -0,881**            | 0,564**  | 0,849**  | -0,295** | -0,146             | 0,277**            | 0,915**          |                  |          |                   |                   |                    |                     |       |
|                       | PWP                 | -0,689**            | 0,374**  | 0,718**  | -0,285** | -0,132             | 0,268**            | 0,704**          | 0,763**          |          |                   |                   |                    |                     |       |
|                       | AWC <sub>10</sub>   | -0,602**            | 0,361**  | 0,599**  | 0,073    | -0,102             | -0,087             | 0,808**          | 0,644**          | 0,160    |                   |                   |                    |                     |       |
|                       | AWC <sub>33</sub>   | -0,574**            | 0,446**  | 0,489**  | -0,132   | -0,071             | 0,123              | 0,612**          | 0,664**          | 0,040    | 0,821**           |                   |                    |                     |       |
|                       | AS                  | -0,174              | 0,220*   | 0,080    | -0,525** | -0,223*            | 0,499**            | 0,087            | 0,165            | 0,157    | -0,004            | 0,087             |                    |                     |       |
|                       | PR <sub>0-20</sub>  | 0,334**             | -0,416** | -0,159   | 0,520**  | 0,089              | -0,507**           | -0,232           | -0,334**         | -0,352** | 0,022             | -0,127            | -0,313**           |                     |       |
|                       | PR <sub>20-40</sub> | 0,328**             | -0,350** | -0,204*  | 0,333**  | 0,116              | -0,316**           | -0,232           | -0,349**         | -0,296** | -0,114            | -0,219**          | -0,199**           | 0,788**             |       |
|                       |                     | pH                  | EC       | Lime     | TN       | NH <sub>4</sub> -N | NO <sub>3</sub> -N | AP               | Ca               | Mg       | Na                | K                 | Fe                 | Cu                  | Mn    |
| Chemical Properties   | EC                  | -0,604**            |          |          |          |                    |                    |                  |                  |          |                   |                   |                    |                     |       |
|                       | Lime                | -0,231*             | 0,531**  |          |          |                    |                    |                  |                  |          |                   |                   |                    |                     |       |
|                       | TN                  | 0,020               | -0,161   | -0,226*  |          |                    |                    |                  |                  |          |                   |                   |                    |                     |       |
|                       | NH <sub>4</sub> -N  | -0,164              | 0,221*   | 0,195*   | -0,036   |                    |                    |                  |                  |          |                   |                   |                    |                     |       |
|                       | NO <sub>3</sub> -N  | -0,425**            | 0,719**  | 0,371**  | -0,141   | 0,240*             |                    |                  |                  |          |                   |                   |                    |                     |       |
|                       | AP                  | -0,230*             | 0,522**  | 0,259**  | 0,172    | 0,058              | 0,257**            |                  |                  |          |                   |                   |                    |                     |       |
|                       | Ca                  | 0,072               | 0,235*   | 0,115    | 0,002    | 0,083              | 0,279**            | -0,120           |                  |          |                   |                   |                    |                     |       |
|                       | Mg                  | -0,354**            | 0,623**  | 0,608**  | -0,115   | 0,181              | 0,307**            | 0,518**          | -0,208**         |          |                   |                   |                    |                     |       |
|                       | Na                  | 0,064               | 0,030    | -0,036   | 0,328**  | -0,059             | -0,081             | 0,117            | 0,308**          | -0,042   |                   |                   |                    |                     |       |
|                       | K                   | 0,077               | 0,229*   | 0,277**  | 0,206*   | 0,054              | 0,111              | 0,209*           | 0,539**          | -0,010   | 0,415**           |                   |                    |                     |       |
|                       | Fe                  | 0,315**             | -0,353** | -0,350** | 0,168    | 0,118              | -0,091             | -0,066           | 0,258**          | -0,418** | 0,115             | -0,077            |                    |                     |       |
|                       | Cu                  | -0,233*             | 0,576**  | 0,434**  | -0,051   | 0,228*             | 0,444**            | 0,133            | 0,756**          | 0,306**  | 0,243*            | 0,566**           | -0,041             |                     |       |
|                       | Mn                  | 0,207*              | -0,348** | -0,428** | 0,458**  | -0,218*            | -0,164             | -0,273**         | 0,416**          | -0,749** | 0,314**           | 0,371**           | 0,296**            | 0,030               |       |
|                       | Zn                  | -0,374*             | 0,518**  | 0,004    | 0,072    | -0,110             | 0,345**            | 0,371**          | 0,105            | 0,208*   | 0,061             | 0,134             | -0,176             | 0,264**             | 0,029 |
|                       |                     | OC                  | AC       | PMN      | RHV      | R                  | CA                 | UA               | DA               |          |                   |                   |                    |                     |       |
| Biological Properties | AC                  | -0,026              |          |          |          |                    |                    |                  |                  |          |                   |                   |                    |                     |       |
|                       | PMN                 | 0,042               | 0,281**  |          |          |                    |                    |                  |                  |          |                   |                   |                    |                     |       |
|                       | RHV                 | -0,229              | 0,195    | -0,214*  |          |                    |                    |                  |                  |          |                   |                   |                    |                     |       |
|                       | R                   | 0,654**             | 0,017    | 0,085    | -0,255** |                    |                    |                  |                  |          |                   |                   |                    |                     |       |
|                       | CA                  | -0,098              | 0,007    | -0,055   | 0,471**  | -0,343**           |                    |                  |                  |          |                   |                   |                    |                     |       |
|                       | UA                  | 0,363**             | 0,401**  | -0,020   | 0,166    | 0,526**            | -0,190             |                  |                  |          |                   |                   |                    |                     |       |
|                       | DA                  | 0,068               | -0,821** | -0,338** | -0,180   | -0,040             | 0,094              | -0,554**         |                  |          |                   |                   |                    |                     |       |
|                       | MSN                 | 0,298**             | 0,337**  | 0,118    | 0,025    | 0,482**            | -0,127             | 0,694**          | -0,490**         |          |                   |                   |                    |                     |       |

\*  $P < 0,05$ .

\*\*  $P < 0,01$ .

**Figure 1.** Loading plots for soil physical properties on the first two principle components.

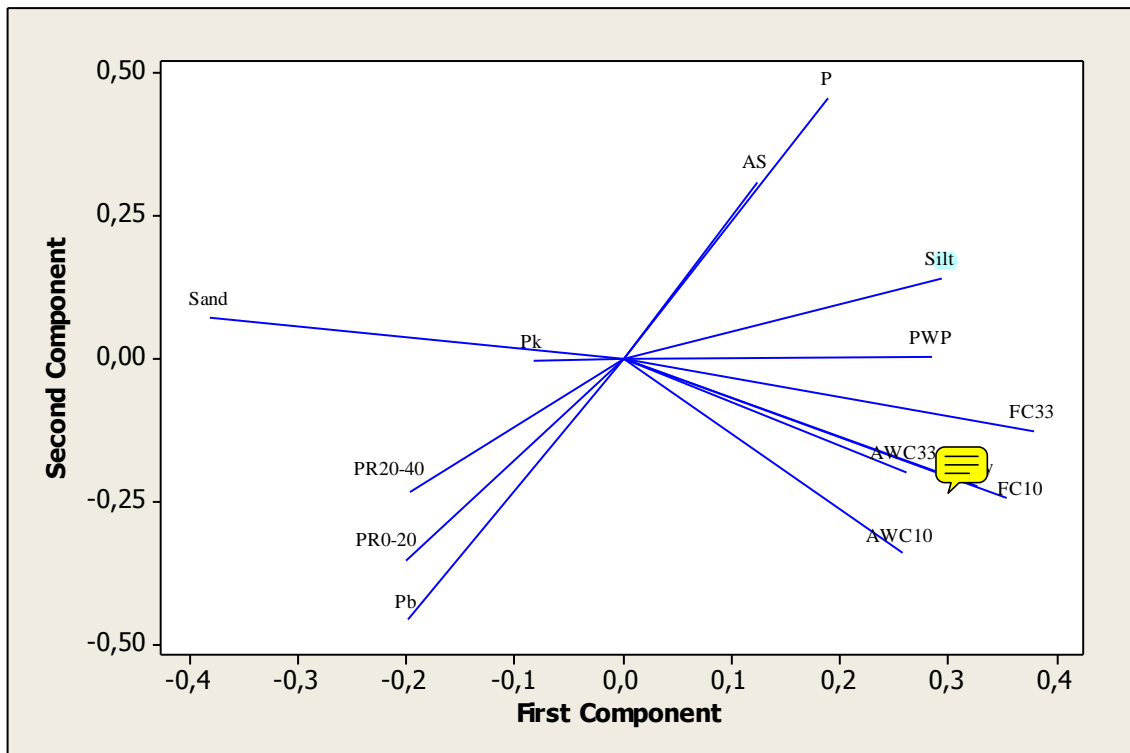

Pb, bulk density; Pk, particle density; P, porosity; FC10, field capacity (10 kPa); FC33, field capacity (33 kPa); PWP10, permanent wilting percentage; AW10, available water (10-1500 kPa); AW33, available water (33-1500 kPa); AS, Aggregate stability; PR0-20, penetration resistance (0-20 cm); PR20-40, penetration resistance (20-40 cm).

**Figure 2.** Loading plots for soil chemical properties on the first two principle components.

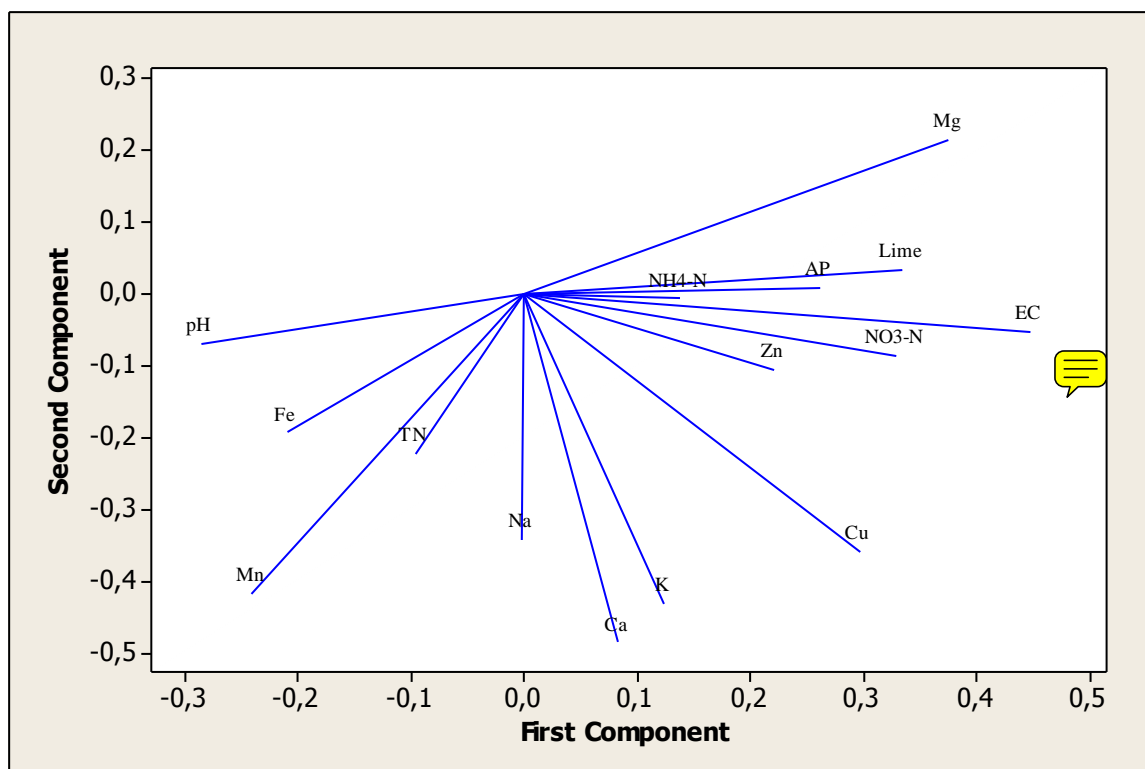

TN, total nitrogen; NH<sub>4</sub>-N, Ammonium nitrogen; NO<sub>3</sub>-N, nitrate nitrogen; AP; Available phosphorus.



**Figure 3.** Loading plots for soil biological properties on the first two principle components

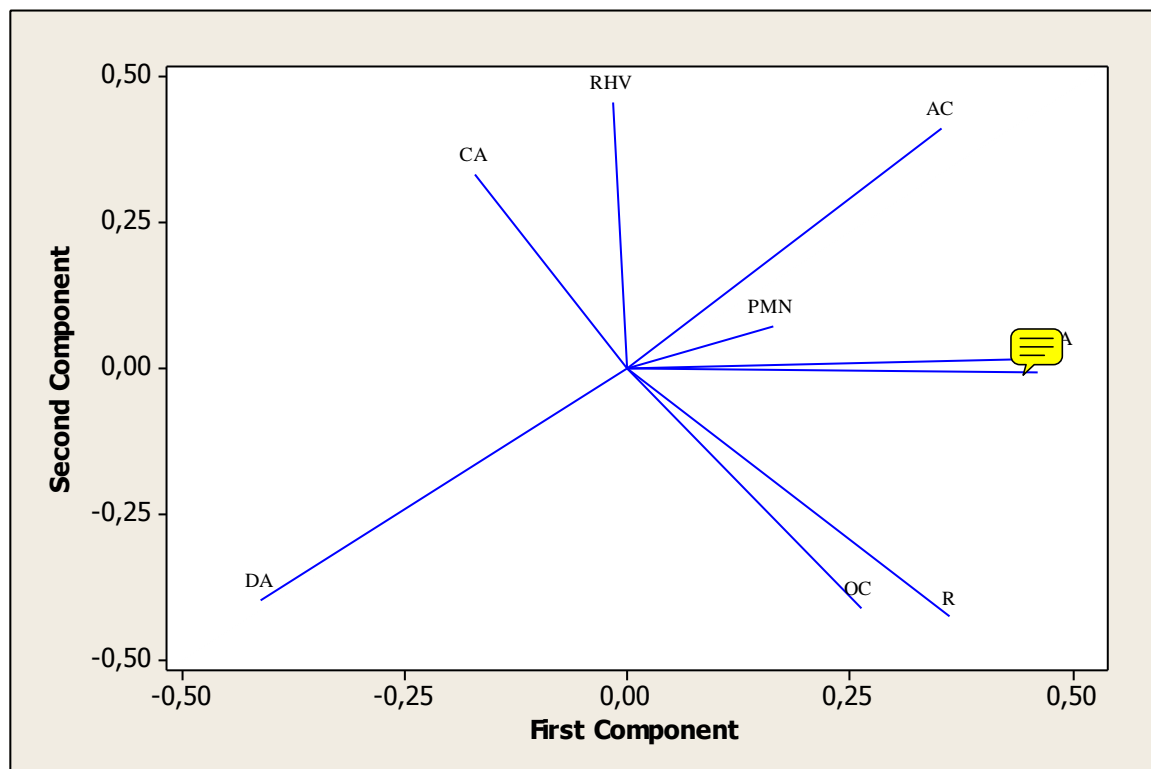

OC, organic carbon; AC, active carbon; PMN, Potential mineralizable nitrogen; RHV, root health value; R, respiration; UA urease enzyme activity; CA, catalyzing enzyme activity; DA, dehydrogenase enzyme activity; MSN, mycorrhizal fungi number.
